# Supplementary material
Source: publisher figshare collection journal article supplement (https://springernature.figshare.com/ndownloader/files/13564307)
Supplement: Supplementary file 1 [file 13564307]

mnemonic	year	X1_1_6_6_1	X1_1_7_6_1	X1_1_7_4_1	X1_1_9_3_1	X1_1_6_5_1	X1_1_7_2_1	X1_1_7_3_1	X2_2_1_1_1	X1_1_8_4_1	X1_1_4_6_1	X1_1_5_2_1	X1_2_1_1_1	X1_1_7_1_1	X1_2_2_2_1	X1_1_8_3_1	X1_1_8_5_1	X1_1_4_5_1	X1_1_9_1_1	X1_2_2_1_1	X1_1_1_2_2	X1_1_1_5_1	X1_1_4_2_1	X1_1_1_2_1	X1_1_7_7_1	X1_1_3_4_1	X1_1_2_5_1	X1_1_3_2_1	X1_1_2_1_1	X1_1_9_2_1	X1_1_2_6_1	X1_1_8_6_1	X1_1_6_3_1	X1_2_1_2_1	X1_1_2_4_1	X1_1_7_8_1	X1_1_6_2_1	X2_1_2_1_1	X1_1_2_5_2	X1_1_4_7_1	X1_1_4_3_1	X1_1_2_2_1	X1_1_8_1_1	X1_1_3_1_1	X2_1_1_1_1	X1_1_1_4_2	X1_1_6_1_1	X1_1_6_8_1	X1_2_2_3_1
E06000001	2013	0.453378264	0.582933026	0.61315964	0.333181676	0.172773841	0.183378002	0.61434411	1.627845968	0.312463057	0.386926501	0.229375116	0.326709242	0.371332124	0.879248794	0.772113678	0.259056724	0.872220418	0.016253242	0.115257384	0.94686723	1.001900462	0.750654728	1.202325629	0.371224329	0.522226523	0.392683254	0.111632683	0.825949538	0.074007175	2.273908553	0.067811226	0.250001413	0.202870132	1.005338016	0.714010474	0.20012656	1.492900908	0.449819357	0.304049837	0.100710665	0.297787578	0.131331487	0.323651457	0.670484277	0.364074666	0.211416413	0.299093747	0.507224325
E06000002	2013	0.411897711	0.543091209	0.575835794	0.311863215	0.162668796	0.171554214	0.586719547	1.571236037	0.290059096	0.355274666	0.211431843	0.289673964	0.353876243	0.831824451	0.71361397	0.235833982	0.783330113	0.014797316	0.11238867	0.885051903	0.95604977	0.688170622	1.120244414	0.342362359	0.482497029	0.351941642	0.0992684	0.74773736	0.081813149	2.043582449	0.065455722	0.235503701	0.188848195	0.942013371	0.661268688	0.193996294	1.266954034	0.399601498	0.291811005	0.11116637	0.273645478	0.125917359	0.330609433	0.598607776	0.328621366	0.202703679	0.286182464	0.476192292
E06000003	2013	0.473778556	0.599530972	0.635700041	0.344575714	0.181527834	0.195411452	0.635632332	1.613737649	0.31643825	0.396118056	0.237729051	0.342420059	0.384838706	0.866102214	0.790727368	0.264073224	0.901965218	0.017654607	0.117818613	0.972918156	1.019695733	0.780744352	1.233268649	0.383595173	0.544065643	0.404833239	0.116205183	0.865767098	0.072163757	2.353742065	0.068678067	0.257085606	0.213361743	1.037406595	0.719002725	0.205995778	1.598939763	0.477445182	0.312260219	0.094626764	0.306093179	0.134145662	0.341771237	0.698298188	0.364723225	0.220000435	0.310466466	0.518917478
E06000004	2013	0.465791963	0.601735072	0.62431483	0.33775707	0.181482222	0.185572474	0.631949624	1.509845022	0.306877924	0.385341061	0.22267972	0.32419705	0.38870864	0.856348993	0.775026252	0.257347047	0.883968759	0.017527006	0.119545386	0.941165141	1.008833372	0.741561604	1.194162498	0.357017112	0.521321324	0.393690603	0.117140544	0.83221692	0.073576157	2.235968322	0.071495841	0.258244046	0.19933777	1.030139924	0.701490401	0.200271894	1.567841001	0.447886878	0.304744665	0.109383363	0.285410556	0.125764458	0.333496608	0.652747666	0.363817808	0.216069943	0.307881756	0.522363298
E06000005	2013	0.465856764	0.596363986	0.629679264	0.33763927	0.182129957	0.18685468	0.632158887	1.598035109	0.310236732	0.38900077	0.226485506	0.327251803	0.38625392	0.861001903	0.78115457	0.258281978	0.882614246	0.01697668	0.121663295	0.947497281	1.004591309	0.752079346	1.203645358	0.365312038	0.527699552	0.392661449	0.115403591	0.840205741	0.074254131	2.274768786	0.070449027	0.257381584	0.203370741	1.025770682	0.704900946	0.203788081	1.54840919	0.453167343	0.308498143	0.105888999	0.291981026	0.128192904	0.343209256	0.657718581	0.360649413	0.216989202	0.30805867	0.522047771
E06000006	2013	0.458377288	0.594914571	0.618761737	0.336667714	0.177352433	0.183134073	0.620878581	1.615047216	0.311686256	0.387491978	0.225189016	0.329494864	0.379841924	0.868447326	0.780493524	0.259963024	0.88599089	0.016983183	0.116474259	0.940685604	1.003703018	0.748558864	1.200517361	0.362760825	0.516369499	0.398946026	0.114561139	0.830171657	0.071538822	2.269998566	0.070545875	0.254339026	0.198986521	1.024165849	0.70931164	0.198838615	1.530716348	0.458369212	0.30452204	0.10636527	0.289129049	0.128071261	0.320837684	0.646284522	0.369464511	0.211252686	0.299844959	0.520075877
E06000007	2013	0.478198064	0.615070818	0.639665041	0.342065271	0.187421675	0.187956211	0.64838284	1.520134247	0.312867131	0.391049273	0.225148757	0.331456124	0.399669627	0.875908255	0.793939461	0.261908554	0.901650778	0.017955215	0.124997614	0.9586317	1.024299406	0.751866356	1.21332179	0.360367427	0.531592933	0.400638402	0.121338203	0.848692738	0.075995236	2.265010598	0.073295179	0.264786246	0.20264543	1.058407324	0.714544348	0.203953798	1.612605667	0.455549778	0.310721116	0.11189086	0.290099411	0.127089872	0.344212627	0.656366313	0.372146704	0.221912486	0.314960422	0.537710559
E06000008	2013	0.392600477	0.525676467	0.561219276	0.294187352	0.171078366	0.164398494	0.595634996	1.433211835	0.268472767	0.336560306	0.194430246	0.263395331	0.364514934	0.802822572	0.672569371	0.222948087	0.722512179	0.013560804	0.115485659	0.844308128	0.946735089	0.633944493	1.071043131	0.316883061	0.455087057	0.314283552	0.097168955	0.659452593	0.097643063	1.794911678	0.059273133	0.232936083	0.17783282	0.924103062	0.616893766	0.196300654	1.122826925	0.342068843	0.296000548	0.142244379	0.244334744	0.123063898	0.347981207	0.538089106	0.302024142	0.208978183	0.289888363	0.459666994
E06000009	2013	0.448479164	0.576209801	0.614563972	0.333657566	0.172540292	0.18736928	0.612989412	1.730378903	0.307527121	0.381540385	0.230542574	0.325949271	0.371168599	0.860224099	0.762839386	0.251960237	0.85016937	0.016527869	0.117874963	0.950288406	0.991379835	0.753265474	1.199259584	0.374238937	0.526352915	0.381916577	0.104798332	0.827683613	0.075124419	2.285729771	0.067771636	0.247834785	0.207685138	0.998664019	0.702288157	0.20256878	1.444292465	0.453186312	0.306164339	0.095258376	0.300041028	0.133865106	0.345161155	0.661232511	0.351276164	0.211329032	0.301290807	0.498815808
E06000010	2013	0.406184505	0.547440709	0.56802126	0.311860421	0.158580045	0.165762394	0.568512602	1.640279778	0.287100562	0.353466332	0.206849296	0.292560304	0.348372122	0.835227721	0.714734394	0.233335225	0.789584416	0.014780603	0.110252732	0.870834371	0.934735766	0.680039871	1.10783845	0.333424026	0.472386658	0.353725843	0.098994144	0.748645687	0.073358288	2.073936006	0.065506776	0.229734504	0.182427066	0.928584879	0.661809246	0.186991437	1.307536337	0.406495983	0.283386994	0.10261934	0.266857739	0.121080746	0.301299307	0.615050504	0.339461531	0.19220302	0.277430419	0.475301556
E06000011	2013	0.506996257	0.630147961	0.666173911	0.354815477	0.195388455	0.207525947	0.674963098	1.524793093	0.317133545	0.408115922	0.243736437	0.361122114	0.409014235	0.85847837	0.817156577	0.272131343	0.944575114	0.019266643	0.124025415	0.998489626	1.039487236	0.806574733	1.260901251	0.392277588	0.572168865	0.41853933	0.127532706	0.905391628	0.074893277	2.394512285	0.069981671	0.269392132	0.222662582	1.091549176	0.719681437	0.21352474	1.750508071	0.494758978	0.326094825	0.095371901	0.312900469	0.135012462	0.371021692	0.719384905	0.367483775	0.23449293	0.33099416	0.540607774
E06000012	2013	0.450435303	0.577807437	0.605864564	0.330134184	0.173297089	0.18435779	0.608255741	1.581725606	0.300690402	0.376734117	0.223590095	0.322902303	0.370659776	0.845226508	0.757068201	0.250368089	0.855693851	0.016824559	0.112576033	0.928795679	0.979826484	0.738608042	1.177927743	0.361401424	0.517636724	0.382605036	0.109889431	0.818891709	0.071311879	2.231801147	0.065918635	0.245272529	0.200715186	0.990812547	0.691126594	0.196974645	1.50647739	0.451615032	0.298434262	0.096943599	0.287329034	0.127496865	0.323398204	0.666396831	0.352673292	0.209180975	0.297438963	0.498733312
E06000013	2013	0.473460061	0.606335835	0.63118906	0.342666913	0.184581597	0.191070725	0.6408996	1.534125909	0.305148968	0.389550071	0.227831396	0.335982757	0.392871057	0.855322938	0.778655655	0.25872392	0.892352339	0.0179656	0.118403519	0.950542183	1.008744513	0.758516505	1.205059304	0.367246354	0.536568113	0.395176928	0.120486086	0.848136147	0.074082142	2.269252159	0.068385052	0.258629973	0.206649607	1.03527171	0.698179091	0.20336328	1.614529784	0.460758102	0.310413936	0.109349868	0.291825873	0.128098084	0.343847327	0.674011284	0.361154616	0.221211598	0.314140403	0.518920934
E06000014	2013	0.46116423	0.597075988	0.622707778	0.329806621	0.185311686	0.184241702	0.629535811	1.5270153	0.298894041	0.378412713	0.218336878	0.319526953	0.389251146	0.839431089	0.770816765	0.250528707	0.866440592	0.017243752	0.117692186	0.924614212	0.990916619	0.730432227	1.172799445	0.350266437	0.517043904	0.3796164	0.114114496	0.824325022	0.076727506	2.190229919	0.071449521	0.253705675	0.198609947	1.008059774	0.683304658	0.20026323	1.520896163	0.440797868	0.30650206	0.099906597	0.281618093	0.124354545	0.338720906	0.65701452	0.355786785	0.216696974	0.305860395	0.516506487
E06000015	2013	0.432472363	0.563640445	0.593444284	0.315335826	0.17864389	0.172045674	0.615843493	1.458664695	0.283434642	0.359168954	0.205747783	0.289397937	0.374041983	0.835540141	0.724129061	0.239206633	0.792653939	0.015452675	0.117184876	0.884512634	0.969973433	0.681437211	1.117444398	0.33079451	0.488693292	0.349369871	0.106127271	0.733357003	0.08691604	1.995857082	0.065458222	0.246388207	0.188184093	0.964218938	0.649432377	0.199401558	1.317215243	0.388527123	0.302190543	0.132090185	0.265029803	0.121817381	0.343598902	0.602647956	0.332133742	0.214259448	0.300481794	0.495675015
E06000016	2013	0.347191061	0.477396866	0.544936689	0.256371578	0.174531607	0.155783422	0.607968749	1.197944444	0.229244937	0.282634372	0.168137439	0.209102862	0.36549974	0.751554398	0.595301303	0.197652518	0.594560149	0.011144299	0.118622834	0.764472605	0.89311289	0.54301815	0.964891469	0.282687694	0.421789083	0.255767131	0.085603686	0.531842787	0.122719676	1.41280573	0.048092236	0.221819355	0.166323002	0.871017331	0.531926488	0.201925439	0.818114593	0.255636151	0.301505803	0.169508149	0.215003987	0.115576278	0.382206807	0.458612758	0.247665456	0.222364574	0.292135843	0.418790498
E06000017	2013	0.542440352	0.650589097	0.697487372	0.37250427	0.209513554	0.214617303	0.704023776	1.502990264	0.330207632	0.426275929	0.253554312	0.364630929	0.422256615	0.898024705	0.84808629	0.285099866	0.987893561	0.019285312	0.140430495	1.051617803	1.072789626	0.831622673	1.311600682	0.408942788	0.609999962	0.432460641	0.135487698	0.958248254	0.076412897	2.499027013	0.072038609	0.285890199	0.234830919	1.137966479	0.744135697	0.224705674	1.859830797	0.504267042	0.337050203	0.105348401	0.332053698	0.140742969	0.408811183	0.749999858	0.382810128	0.244802947	0.349432373	0.566899623
E06000018	2013	0.364969423	0.510455835	0.536828597	0.279600791	0.15278887	0.151447317	0.559379219	1.478975781	0.258729611	0.318757235	0.187179162	0.249663454	0.331094501	0.811075261	0.652224207	0.21025169	0.683953289	0.012052475	0.107388824	0.790546781	0.895283415	0.598003037	1.013983571	0.298687764	0.436572226	0.30453692	0.091194999	0.654665317	0.093581642	1.779753485	0.062188161	0.220140135	0.16644475	0.872895083	0.597184082	0.185953558	1.04790061	0.336166536	0.283681483	0.127741944	0.251555452	0.117250003	0.326760378	0.548653651	0.298745887	0.194434905	0.265471489	0.456563107
E06000019	2013	0.498052285	0.613609423	0.655650136	0.353896431	0.189848784	0.20343767	0.65591405	1.564058976	0.319500724	0.402403434	0.242152575	0.346773404	0.396136809	0.85654823	0.80380224	0.266515002	0.922934538	0.01812336	0.13283161	0.995685153	1.027118274	0.794101382	1.246710799	0.388533785	0.569891312	0.407881968	0.124196447	0.907698937	0.072661211	2.390324869	0.071305315	0.265912282	0.221906898	1.08001904	0.713636479	0.210472685	1.680804226	0.479493187	0.31731592	0.095908458	0.314434247	0.136265337	0.38140327	0.710831717	0.360342567	0.228075337	0.328634288	0.531199289
E06000020	2013	0.445564359	0.582843907	0.605449508	0.329145548	0.175015339	0.178677421	0.616544179	1.567943094	0.300329442	0.375169872	0.216866849	0.314290705	0.37845715	0.861267729	0.760147244	0.249182626	0.846658369	0.016423084	0.117424795	0.924564519	0.993900113	0.720146934	1.169327835	0.349708583	0.503380975	0.37886849	0.112201571	0.794610681	0.077158623	2.149066402	0.068244524	0.249840249	0.194230614	1.002750135	0.692185181	0.197676956	1.446502885	0.430869288	0.30120413	0.118071698	0.277397759	0.125616796	0.327482301	0.62165609	0.355270713	0.211567438	0.300655848	0.509112433
E06000021	2013	0.420487078	0.552194397	0.586395425	0.311652692	0.171107841	0.173048895	0.600563518	1.5813041	0.285596503	0.356581361	0.20998091	0.295889846	0.36321828	0.830998573	0.719223717	0.2386293	0.790147086	0.014820841	0.113838603	0.879803217	0.958141312	0.690081354	1.120212268	0.341054157	0.487266123	0.351796311	0.104005232	0.749602988	0.083087272	2.040638709	0.063649927	0.240264344	0.190334421	0.953588409	0.654263465	0.196860098	1.313824622	0.40154727	0.297644023	0.116960173	0.272153596	0.124376382	0.34078578	0.606316587	0.330021389	0.208815948	0.291181351	0.48253997
E06000022	2013	0.496317191	0.631879653	0.660125957	0.34804986	0.197627678	0.197145347	0.667814772	1.511638025	0.317692198	0.401019234	0.232112311	0.33969472	0.411693104	0.872610586	0.817476418	0.266706986	0.918682113	0.018282805	0.130282325	0.979133627	1.036966714	0.771613259	1.235521766	0.37025616	0.554358275	0.401584982	0.125277851	0.877197831	0.079648813	2.318940371	0.073152871	0.270847603	0.214285984	1.074048842	0.712360433	0.210890528	1.665632544	0.461471309	0.32219905	0.101733533	0.301484423	0.131561306	0.371637794	0.704631156	0.368911886	0.231825955	0.332051391	0.542961983
E06000023	2013	0.430143803	0.581802122	0.601079505	0.316622778	0.179614139	0.167116168	0.616038344	1.547724562	0.284935863	0.357054385	0.20283943	0.286076409	0.377725833	0.857040883	0.734116485	0.237358847	0.799414488	0.015282582	0.121461424	0.875340549	0.969640622	0.673014259	1.115419524	0.322282459	0.48370499	0.350631666	0.106935046	0.758723396	0.087098123	2.027781232	0.073519284	0.246930574	0.184800264	0.96373524	0.657057777	0.19705851	1.336214724	0.387928851	0.302166565	0.128111128	0.262642926	0.120843644	0.339454006	0.62228926	0.346357239	0.211393664	0.297965695	0.503586557
E06000024	2013	0.522242853	0.644974028	0.680480801	0.363630082	0.203162904	0.209576961	0.691971849	1.53747052	0.326779337	0.420208691	0.24656649	0.366874793	0.419693856	0.884595795	0.835506872	0.278907141	0.96525324	0.019935875	0.125347918	1.018452565	1.07458884	0.817870637	1.28827761	0.396066008	0.580631547	0.424608168	0.129681879	0.915707732	0.077234009	2.442874051	0.073746534	0.279421719	0.223661659	1.106244565	0.739138137	0.218698676	1.768946053	0.500361808	0.332161825	0.109193934	0.316589063	0.136935866	0.375616438	0.722836848	0.382480682	0.240125386	0.336825568	0.560047003
E06000025	2013	0.500978225	0.63854642	0.664736084	0.359777162	0.197206496	0.196921651	0.675713198	1.551074548	0.323240698	0.406587628	0.233669939	0.345794441	0.416181413	0.908156877	0.830799045	0.272887914	0.93642412	0.019010714	0.126812597	0.998882399	1.067378668	0.78575019	1.260798164	0.374990776	0.555893835	0.416505348	0.1266978	0.882975236	0.07885883	2.344992543	0.076345342	0.275376568	0.213043927	1.096564141	0.742623426	0.212847983	1.683046997	0.476186521	0.32362095	0.117520343	0.301521388	0.130789391	0.356226199	0.687014327	0.386084969	0.232772591	0.3270672	0.559372479
E06000026	2013	0.460613897	0.599694375	0.629763078	0.338983071	0.181166222	0.18559561	0.629406739	1.662564116	0.310207032	0.386020932	0.225540716	0.324218957	0.386987571	0.884186984	0.787947269	0.257698023	0.875406712	0.016528233	0.121310237	0.947688574	1.014134102	0.747096106	1.204585905	0.364518618	0.525473	0.388234795	0.113959536	0.835385937	0.078666745	2.253654546	0.071641899	0.255902732	0.203016027	1.0274176	0.710228884	0.204416346	1.496738669	0.446925463	0.310964778	0.107953134	0.292268043	0.130831472	0.343286923	0.671608463	0.366694086	0.216435484	0.306919102	0.521100627
E06000027	2013	0.516279442	0.629133429	0.677286858	0.367565697	0.195545315	0.21419149	0.677859026	1.669238087	0.328859812	0.417876606	0.253481002	0.363351573	0.409667425	0.873284478	0.825732007	0.276621936	0.948951757	0.019305058	0.128989562	1.034119568	1.059064665	0.830547177	1.297356998	0.411614487	0.594286364	0.418189059	0.123617572	0.931752514	0.076564593	2.489051447	0.071072404	0.272008936	0.234557006	1.097909219	0.731394105	0.22093954	1.70219495	0.504046538	0.333207253	0.094629458	0.326616755	0.14478427	0.395379439	0.742127185	0.366099776	0.237175877	0.340663606	0.540043413
E06000028	2013	0.464137808	0.607640904	0.633962541	0.33687663	0.187818913	0.184993902	0.638998157	1.616286543	0.299944022	0.379815917	0.218337328	0.317900834	0.39893927	0.856307162	0.775878687	0.250428941	0.86556496	0.017303982	0.122748844	0.929061621	0.998420264	0.732046425	1.181815446	0.351369939	0.522918516	0.374860089	0.115319922	0.831086658	0.080262549	2.221131337	0.073019214	0.257072028	0.202232275	1.009737854	0.684230493	0.204708905	1.515880888	0.435964818	0.311627552	0.107015817	0.281835997	0.12745937	0.353435964	0.684298855	0.360680507	0.220119201	0.313654737	0.51946302
E06000029	2013	0.513060815	0.637287536	0.676468223	0.365041579	0.20208282	0.205017467	0.685787466	1.566188419	0.321540764	0.411105957	0.239699293	0.352367245	0.420503035	0.88423246	0.829304335	0.273679866	0.940647573	0.019246837	0.128128605	1.005954425	1.058491572	0.802070178	1.264499919	0.385342321	0.575979629	0.411440844	0.127096493	0.901251976	0.078678156	2.382997597	0.074686306	0.276268675	0.221968946	1.09881789	0.726997329	0.218553946	1.702362324	0.483586297	0.330542912	0.113533789	0.308349165	0.133854111	0.380050901	0.706821541	0.373270204	0.237471263	0.334783042	0.552830111
E06000030	2013	0.46592393	0.611628409	0.634992445	0.339571797	0.188266119	0.182796689	0.648366951	1.589967107	0.307269841	0.385242126	0.220476752	0.318118856	0.399814284	0.889572232	0.784066239	0.258619195	0.87313971	0.016710791	0.125270777	0.948913016	1.030804802	0.736708497	1.203061522	0.353157675	0.521707384	0.386705177	0.117485286	0.81493969	0.083655204	2.194914323	0.0735184	0.263800214	0.199916259	1.03984191	0.708989651	0.206311319	1.499831181	0.432463875	0.314093808	0.126533154	0.283770657	0.127530653	0.347710709	0.64983185	0.368201314	0.223137805	0.31620119	0.533866686
E06000031	2013	0.43048015	0.564148194	0.589050552	0.319982338	0.175812596	0.170412615	0.608286533	1.482248745	0.288063889	0.360251084	0.202212763	0.290505065	0.374565227	0.839287112	0.731823607	0.240531507	0.799573191	0.015576634	0.11507202	0.885720646	0.971982576	0.68207152	1.11985648	0.328919538	0.481989535	0.35577976	0.106551006	0.743291218	0.081470415	2.005451338	0.068742379	0.245530403	0.183449314	0.969264128	0.663088216	0.197100773	1.322795406	0.395998766	0.296835726	0.136371334	0.260541796	0.119444882	0.32886243	0.584066328	0.339465762	0.210529495	0.293500158	0.497216826
E06000032	2013	0.380021712	0.503167202	0.551458997	0.276663276	0.174135056	0.153954077	0.606021781	1.20955806	0.240118542	0.307690198	0.178390964	0.225925404	0.353824792	0.782759259	0.617490037	0.210932962	0.646149821	0.011993682	0.120954287	0.79142182	0.92563851	0.571890238	0.993541886	0.284882462	0.437258921	0.283821013	0.094484406	0.592374689	0.106146706	1.557300442	0.056543813	0.232628265	0.166574726	0.887653991	0.56121076	0.199028588	0.987666368	0.288602297	0.295641906	0.184274813	0.230545166	0.113729795	0.364816434	0.513748345	0.270766597	0.2202967	0.29031783	0.448712801
E06000033	2013	0.475753698	0.605842766	0.634630885	0.338939839	0.187612498	0.187097429	0.648752306	1.507232085	0.305059242	0.388085774	0.224531123	0.322267303	0.394297076	0.858944918	0.769215479	0.255440837	0.871766586	0.017292386	0.125759999	0.942631593	1.014538049	0.739258621	1.194101921	0.357986577	0.532458826	0.382933864	0.117280613	0.831329281	0.079821697	2.217392641	0.072546147	0.260532933	0.203111043	1.029312539	0.689032548	0.206803735	1.531878596	0.435814459	0.314849251	0.121046704	0.290124204	0.128964111	0.359354282	0.655068693	0.35604178	0.222197002	0.31560074	0.528404848
E06000034	2013	0.451220872	0.593815074	0.607244069	0.327549731	0.176630593	0.171076986	0.624514127	1.446290253	0.292219459	0.375823132	0.209758867	0.299220712	0.376137952	0.873681274	0.733073435	0.244769076	0.826676584	0.01624371	0.123303916	0.899804479	1.004153695	0.686216846	1.142906429	0.329833296	0.496761789	0.370051421	0.113707589	0.769496236	0.082052359	2.057866152	0.072067155	0.253622925	0.185480975	1.006448061	0.669680739	0.200018034	1.400214813	0.400940886	0.305067567	0.149107752	0.27117561	0.122609162	0.343505714	0.599455812	0.346860685	0.212758459	0.301560061	0.524850221
E06000035	2013	0.460552574	0.602631266	0.621643652	0.336020014	0.182154503	0.180414421	0.634774883	1.561803917	0.305813503	0.387471767	0.220889287	0.31829015	0.387101401	0.892130429	0.771673037	0.256538853	0.867990674	0.016597237	0.124313894	0.936324454	1.020197642	0.729171892	1.193497733	0.352426369	0.517359069	0.387112053	0.116669411	0.810610012	0.080346992	2.199142071	0.070651475	0.259040929	0.196048453	1.030132171	0.700503344	0.202720425	1.490173978	0.430470902	0.310523927	0.127179421	0.283615151	0.127918382	0.343031772	0.645500281	0.364674488	0.217154733	0.30975707	0.528661162
E06000036	2013	0.498582884	0.653519384	0.661269873	0.35296803	0.203614259	0.186497573	0.685244039	1.410841037	0.308711805	0.398017571	0.215650425	0.33016889	0.433843001	0.895804381	0.810010094	0.263590993	0.92016831	0.019620877	0.130747767	0.960419982	1.054639533	0.740046569	1.216394107	0.344633919	0.53603861	0.399654658	0.130234386	0.844380649	0.08421934	2.216292699	0.077709239	0.277336374	0.197465215	1.088234325	0.710560267	0.20803676	1.674147726	0.440487603	0.320935424	0.140995517	0.274734697	0.122554985	0.355198198	0.652705295	0.384721681	0.232133918	0.335936861	0.562150022
E06000037	2013	0.511207292	0.655918114	0.668763498	0.359087967	0.201923899	0.197494763	0.686090664	1.449455022	0.320803358	0.407622705	0.229354608	0.349654811	0.429791446	0.887072568	0.826563271	0.270868432	0.946474531	0.020141122	0.131396617	0.988054722	1.056317001	0.776205027	1.251711808	0.364404461	0.554185117	0.413569042	0.132343174	0.883675342	0.078611286	2.320360771	0.076897591	0.277264369	0.208299683	1.112745114	0.72466246	0.209730352	1.75009522	0.467400764	0.323000345	0.121827746	0.291926899	0.127406735	0.362164832	0.681732825	0.383334836	0.231636013	0.336148793	0.56442943
E06000038	2013	0.431718492	0.582317797	0.595554884	0.308765071	0.18956378	0.162729206	0.63410096	1.359743761	0.266186701	0.349759001	0.18994768	0.27126741	0.390583743	0.837397364	0.711146903	0.230216821	0.767219625	0.015551474	0.123822818	0.852103014	0.968132261	0.641719692	1.085061336	0.302993229	0.469611331	0.330529861	0.10922411	0.701903822	0.097880216	1.863522885	0.068797426	0.25135537	0.177021324	0.962108147	0.622995547	0.200950587	1.273166221	0.351196636	0.308613308	0.164325208	0.244678346	0.115375508	0.351567992	0.593490435	0.332929482	0.222592451	0.309096815	0.499720102
E06000039	2013	0.375909444	0.494788417	0.557310192	0.259545124	0.186842818	0.151601699	0.629778568	1.13465697	0.229242972	0.296959023	0.168159451	0.208503756	0.36430721	0.768084404	0.597871825	0.207444842	0.606513835	0.011043497	0.130113716	0.787010805	0.928922817	0.544115189	0.967071516	0.271204552	0.426414223	0.268728261	0.090986671	0.531329976	0.118461837	1.401563086	0.053595007	0.237597147	0.163099567	0.880021479	0.535192232	0.206302901	0.878268829	0.250304033	0.304023482	0.211647231	0.219712674	0.113926876	0.385753532	0.505758693	0.259902781	0.236293169	0.298482725	0.437305348
E06000040	2013	0.520800638	0.646269723	0.671912642	0.347395305	0.225755703	0.19812704	0.711198831	1.291571031	0.304421743	0.395115505	0.219286738	0.338774736	0.447237499	0.848567192	0.808410744	0.264140233	0.909106145	0.020107067	0.133542198	0.966863795	1.040247287	0.756507531	1.216030152	0.352967291	0.542042549	0.390292026	0.135042469	0.839119381	0.091906204	2.177319824	0.070736644	0.28298296	0.205790828	1.094461845	0.681868995	0.214420611	1.67909779	0.432346189	0.33156385	0.145420422	0.275471658	0.126077561	0.386381459	0.667430487	0.369046166	0.244332287	0.353926311	0.559551007
E06000041	2013	0.518207112	0.652401254	0.673322913	0.348206306	0.21752551	0.197206468	0.711205385	1.28417721	0.311181042	0.40049773	0.221343345	0.343122861	0.443367232	0.86466307	0.812712089	0.267566528	0.92764868	0.019945205	0.133810547	0.970906718	1.054342383	0.756939699	1.224652579	0.353413613	0.542698733	0.402604745	0.138213622	0.853668314	0.089437917	2.199014962	0.076048653	0.283876334	0.2051496	1.112240442	0.70253502	0.212760306	1.729161853	0.441070502	0.328138771	0.138024352	0.280802899	0.124252823	0.382696547	0.672629777	0.374978318	0.244618319	0.349017109	0.5643697
E06000042	2013	0.446942571	0.595482957	0.614774791	0.323107396	0.185573573	0.171375238	0.64418419	1.444799503	0.287726733	0.368157384	0.205852601	0.291854543	0.393777834	0.867127566	0.73442266	0.243805923	0.815100682	0.016018584	0.126312368	0.89383901	1.004083926	0.680050153	1.136220084	0.326187653	0.491024634	0.360078668	0.115305655	0.750810869	0.091449427	1.991253089	0.072558977	0.257074705	0.18351168	1.013037077	0.664041225	0.203273517	1.369238847	0.384795225	0.312260424	0.156409639	0.262442154	0.121344507	0.353776777	0.593214197	0.346989163	0.221261696	0.307967848	0.524108701
E06000043	2013	0.450593467	0.614156886	0.631145936	0.320562417	0.191301692	0.17392588	0.639554293	1.602208836	0.29421275	0.367795252	0.207584242	0.301820492	0.406005818	0.866457699	0.770799566	0.24446909	0.838766069	0.01628441	0.130086575	0.904490897	0.989190402	0.696705121	1.159639567	0.331722428	0.50154106	0.362055685	0.115356971	0.791478846	0.088647409	2.129081985	0.074154502	0.259016432	0.190963444	1.006248241	0.678196818	0.201901209	1.442328447	0.402600566	0.309595483	0.113335743	0.265986743	0.124227745	0.357827328	0.664214683	0.362731781	0.218683683	0.312655068	0.522078345
E06000044	2013	0.427930885	0.575271146	0.592896009	0.32055392	0.171157768	0.167921367	0.595253766	1.584156698	0.292825758	0.361906412	0.205064771	0.295701637	0.369230964	0.857079642	0.739585278	0.240624485	0.815053219	0.015154536	0.116543126	0.885532256	0.971278466	0.685922542	1.12963886	0.327940141	0.484634355	0.361089416	0.10709982	0.775726395	0.076903963	2.089287997	0.071300033	0.244531014	0.184443371	0.969261139	0.672513564	0.192703759	1.371818151	0.408264411	0.292515312	0.117047844	0.26607644	0.120075219	0.318882722	0.616808664	0.34995515	0.202691999	0.287437022	0.503963523
E06000045	2013	0.415178922	0.565383231	0.585961613	0.312297747	0.174547581	0.165526277	0.596583924	1.563974704	0.281823809	0.350907079	0.199146674	0.284707423	0.369336523	0.843826111	0.726563147	0.235102218	0.78274136	0.014447798	0.115789576	0.862861828	0.952974525	0.665494816	1.102695577	0.321373413	0.47132705	0.343615305	0.10427077	0.735640303	0.085990895	1.988197512	0.069070836	0.23945996	0.181975435	0.947189232	0.650903433	0.194351964	1.286749575	0.383806582	0.296094055	0.124567055	0.257666342	0.119809944	0.331212264	0.609991612	0.338242457	0.20641024	0.288869919	0.487661224
E06000046	2013	0.52316274	0.633216388	0.686338255	0.368741096	0.200737897	0.217027804	0.690560419	1.650775122	0.33112596	0.423766185	0.257480366	0.369544156	0.413526797	0.888781155	0.835825331	0.280004126	0.961883052	0.019445036	0.129530964	1.042992097	1.072799623	0.838773478	1.306837164	0.417423148	0.59933055	0.425211363	0.12753206	0.930682717	0.078672812	2.502551659	0.070295143	0.275770507	0.23607571	1.110288172	0.738713884	0.22459942	1.730853637	0.508679161	0.339424549	0.096700076	0.329878203	0.145928702	0.398334186	0.754219189	0.371961714	0.243277952	0.343105726	0.547104744
E06000047	2013	0.475324416	0.609562767	0.641614107	0.34444122	0.18458671	0.193433954	0.644763135	1.662264009	0.315351996	0.398464267	0.236873341	0.343936296	0.391451577	0.88536988	0.800554259	0.265301454	0.907861762	0.017369829	0.119615069	0.974958101	1.031079692	0.780539112	1.238768724	0.382617075	0.545238925	0.405423907	0.118252053	0.867427929	0.075892725	2.355026526	0.070200685	0.261553923	0.212193653	1.04829949	0.724835196	0.207590329	1.593230797	0.47487134	0.316569941	0.101664824	0.306812074	0.134143868	0.346971117	0.689650517	0.372651241	0.222002311	0.314165964	0.528210789
E06000049	2013	0.499105981	0.626722536	0.660078604	0.348413574	0.19788655	0.20009434	0.675504346	1.512375749	0.314482912	0.401474935	0.23614777	0.344203816	0.412800116	0.867556155	0.80495782	0.266250645	0.920337031	0.018662567	0.129568881	0.987667054	1.04325191	0.782733486	1.242313258	0.379262214	0.559072642	0.404879482	0.126169602	0.879846687	0.081232169	2.323319654	0.071946595	0.271252502	0.215975226	1.08101077	0.714180539	0.213074138	1.677107106	0.468558424	0.324870308	0.107960117	0.302836871	0.133218535	0.377524519	0.696327942	0.367468714	0.235295603	0.333011928	0.541705356
E06000050	2013	0.495700995	0.627187968	0.654505947	0.349724308	0.19382461	0.196353444	0.664611471	1.539205612	0.316017819	0.401596552	0.233464231	0.347184071	0.408442456	0.873374185	0.809727832	0.267517279	0.927336207	0.018757017	0.125755628	0.980091722	1.034445722	0.778975742	1.238747288	0.374878642	0.552927519	0.408740366	0.125182026	0.882866619	0.076282383	2.341726995	0.073384484	0.269008868	0.21204122	1.07213926	0.71729018	0.209037817	1.685809134	0.472312642	0.319651331	0.105576226	0.299998773	0.130658527	0.358605258	0.691699412	0.373752343	0.227340763	0.324890388	0.542085932
E06000051	2013	0.506532453	0.630513081	0.664856771	0.354708392	0.196102958	0.204457633	0.670610021	1.49458183	0.317645564	0.403192503	0.238565072	0.353709143	0.410983967	0.858005884	0.81487062	0.269288887	0.937894068	0.019137331	0.12820394	0.989948093	1.030440993	0.792726437	1.24589332	0.382004315	0.568862124	0.413688603	0.128337621	0.906294249	0.073493435	2.374767118	0.072075423	0.270403597	0.220358678	1.088524289	0.713522855	0.211291643	1.752472994	0.484610488	0.320585313	0.096929229	0.306774494	0.131889437	0.371455549	0.709112617	0.365592445	0.233204542	0.331012397	0.540016353
E06000052	2013	0.520492502	0.640248246	0.686054056	0.36823748	0.197295662	0.214459768	0.683578926	1.641315025	0.333170856	0.421590216	0.254242157	0.365244758	0.415344342	0.882989781	0.837846097	0.279204242	0.965119401	0.018994508	0.134203281	1.037103086	1.069606216	0.831842417	1.302899506	0.409798036	0.59455723	0.425154104	0.128325074	0.93881765	0.076286897	2.492025414	0.073086192	0.274464108	0.232958681	1.11969297	0.742568857	0.220522038	1.740933494	0.506656137	0.333558257	0.096244921	0.326724677	0.143902316	0.39259173	0.741878863	0.372914301	0.238230666	0.342491787	0.551375427
E06000053	2013	0.513546792	0.650507354	0.690158171	0.347415948	0.220263858	0.216785613	0.698650439	1.594778638	0.326174181	0.403297389	0.250013382	0.375582882	0.430419259	0.846139245	0.830790318	0.274741338	0.951455592	0.015575086	0.153564143	1.037920538	1.076289471	0.857080972	1.330065016	0.416026832	0.609031659	0.398416076	0.138464569	0.884113864	0.084947708	2.374215163	0.065107911	0.288628134	0.2200904	1.105691482	0.734970824	0.224135981	1.66401522	0.475341666	0.347854461	0.14611356	0.295720275	0.158662318	0.400979639	0.714893043	0.356923612	0.253872327	0.32784118	0.563531858
E06000054	2013	0.51203998	0.641879989	0.673529769	0.36200443	0.197301117	0.204042009	0.683712748	1.536020549	0.327836589	0.412869014	0.240670207	0.353960966	0.419001736	0.891063738	0.832462884	0.274446101	0.946490329	0.018955215	0.133768136	1.011410099	1.064698168	0.799858853	1.273560727	0.385802073	0.570187278	0.418198609	0.128956247	0.90519795	0.078370098	2.379192184	0.075525143	0.276615001	0.219641794	1.116523185	0.735900183	0.21570907	1.71553712	0.478308104	0.326728152	0.112739984	0.310722274	0.135196692	0.376996831	0.70113032	0.376254696	0.235425857	0.335749737	0.556737826
E06000055	2013	0.464865673	0.60151694	0.630373455	0.329372143	0.19265987	0.183271601	0.655672493	1.384269819	0.28876906	0.37184537	0.213668086	0.305283948	0.400408868	0.840409047	0.745740236	0.248746725	0.836124193	0.017145252	0.128011096	0.915022678	1.000176004	0.709017148	1.152610663	0.339298101	0.51667637	0.367004381	0.119283219	0.786357592	0.086534751	2.060537126	0.069135268	0.260062389	0.196207964	1.015326555	0.661177679	0.20672003	1.481495359	0.408362267	0.312506359	0.132406044	0.271670125	0.122494428	0.369681241	0.637773605	0.338379782	0.228868147	0.319287214	0.521441516
E06000056	2013	0.496361084	0.638252593	0.657807473	0.349229603	0.196529784	0.192310835	0.675365789	1.424571326	0.30934978	0.397623816	0.225329297	0.338771676	0.417438571	0.876215674	0.801833356	0.26486482	0.920698047	0.018578402	0.129555458	0.957438382	1.040048413	0.753998082	1.218229395	0.357930019	0.545479591	0.403720086	0.13095385	0.863479098	0.079086254	2.260005272	0.074295696	0.271654134	0.204306581	1.08384925	0.705072903	0.208012145	1.695713773	0.452481933	0.319327493	0.122456346	0.289157714	0.125686511	0.363114116	0.67151998	0.372452873	0.229749775	0.326827992	0.551946261
E06000057	2013	0.501228559	0.627158464	0.666546179	0.356308254	0.190949246	0.206038902	0.667583833	1.596214773	0.322533401	0.408616868	0.246221184	0.357205379	0.405479376	0.876563973	0.820737932	0.272402963	0.943860927	0.01865126	0.126084018	1.006292687	1.047067601	0.807428135	1.268070525	0.395244408	0.573117784	0.42010384	0.12537205	0.915396397	0.074532531	2.424473383	0.072257506	0.268049209	0.223692072	1.090544622	0.732699064	0.213284388	1.717503701	0.495970925	0.323835025	0.094025625	0.316797562	0.137350374	0.368020996	0.721364392	0.371222674	0.232034152	0.329617768	0.538858735
E07000004	2013	0.491132477	0.630561569	0.65786046	0.34376688	0.203786651	0.192696201	0.685993747	1.437039184	0.307075717	0.39142366	0.22292928	0.326721267	0.425799182	0.872886482	0.79317304	0.261747999	0.889241407	0.018038229	0.133545952	0.964481644	1.04850285	0.749955198	1.217171246	0.357657865	0.538018692	0.388720244	0.126903664	0.829404043	0.090627569	2.168111125	0.072482165	0.274394637	0.204964074	1.080212949	0.700559113	0.213725317	1.585041101	0.431047182	0.326105524	0.136269955	0.283811449	0.128422683	0.379753908	0.662703417	0.362115449	0.238339242	0.337549506	0.547639565
E07000005	2013	0.539332354	0.656668109	0.689054759	0.355980126	0.220778849	0.207475705	0.724227813	1.239649769	0.31836434	0.408470416	0.231151862	0.353230967	0.443062035	0.859264298	0.820337147	0.273633681	0.947353552	0.020482018	0.138814909	0.994426527	1.066027076	0.784130297	1.245182468	0.368156513	0.572251734	0.411978244	0.142473107	0.896550738	0.086199838	2.281550727	0.073376495	0.287594847	0.215454843	1.127176178	0.707391673	0.218773604	1.818171177	0.4578136	0.333260619	0.125611492	0.296796052	0.127647283	0.400651021	0.709249034	0.368923533	0.249454311	0.354178256	0.566819626
E07000006	2013	0.515872804	0.638693905	0.672217325	0.350038203	0.212009052	0.203634758	0.704033559	1.388673719	0.314014681	0.40660323	0.235307546	0.348329716	0.428384652	0.862055823	0.803635012	0.269679292	0.923462801	0.019438529	0.130603319	0.989480411	1.071432119	0.781970529	1.25317197	0.375558933	0.562636247	0.404075286	0.133618996	0.876740434	0.089675054	2.289054393	0.072752177	0.279367534	0.214968052	1.087306018	0.709043857	0.218627738	1.694018351	0.456931662	0.333585153	0.124933251	0.300812694	0.13284922	0.402027036	0.697986483	0.365842141	0.245539993	0.347808328	0.555319933
E07000007	2013	0.483545511	0.61189893	0.645245278	0.333487835	0.208681448	0.190274201	0.680478684	1.308775417	0.292710712	0.376138209	0.213993602	0.316507059	0.424719615	0.837995004	0.768874565	0.253221648	0.850312896	0.017646412	0.129054074	0.929725068	1.015976476	0.720516201	1.173336128	0.341143213	0.523971504	0.369636716	0.12716238	0.794196556	0.093111924	2.053178501	0.069336307	0.267714381	0.198679456	1.046556652	0.664102044	0.210027115	1.527334347	0.407922154	0.321770038	0.139660927	0.271884337	0.123904037	0.381168838	0.646230583	0.344187893	0.238655409	0.334774778	0.531926656
E07000008	2013	0.447788845	0.607644789	0.613545632	0.318939012	0.195797157	0.168687181	0.636713866	1.439821155	0.275053942	0.356690785	0.196351902	0.291604707	0.406331046	0.854404827	0.74432462	0.237884964	0.813647853	0.016475056	0.125085732	0.874663997	0.969136148	0.670752476	1.116224802	0.313177613	0.487193522	0.348265769	0.114667438	0.762740787	0.09454305	2.000242245	0.072303017	0.25338065	0.183820404	0.984976189	0.646503678	0.197934049	1.400977522	0.377957957	0.308716923	0.136520341	0.253855042	0.118589621	0.353854613	0.641410521	0.353164258	0.21698689	0.314718094	0.504550082
E07000009	2013	0.505132448	0.634728052	0.659537018	0.358861077	0.196085308	0.19465072	0.667057477	1.461383776	0.318107441	0.40566385	0.229475884	0.341832251	0.411030706	0.871738413	0.814910633	0.268679299	0.944730271	0.018534481	0.131016808	0.975845684	1.04119806	0.771781345	1.229982457	0.367601804	0.553753328	0.41339868	0.130151021	0.887003888	0.072990993	2.326774038	0.07721729	0.273115305	0.209848142	1.094980578	0.717737796	0.208564432	1.712370266	0.467235982	0.31511804	0.116908431	0.295703174	0.126733128	0.356836967	0.677984953	0.377311311	0.228579943	0.324163578	0.550920454
E07000010	2013	0.490595173	0.61313933	0.651045375	0.353850653	0.188254456	0.199750576	0.657092278	1.605198074	0.316354443	0.400432829	0.23824548	0.348978524	0.399094498	0.874418229	0.808662425	0.267425654	0.924174917	0.018642128	0.118014038	0.98103021	1.032184085	0.790444181	1.241101721	0.384584626	0.558977465	0.408726862	0.122456107	0.884419353	0.073330876	2.372026783	0.070093597	0.264282501	0.215085692	1.064675269	0.722900489	0.21044172	1.665181045	0.48787045	0.319461734	0.103977306	0.307538557	0.132565925	0.353349188	0.702017503	0.371360801	0.22693385	0.317261173	0.534400457
E07000011	2013	0.4983458	0.640265258	0.660438137	0.3510682	0.19825163	0.194994596	0.674090233	1.4345009	0.311646971	0.397322348	0.226051948	0.342363418	0.420077389	0.873970921	0.812614196	0.268244688	0.927160619	0.018945979	0.125428286	0.960715671	1.036866159	0.760599137	1.222330497	0.360300858	0.545058224	0.407396609	0.131226005	0.865587068	0.077471374	2.263194793	0.07439039	0.272626393	0.207281597	1.090255446	0.712242205	0.207648375	1.720979872	0.465215795	0.318621214	0.116462622	0.289452426	0.124552135	0.35553232	0.677240676	0.374347779	0.231815206	0.32646037	0.551165327
E07000012	2013	0.510772522	0.639140398	0.664531946	0.346261243	0.209957588	0.196814979	0.697672402	1.32814336	0.308294029	0.397145962	0.222639214	0.340567334	0.434294556	0.854080768	0.804507499	0.264726982	0.920910087	0.019386064	0.130298906	0.964039679	1.041596953	0.756865252	1.213264395	0.356178599	0.544115658	0.399540894	0.134869904	0.851102091	0.086735018	2.206102211	0.074234262	0.27677884	0.206496866	1.091247407	0.696883405	0.211538265	1.703699912	0.444051478	0.325264048	0.126125246	0.284532391	0.124781317	0.375940202	0.670184719	0.369055362	0.24015332	0.341663308	0.55419319
E07000026	2013	0.508187306	0.634164446	0.668018898	0.358562333	0.196067658	0.205898574	0.672884233	1.568531828	0.322728818	0.411811948	0.244993683	0.360467706	0.408977755	0.877290242	0.820876203	0.274102276	0.951371865	0.019167913	0.127061547	1.010560209	1.046907689	0.810831258	1.271302083	0.393812707	0.575295817	0.420762795	0.127891077	0.913559428	0.073477337	2.431722113	0.070876883	0.272011768	0.22391741	1.092639009	0.729255495	0.21440103	1.751651268	0.497831183	0.325366018	0.096526174	0.314984959	0.136206588	0.367108227	0.726822933	0.372988041	0.233795588	0.333350442	0.543614179
E07000027	2013	0.475123095	0.606639924	0.636567889	0.336937324	0.183252083	0.193632725	0.640172897	1.58419117	0.312078901	0.395833109	0.235871562	0.340274923	0.386404966	0.860551633	0.776581824	0.260548298	0.894640066	0.017623743	0.122515733	0.964376253	1.021255815	0.769603193	1.225711872	0.377568341	0.544067871	0.399768449	0.118784108	0.861137536	0.074352088	2.315455556	0.069174289	0.258643414	0.212098079	1.035441859	0.704692088	0.206911414	1.598532429	0.464432433	0.315029797	0.100594733	0.305332392	0.135132285	0.352360054	0.689932647	0.360597126	0.221753574	0.31917071	0.52401694
E07000028	2013	0.480985871	0.609394659	0.64608862	0.350710035	0.184992581	0.19373786	0.642149187	1.686349233	0.31746225	0.39895702	0.236232361	0.340685265	0.390940023	0.879988076	0.799291043	0.265894332	0.907760766	0.017176732	0.127846027	0.98297227	1.023917135	0.778014135	1.237617172	0.382089889	0.550607498	0.401582645	0.119081585	0.877237822	0.073778597	2.369405665	0.071968496	0.26291638	0.213210049	1.0555305	0.722987081	0.208088571	1.602030267	0.470479202	0.314119626	0.101971468	0.307422595	0.133983561	0.359469028	0.693667154	0.368913833	0.220183563	0.315934507	0.529776882
E07000029	2013	0.505074844	0.652813297	0.661700181	0.351627245	0.19838484	0.200714033	0.68423953	1.517162699	0.311519989	0.408077199	0.234400852	0.362529343	0.424085253	0.878334893	0.806184495	0.269447258	0.944581334	0.020772852	0.124986242	0.984335161	1.044886275	0.792828048	1.255301242	0.379746841	0.563406381	0.413054724	0.130478865	0.891934177	0.07795383	2.381096819	0.071796814	0.272910472	0.21621871	1.084625504	0.71339903	0.210172462	1.790063937	0.481557412	0.32899179	0.103060862	0.29853606	0.130846684	0.365130502	0.721841348	0.377441005	0.234561901	0.340134268	0.54175886
E07000030	2013	0.528489728	0.652179263	0.6893514	0.35808542	0.202929509	0.214357583	0.68658994	1.484824607	0.325909421	0.412489729	0.248906112	0.36261326	0.422075141	0.845788843	0.8284082	0.27501776	0.966891442	0.019594416	0.143950207	1.024117539	1.043660135	0.818240737	1.275727949	0.394597114	0.59647332	0.418453267	0.1369423	0.959332386	0.075231753	2.435947699	0.073579409	0.277187231	0.234374873	1.134725723	0.717083283	0.21616837	1.824665896	0.493217014	0.326824595	0.089434883	0.319380614	0.137780158	0.403613021	0.733768966	0.358117203	0.240622236	0.350887254	0.551606178
E07000031	2013	0.552818176	0.668138632	0.712027874	0.37562288	0.213320621	0.222197207	0.715783323	1.513375492	0.333576881	0.431486144	0.255487972	0.376993093	0.436738264	0.87104451	0.855816501	0.284343671	1.007777145	0.020462475	0.143016113	1.056989276	1.07391936	0.848650545	1.310238971	0.409753367	0.623243928	0.433347378	0.1384718	0.994142788	0.074748494	2.551723783	0.074451819	0.287942427	0.241203835	1.165272097	0.733521658	0.225633342	1.913915661	0.518023737	0.34075236	0.090702015	0.328022114	0.140859754	0.418074052	0.76030805	0.372741159	0.250332001	0.360416309	0.568394992
E07000032	2013	0.505453718	0.644164089	0.673553763	0.359233576	0.198642325	0.202315193	0.681765675	1.531018398	0.317054898	0.405046908	0.234138286	0.356781926	0.424912081	0.88388262	0.831508384	0.27348283	0.950002599	0.019218041	0.125489951	0.986703274	1.042258623	0.786265719	1.247720785	0.375755133	0.565068839	0.418634053	0.130806897	0.899912573	0.075744013	2.355176589	0.07393003	0.273873581	0.216539067	1.107436334	0.724509356	0.213066982	1.76691629	0.487070642	0.324089048	0.104475156	0.30097494	0.12872899	0.361504526	0.700140385	0.371719373	0.235183866	0.329866507	0.55479078
E07000033	2013	0.480098836	0.616686058	0.64532329	0.347913532	0.185470694	0.194314041	0.648082608	1.659472509	0.315333286	0.396624752	0.234987605	0.342841766	0.396494248	0.886265849	0.803069324	0.263650526	0.914726825	0.017624175	0.124065015	0.980233043	1.035737122	0.779604811	1.23883607	0.378540224	0.551655768	0.407809981	0.12064088	0.882063146	0.072469616	2.367271971	0.071308691	0.264560349	0.212343898	1.064525757	0.726961191	0.207850251	1.631047965	0.481223393	0.313822572	0.10118858	0.303975476	0.132408633	0.349797619	0.692013758	0.373497093	0.222388418	0.313629086	0.534096131
E07000034	2013	0.476993241	0.608894196	0.639648838	0.346565057	0.183973254	0.195191774	0.639153504	1.666693682	0.317857837	0.398393931	0.238019639	0.346508806	0.388726087	0.886033027	0.800735373	0.266679171	0.908329531	0.017486217	0.116941957	0.986957052	1.033214901	0.787159673	1.249781749	0.384098243	0.548884076	0.408321659	0.11549633	0.873707429	0.072511379	2.386451973	0.07228319	0.260885722	0.214164795	1.051817979	0.735823824	0.206362769	1.605068608	0.48635368	0.311957834	0.096031077	0.308793052	0.134245175	0.337746765	0.695072251	0.376547516	0.220746419	0.310232856	0.527383772
E07000035	2013	0.538218246	0.659783221	0.699013756	0.363645904	0.208309702	0.218296672	0.706074642	1.487591719	0.329823874	0.422115974	0.252546547	0.375971479	0.430437354	0.854324641	0.836723033	0.282424817	0.988305454	0.020067955	0.137207501	1.034807383	1.066287422	0.834771807	1.293439458	0.401982255	0.604705341	0.428879954	0.140093537	0.954772847	0.076346801	2.474949419	0.072828007	0.280872882	0.236531826	1.142632214	0.727789291	0.222298763	1.889669181	0.512291041	0.335519941	0.085222644	0.322655554	0.138400515	0.404427568	0.750342176	0.367334837	0.248381902	0.354260123	0.563460252
E07000036	2013	0.495134277	0.63061259	0.654648455	0.352517108	0.191438454	0.194046555	0.662807778	1.580440179	0.319620509	0.405780902	0.233710697	0.347013236	0.407441473	0.896782973	0.815253593	0.269576313	0.934477427	0.018605899	0.129535595	0.987814045	1.042325652	0.781724875	1.246402482	0.376838204	0.554309378	0.411882096	0.124704795	0.886151443	0.075588092	2.370015852	0.073317107	0.269151066	0.212314551	1.076838622	0.728885367	0.208597939	1.671957751	0.472720439	0.320147877	0.108355377	0.302117893	0.132527186	0.355632643	0.694644385	0.381552111	0.225082047	0.326185137	0.542996286
E07000037	2013	0.497057112	0.633249235	0.661381761	0.355475532	0.192369745	0.197483971	0.66528058	1.609075386	0.320481821	0.403777279	0.236415538	0.350931687	0.410205579	0.889145777	0.814826552	0.271743333	0.935139346	0.018889116	0.127542646	0.99654468	1.04983996	0.78831577	1.258174255	0.380882031	0.557409033	0.415079586	0.125479901	0.897077083	0.076590395	2.365161299	0.072344236	0.272181075	0.215940186	1.090130412	0.730899663	0.21045539	1.687797715	0.481343524	0.321612598	0.104081038	0.303647124	0.132977872	0.358722705	0.68712729	0.375434218	0.228227822	0.32603388	0.548592619
E07000038	2013	0.5057572	0.633764689	0.672633449	0.357068404	0.19621101	0.209563307	0.680684124	1.565824512	0.318121824	0.407171695	0.246341667	0.360124503	0.413608137	0.87377482	0.819561942	0.270868928	0.941819414	0.019031695	0.123068617	1.00308897	1.054513328	0.812194747	1.269971767	0.396636017	0.576502899	0.415460518	0.126772485	0.905033427	0.077686003	2.407531852	0.070956837	0.271720748	0.22548851	1.095813501	0.730201614	0.216421112	1.745797521	0.498450954	0.328848416	0.096449581	0.315182699	0.13681992	0.370719189	0.721948514	0.374613338	0.238696855	0.329880074	0.544751765
E07000039	2013	0.49935649	0.641553926	0.658056936	0.357915238	0.19489767	0.19371563	0.667335987	1.515495243	0.318952347	0.405967043	0.229390258	0.347727517	0.414393615	0.896378581	0.818082917	0.271354969	0.94405121	0.019263239	0.126728899	0.986775591	1.053193868	0.777368031	1.247824139	0.369399909	0.548454983	0.417342403	0.128755898	0.882134995	0.074243699	2.340675264	0.075770456	0.273733668	0.207859738	1.095747049	0.732983317	0.20739002	1.720462952	0.477932372	0.317121325	0.116763144	0.29399704	0.128403729	0.344658619	0.673099511	0.386928733	0.226281467	0.321101586	0.555732176
E07000040	2013	0.562882156	0.656153712	0.720197108	0.383575213	0.21612938	0.232113018	0.730337753	1.530203544	0.34125177	0.440858555	0.268325147	0.388813898	0.43327398	0.881936347	0.872095952	0.292115382	1.008994516	0.020839966	0.137145972	1.082085395	1.099264687	0.880001807	1.345090322	0.433101997	0.63968895	0.439265236	0.13736986	0.990181014	0.078707616	2.598682198	0.073194407	0.291241763	0.252693309	1.160908003	0.748490488	0.234842918	1.890335683	0.531557969	0.352656118	0.098525145	0.348623197	0.148053285	0.430544429	0.787687531	0.37497193	0.259279117	0.361110206	0.565764231
E07000041	2013	0.451016905	0.59655463	0.626619858	0.330031384	0.188584073	0.181287907	0.6411623	1.556339663	0.292732021	0.367415171	0.211696115	0.307465004	0.397884354	0.852828821	0.767553152	0.247474745	0.828834223	0.016541662	0.119358866	0.912632576	0.990549354	0.712587566	1.158252672	0.341817538	0.510205095	0.363725714	0.112573429	0.788606948	0.087519309	2.095644756	0.070790587	0.252951586	0.197035023	1.000230002	0.672129589	0.206252747	1.409411006	0.419147559	0.315240591	0.117569652	0.274084117	0.123928299	0.353820337	0.639041458	0.345920917	0.221749318	0.307880663	0.51670575
E07000042	2013	0.520079099	0.640463073	0.680999608	0.374732827	0.194080644	0.210185033	0.679183317	1.615655105	0.331999337	0.418764683	0.248684013	0.36373805	0.414187575	0.890747024	0.840404121	0.280593472	0.967979894	0.019041324	0.133804301	1.032248867	1.067996897	0.824502398	1.291269134	0.399379764	0.591377846	0.429438188	0.13074929	0.943016488	0.073883268	2.477209722	0.075095921	0.276953136	0.229901969	1.123004233	0.747245823	0.216980256	1.750531974	0.50717958	0.326395825	0.10254399	0.3225704	0.138300794	0.381930647	0.717872148	0.375750632	0.234435894	0.335814399	0.559755423
E07000043	2013	0.521775194	0.63371264	0.680935283	0.366677805	0.196335986	0.214719547	0.680949224	1.630015541	0.33319583	0.421644982	0.254723334	0.363129212	0.409542867	0.873781528	0.835150015	0.278398408	0.963407154	0.019099423	0.134423848	1.03739333	1.06357314	0.831339161	1.2987821	0.410387088	0.597024423	0.422658397	0.127875623	0.936847128	0.074989518	2.481595868	0.072296695	0.273395494	0.233608639	1.117144955	0.737329685	0.219192434	1.732321002	0.501236441	0.329742698	0.095983391	0.328590351	0.143787707	0.394946032	0.739881965	0.370213465	0.23762823	0.343206833	0.548020454
E07000044	2013	0.563692187	0.677116773	0.726349403	0.379254189	0.216616251	0.228230792	0.729391751	1.516996147	0.34329648	0.434012648	0.263187132	0.385833013	0.444291966	0.879120725	0.877263856	0.294720369	1.023829228	0.02110896	0.139720197	1.07740956	1.094193295	0.859972436	1.331837367	0.416785993	0.637048852	0.44141979	0.141169792	0.989608105	0.078155641	2.551811368	0.074847004	0.292990861	0.248310142	1.189420715	0.753324949	0.229281811	1.930910099	0.530032628	0.345098268	0.089898339	0.332339903	0.142592431	0.420091035	0.761760933	0.373453744	0.257942767	0.366782577	0.580480905
E07000045	2013	0.548194239	0.663671428	0.710944213	0.381077278	0.208560524	0.222840701	0.711519737	1.577645456	0.34151707	0.435342411	0.259048742	0.380354032	0.43265755	0.894534883	0.865159204	0.289371107	1.00624517	0.020732892	0.135813927	1.0687937	1.091537741	0.856500663	1.329597159	0.416749831	0.618630143	0.441426795	0.135080439	0.982260736	0.075690399	2.561974159	0.075712304	0.286877555	0.241409751	1.167603379	0.75620579	0.226613187	1.86162515	0.528283626	0.34156164	0.09622405	0.333415093	0.143309095	0.403448605	0.754655775	0.377691469	0.249101862	0.35349147	0.572234248
E07000046	2013	0.533681464	0.646627946	0.695944829	0.372327778	0.199241064	0.222287846	0.691524288	1.624360328	0.335474243	0.428003784	0.261623814	0.376994147	0.415397827	0.871979225	0.841777366	0.281230918	0.98450738	0.019778126	0.140744515	1.056186061	1.072503132	0.852104438	1.321531636	0.420418305	0.614816765	0.433903606	0.132999005	0.977264435	0.074833398	2.55386294	0.071586982	0.276657479	0.241058717	1.138591548	0.740814597	0.222782378	1.816959901	0.516716322	0.335505628	0.088199179	0.338944722	0.146847713	0.411672513	0.777681126	0.368295712	0.241648956	0.352965227	0.552095102
E07000047	2013	0.546913336	0.665691352	0.710294638	0.378806906	0.207526776	0.225813054	0.716662054	1.538766368	0.336926344	0.431331093	0.261672895	0.382736765	0.434677788	0.880005725	0.860487149	0.284946756	1.002516278	0.02032511	0.138348113	1.064980599	1.095433055	0.859351071	1.333047672	0.418116129	0.623168912	0.437283868	0.137442592	0.985696751	0.077292713	2.545999171	0.074375244	0.285769884	0.242393189	1.170996269	0.75316814	0.22755299	1.898836358	0.52414741	0.343231475	0.095079017	0.336712281	0.144211212	0.415087147	0.766568227	0.373865114	0.251323373	0.360306728	0.568023279
E07000048	2013	0.546185806	0.630110296	0.695760335	0.375534232	0.211742883	0.229817734	0.712685018	1.503590381	0.328600953	0.430514237	0.26306473	0.375890251	0.419404925	0.846713136	0.839829756	0.284109685	0.965857373	0.02113552	0.121410708	1.053696958	1.078880667	0.862655067	1.315980701	0.429680518	0.623472828	0.420242061	0.126631736	0.94929284	0.079776294	2.516693752	0.068616063	0.281887016	0.247213035	1.101213606	0.72862856	0.229975086	1.770142215	0.525665089	0.346630499	0.094429698	0.338980621	0.146722183	0.412177872	0.785262382	0.359562585	0.254025309	0.352019056	0.549139594
E07000049	2013	0.568801705	0.671217245	0.723005109	0.381876339	0.218764782	0.234404683	0.739200485	1.395668606	0.337287845	0.439050233	0.263917639	0.390405318	0.441831297	0.861327182	0.871332732	0.291911225	1.017160215	0.021731207	0.136845277	1.071177096	1.089855814	0.874802164	1.329603424	0.424003287	0.639443325	0.439394817	0.141885198	0.990556122	0.078306288	2.543680309	0.072761042	0.291904812	0.252326856	1.189799648	0.736434146	0.230950693	1.952886325	0.527472187	0.349295065	0.09151485	0.344340361	0.143746533	0.431881121	0.78538422	0.365661511	0.261779297	0.369556878	0.56939522
E07000050	2013	0.534227664	0.650977083	0.697566446	0.378593188	0.20406735	0.217718594	0.700643015	1.590380664	0.33459996	0.424047084	0.252263606	0.369503949	0.425969286	0.8885551	0.853385693	0.281905415	0.978566923	0.020282847	0.133626671	1.047327976	1.074166324	0.838948601	1.305950495	0.405082745	0.603884867	0.431717047	0.130494347	0.951581654	0.075927418	2.490118603	0.073325281	0.281963326	0.237728574	1.154780967	0.745150893	0.224001659	1.803134684	0.516412809	0.335538545	0.103523522	0.322832838	0.139768887	0.397987502	0.730764489	0.373629396	0.242603144	0.349296843	0.565120671
E07000051	2013	0.532738869	0.642280581	0.695521912	0.370571251	0.20640221	0.221961255	0.704669222	1.610862183	0.329988813	0.423849768	0.2566776	0.37544447	0.424085543	0.875936179	0.84241262	0.282710635	0.962124704	0.021032004	0.126848653	1.046839253	1.074630416	0.847283431	1.308511606	0.41672685	0.603705163	0.426909905	0.127285696	0.944345518	0.07880785	2.482435362	0.070936565	0.279044451	0.241559931	1.125096843	0.742180825	0.226508822	1.772247482	0.52110319	0.340931309	0.097247966	0.332497195	0.142268247	0.399811938	0.747421548	0.366234398	0.247756328	0.346410161	0.551308601
E07000052	2013	0.570745973	0.675761424	0.731024768	0.385435775	0.216450744	0.232522217	0.739931024	1.500822991	0.340739582	0.437445527	0.26536868	0.384730434	0.446588433	0.890788579	0.871951872	0.292612503	1.015695936	0.021064704	0.146046871	1.08098073	1.098696231	0.87218421	1.335268327	0.425817065	0.646422703	0.435110524	0.142067686	1.003436	0.080823407	2.577722796	0.073840862	0.295492748	0.254476969	1.184340364	0.740074635	0.233963208	1.928871454	0.523865914	0.352688834	0.098688539	0.341608245	0.1467498	0.443947316	0.785921844	0.370230127	0.26290297	0.371535948	0.571033321
E07000053	2013	0.502458265	0.623056322	0.672527061	0.361114997	0.193469651	0.208994786	0.67337689	1.695699511	0.325431798	0.413449558	0.252403576	0.360580723	0.403243723	0.889681507	0.826585591	0.275783239	0.934491658	0.018149946	0.124085012	1.018843501	1.057132486	0.818469782	1.286103626	0.407414212	0.580165499	0.416190357	0.122335235	0.911491538	0.078401323	2.444948061	0.070705386	0.270058275	0.228781861	1.086078599	0.737082407	0.218981488	1.674640359	0.498437509	0.332876725	0.098844054	0.327874196	0.142596154	0.379936614	0.733029512	0.369034898	0.235622132	0.328988943	0.537387782
E07000061	2013	0.500689973	0.616812293	0.66264553	0.357759158	0.19659569	0.202599551	0.667290467	1.572658635	0.317450919	0.404430117	0.2391603	0.341169495	0.405659861	0.871556827	0.804613752	0.268146246	0.912918833	0.018257051	0.127326432	0.990792036	1.038161262	0.786724412	1.241986383	0.384060306	0.570294607	0.399500125	0.11972138	0.8855311	0.077830466	2.377311087	0.072146364	0.270233918	0.221582383	1.063234326	0.708251051	0.217041508	1.61571047	0.473126289	0.326434845	0.106503511	0.30723959	0.135960754	0.381000909	0.706619524	0.362478776	0.233325377	0.328597041	0.53698791
E07000062	2013	0.467608696	0.602244422	0.638636202	0.348014386	0.180958012	0.188657905	0.635453255	1.772332459	0.318801459	0.396881343	0.235140051	0.333972817	0.386742629	0.899441498	0.793579005	0.263386627	0.89017584	0.016570024	0.127929011	0.979293664	1.025456328	0.766944569	1.233438263	0.37881762	0.538032303	0.397342858	0.111920864	0.859263221	0.078161165	2.352523388	0.071553921	0.260927569	0.209908679	1.039512813	0.721809885	0.20845513	1.518430515	0.459371253	0.315521109	0.110920608	0.303321803	0.137056998	0.356480713	0.674983808	0.369020753	0.217648578	0.311747194	0.526421816
E07000063	2013	0.528824043	0.64217514	0.687086331	0.364835908	0.206376611	0.212862228	0.701467336	1.510924488	0.324620777	0.418352043	0.249210333	0.359495491	0.421064087	0.872869104	0.824421506	0.276156517	0.9519692	0.019651268	0.13613944	1.024812717	1.068992671	0.81701724	1.28167907	0.399426139	0.595337181	0.412957056	0.130642896	0.92070998	0.08146389	2.426185236	0.072665155	0.281448635	0.232243143	1.110134378	0.720972956	0.222648363	1.75282289	0.485511437	0.335972423	0.10891874	0.32082496	0.139685919	0.40789212	0.730681032	0.365778041	0.246152466	0.349205104	0.552039628
E07000064	2013	0.550990244	0.641424381	0.705469807	0.376858637	0.209298549	0.230410448	0.712475261	1.565048075	0.336284069	0.434000949	0.266807554	0.382176896	0.42194687	0.851220478	0.841203727	0.286894563	0.984157443	0.020587611	0.133462595	1.067297416	1.074345115	0.870639991	1.325905164	0.433803216	0.630147787	0.428006465	0.131331797	0.960505093	0.079019795	2.553029914	0.068591249	0.281129019	0.251294481	1.136142504	0.72645941	0.232356834	1.814910695	0.521609721	0.349645384	0.091648374	0.34517045	0.149429469	0.428447579	0.780594381	0.359378102	0.253468487	0.35873017	0.550341258
E07000065	2013	0.553465688	0.665960344	0.705768242	0.373718381	0.210425742	0.219582644	0.716280014	1.426627783	0.339876925	0.430694478	0.252543909	0.374564037	0.437363452	0.867926776	0.85217775	0.287001427	1.002466706	0.020757446	0.13949093	1.051363195	1.072185255	0.839148179	1.302561657	0.403078441	0.611434719	0.433016564	0.138128922	0.960706683	0.076214334	2.487989692	0.074665549	0.287108701	0.236617676	1.176352323	0.736823687	0.222833595	1.87888908	0.507359515	0.336037042	0.098413927	0.322600862	0.137235665	0.407534005	0.732442189	0.372694421	0.247666411	0.357994961	0.573993981
E07000066	2013	0.470864104	0.609308196	0.629044914	0.336514943	0.188856284	0.184991587	0.650353843	1.466530848	0.302121897	0.387724487	0.221638747	0.322995417	0.395592733	0.86766006	0.76998232	0.256051183	0.873119694	0.017942036	0.120089735	0.940694709	1.023893341	0.735079108	1.192695455	0.353981863	0.523187906	0.385357152	0.118210122	0.818501415	0.08212464	2.185909604	0.070505056	0.26204293	0.197862439	1.028757969	0.693548536	0.205788322	1.527215777	0.436236453	0.315105016	0.128229264	0.284467958	0.126662663	0.348922692	0.644960013	0.361964642	0.222826298	0.314716055	0.531692963
E07000067	2013	0.497284981	0.636814463	0.652820982	0.351336878	0.19441743	0.193160172	0.666091065	1.464378113	0.313689756	0.403103137	0.228181486	0.342150833	0.40791813	0.872041915	0.807435908	0.269675282	0.936082792	0.020118766	0.123438542	0.967135101	1.036620389	0.766045367	1.230321865	0.365074447	0.547352994	0.409734783	0.128101229	0.862191568	0.074623107	2.314554642	0.074643648	0.271698892	0.206666167	1.076582137	0.710923843	0.205548908	1.702883543	0.466470915	0.317636751	0.111800867	0.291445325	0.127261146	0.346673528	0.683516901	0.377897824	0.230138733	0.321589573	0.546213082
E07000068	2013	0.527533323	0.669078485	0.686242485	0.357779083	0.211464676	0.204730016	0.714982446	1.268208818	0.312552978	0.404904251	0.226427769	0.353443053	0.454956519	0.862539701	0.827460307	0.267703834	0.954411346	0.021713807	0.139096195	0.97824456	1.047854812	0.769961199	1.233020021	0.359694577	0.570064131	0.404793568	0.141859131	0.896408403	0.082561943	2.288920445	0.076405394	0.281049468	0.213799616	1.123799174	0.700335268	0.212780724	1.842432868	0.456821418	0.327849649	0.111553524	0.28916637	0.125955338	0.393994259	0.706618288	0.376052031	0.240453244	0.35733312	0.559735403
E07000069	2013	0.51637537	0.642099428	0.674682767	0.356726406	0.202170439	0.211262718	0.692125068	1.464243017	0.315826383	0.405876315	0.241060961	0.36093527	0.423084253	0.862644913	0.822482652	0.27345282	0.94588952	0.020165881	0.126432807	0.992176083	1.043946655	0.803168236	1.256455383	0.387116221	0.571970293	0.414453087	0.131275919	0.890843277	0.079868157	2.343603522	0.070716033	0.273464084	0.225488836	1.10336889	0.711895182	0.21545148	1.761844287	0.484734158	0.331673189	0.099939095	0.309064993	0.134255856	0.380054976	0.724144211	0.365316267	0.24204882	0.340590801	0.544348932
E07000070	2013	0.50152591	0.642277529	0.656509361	0.351896425	0.200613996	0.194061456	0.676273805	1.39885921	0.311296943	0.397240352	0.223904613	0.339905527	0.421689882	0.870649829	0.807002845	0.264977064	0.925715386	0.020428194	0.127504573	0.966588684	1.034156879	0.758434683	1.218242469	0.356346267	0.543849743	0.404040403	0.12775631	0.864257679	0.078969624	2.260549972	0.077214141	0.27180925	0.206475757	1.088093137	0.705363166	0.207246831	1.707192511	0.457276684	0.319097298	0.115179344	0.285400829	0.124314219	0.358052024	0.671718623	0.373781725	0.231720035	0.331383089	0.550779654
E07000071	2013	0.476035252	0.617541951	0.638630039	0.347014803	0.190265951	0.186401108	0.64669983	1.505370283	0.306789923	0.39045979	0.221034987	0.325767149	0.404082064	0.879515581	0.796108522	0.260074192	0.88889555	0.017661131	0.124453974	0.950708314	1.021541491	0.740736546	1.197645125	0.353845165	0.529445764	0.39019233	0.120836377	0.834247999	0.078725814	2.213398869	0.073075912	0.261731637	0.201188863	1.048595387	0.701770412	0.204891768	1.5723776	0.444398885	0.314008722	0.12056757	0.281612001	0.125923194	0.344686328	0.653816841	0.36671571	0.221754734	0.316077984	0.534726095
E07000072	2013	0.519715445	0.650647294	0.676919257	0.355982231	0.208441934	0.198850983	0.696255875	1.368549702	0.314772348	0.405739378	0.226942116	0.34484677	0.43467592	0.867852617	0.816516641	0.268884429	0.941791703	0.019716361	0.136631017	0.977422683	1.041207715	0.766459535	1.228376624	0.362005216	0.558501808	0.406528727	0.135646715	0.883463535	0.08189981	2.287274152	0.074650153	0.27720527	0.211707808	1.108129245	0.699985791	0.211649148	1.747805351	0.454333101	0.325551013	0.119422569	0.291067378	0.12695186	0.383500107	0.688779004	0.368779234	0.236260532	0.342804973	0.558649682
E07000073	2013	0.455568498	0.586463383	0.618446965	0.334818947	0.180412711	0.177383649	0.624469964	1.518963558	0.299179681	0.379896002	0.218441246	0.304520669	0.374958412	0.868408155	0.753275048	0.250450169	0.84977116	0.016076841	0.124114418	0.922996027	1.00458323	0.715288833	1.165665637	0.34635545	0.513449534	0.376959114	0.112466005	0.807736623	0.076422131	2.172460934	0.071370982	0.25476196	0.194236629	1.004383649	0.68767446	0.201399434	1.435927562	0.422814992	0.30211698	0.129571995	0.281525235	0.124954256	0.343356586	0.63628952	0.352571964	0.213668807	0.300723829	0.518061424
E07000074	2013	0.53798487	0.675353121	0.693279673	0.358542679	0.210782502	0.212070561	0.716373968	1.402154859	0.322229735	0.418952022	0.24258215	0.367426788	0.440368995	0.872241445	0.829338506	0.279653163	0.984806948	0.021192341	0.138016157	1.015473845	1.064269699	0.811008129	1.276606882	0.385545737	0.58969734	0.42190406	0.14230149	0.924085973	0.081393029	2.39695384	0.072983048	0.285311815	0.226063682	1.150400132	0.716368686	0.218159365	1.894103582	0.485479443	0.337397	0.104021308	0.306925924	0.13378285	0.398181546	0.736115669	0.373583626	0.248919199	0.363429581	0.566365424
E07000075	2013	0.532937741	0.658111701	0.686933256	0.364937712	0.204312413	0.208144996	0.697398713	1.427657369	0.329746765	0.421061585	0.243165313	0.360240801	0.425460966	0.891395426	0.839764644	0.280685361	0.985032915	0.020070489	0.142905155	1.020470463	1.058589898	0.808542699	1.276742322	0.389645397	0.589704086	0.424334101	0.139512771	0.925680489	0.076121221	2.428813269	0.075129476	0.28076106	0.224374942	1.156002266	0.730176806	0.214429926	1.839454518	0.484041604	0.328594777	0.104403767	0.313483782	0.133386365	0.391522213	0.731321802	0.380476944	0.237987878	0.346874467	0.562922169
E07000076	2013	0.522253532	0.619366959	0.675277973	0.362151397	0.198260655	0.217870223	0.680140117	1.496020231	0.322012477	0.415369638	0.253945169	0.365723274	0.4064259	0.838619873	0.816378108	0.276933786	0.945150849	0.019289366	0.124524125	1.013729328	1.035180914	0.826848757	1.271299806	0.410418387	0.596671657	0.411312371	0.12676417	0.91359016	0.07487872	2.441715382	0.066493532	0.268948688	0.236225429	1.082218883	0.705606209	0.219980654	1.749660444	0.499892779	0.333060883	0.091355214	0.324536624	0.14226542	0.394671658	0.753057426	0.352989803	0.240813544	0.339661987	0.528726907
E07000077	2013	0.517789118	0.648857239	0.669809106	0.35910928	0.200846859	0.198495016	0.684304902	1.371505003	0.327247799	0.409827592	0.230703562	0.353410572	0.422030197	0.877472948	0.830857059	0.27507067	0.962600638	0.020002435	0.131736631	0.990868756	1.054267521	0.782219152	1.248112436	0.365972703	0.561392663	0.424062331	0.134388112	0.900881245	0.073519136	2.351618612	0.078461007	0.280848605	0.211110206	1.127260415	0.730651222	0.208580134	1.810438787	0.479060838	0.316922405	0.109580889	0.295493967	0.124598806	0.359248038	0.672236458	0.381569569	0.234760883	0.331297359	0.566439493
E07000078	2013	0.48414303	0.633445678	0.652923435	0.344749592	0.198443382	0.190340241	0.664297393	1.52979325	0.307514654	0.390438827	0.222119808	0.333051061	0.416678913	0.874890011	0.803202856	0.261605317	0.904180004	0.018966101	0.120529576	0.952675764	1.029676675	0.752108269	1.211762533	0.354935344	0.537278903	0.394780069	0.12139977	0.854648766	0.080362749	2.270695877	0.077342403	0.267321529	0.203826237	1.047155703	0.706065863	0.207771891	1.625337001	0.455529072	0.31937379	0.106559323	0.28647552	0.125988796	0.348793456	0.685184631	0.377682067	0.229552947	0.322878302	0.541937715
E07000079	2013	0.549458396	0.673934525	0.715759626	0.378596248	0.209478131	0.222566751	0.717004396	1.563647432	0.341975065	0.431352104	0.259491324	0.375923601	0.435766777	0.89638328	0.865336709	0.288297369	1.003811872	0.02041291	0.144799248	1.069220682	1.093729951	0.853067301	1.329531858	0.412560666	0.623188167	0.437904911	0.137454362	0.982871857	0.078632442	2.55153934	0.075753518	0.2892352	0.242514173	1.17644171	0.757357015	0.227076116	1.866840635	0.516925924	0.341524862	0.096802013	0.333971445	0.143514604	0.41593377	0.761795599	0.380089416	0.250055737	0.362631702	0.575176509
E07000080	2013	0.533404542	0.663436988	0.696851937	0.37453546	0.205477436	0.216998097	0.707835016	1.599004415	0.332905303	0.431191387	0.256872438	0.377914147	0.428657855	0.906447068	0.851707221	0.28534025	0.99141819	0.020044763	0.135389836	1.052110475	1.094895281	0.847279142	1.327431256	0.413065701	0.603366701	0.438277799	0.135012299	0.955332098	0.078837768	2.529653065	0.073183199	0.284386416	0.234394277	1.142417773	0.754021751	0.223681952	1.834555677	0.514252364	0.342524005	0.1046923	0.329731326	0.142871637	0.396898534	0.760817887	0.385071603	0.245326978	0.353221788	0.565500602
E07000081	2013	0.456432827	0.600313834	0.630413018	0.340076067	0.184826753	0.182021288	0.637578482	1.563047492	0.304527096	0.377469081	0.218794823	0.312217196	0.390278268	0.88729537	0.770862561	0.255213527	0.848321331	0.016493754	0.11946138	0.934924729	1.027800262	0.724961675	1.184710684	0.350275663	0.518271815	0.381397664	0.11351116	0.80534902	0.082902771	2.143886029	0.071651615	0.257640154	0.198234683	1.024560924	0.700774747	0.207303589	1.454292121	0.431485386	0.312704015	0.133247964	0.282132432	0.125236034	0.347226636	0.630362142	0.35497897	0.220945126	0.305578163	0.530307033
E07000082	2013	0.539045534	0.665618584	0.70069182	0.366445431	0.209901597	0.211936105	0.709011516	1.452892564	0.332909199	0.419612834	0.244118973	0.364070276	0.437469961	0.878498973	0.850165423	0.28056954	0.985210902	0.019982228	0.140523239	1.028425822	1.067951398	0.816239806	1.283220389	0.386726229	0.596267905	0.426336793	0.13878469	0.944842105	0.077624503	2.433215054	0.076402819	0.285728831	0.228151281	1.157799401	0.735364936	0.21921113	1.860659085	0.493063992	0.331098365	0.102853011	0.312272879	0.133091683	0.397047945	0.723951289	0.375300194	0.245928386	0.351891864	0.572607723
E07000083	2013	0.522762752	0.65008155	0.684002931	0.36567419	0.203642545	0.210105928	0.693203804	1.541785273	0.329859862	0.424052585	0.246550029	0.364466657	0.423851527	0.886289257	0.845665356	0.277099747	0.973039949	0.019831716	0.127902718	1.028943742	1.083026206	0.82719304	1.296934866	0.396377764	0.58179733	0.42936161	0.12960093	0.936829191	0.075054994	2.460827216	0.075475877	0.28225075	0.225606371	1.112916295	0.746434741	0.219233087	1.777549172	0.50644743	0.332168517	0.104912242	0.316028642	0.13760695	0.377912381	0.725702958	0.380442186	0.241036725	0.342289938	0.562830979
E07000084	2013	0.499182695	0.648749227	0.664105753	0.34785635	0.205473841	0.189932511	0.69172353	1.416027559	0.305721546	0.397327821	0.219025967	0.33107938	0.430838886	0.882997925	0.805577075	0.263915738	0.913210916	0.019329223	0.130216462	0.960694198	1.049444428	0.747008271	1.211597057	0.350179364	0.539604145	0.397866983	0.129645412	0.83821607	0.085337617	2.204409018	0.07520852	0.278246356	0.202392539	1.08777467	0.702712811	0.211939653	1.666533987	0.441957319	0.326162131	0.133985704	0.279601032	0.122906014	0.367113695	0.661302806	0.374325584	0.238080389	0.3361385	0.557329168
E07000085	2013	0.544525788	0.674704574	0.69802469	0.37019718	0.214196224	0.212344151	0.71724234	1.393616379	0.331626102	0.425929999	0.243071475	0.369756564	0.439535606	0.894852205	0.851094291	0.285184042	0.995260409	0.02066571	0.135999564	1.03092729	1.085097142	0.817923601	1.295186743	0.388721966	0.589278338	0.437009174	0.140308141	0.942258562	0.077878906	2.437335135	0.075498332	0.289560268	0.224626622	1.166329317	0.743531179	0.218912779	1.886902697	0.497158012	0.335289019	0.110640102	0.313834452	0.132983694	0.386011741	0.72210669	0.386519163	0.245317139	0.351668474	0.581478154
E07000086	2013	0.499943793	0.636420458	0.657603105	0.355781411	0.196330578	0.195425933	0.672979082	1.536395816	0.321012108	0.410087357	0.235129127	0.346664585	0.411297397	0.901782231	0.817397287	0.272296608	0.932827179	0.018815675	0.125638421	0.995328468	1.067832893	0.783063792	1.261072027	0.377203394	0.554086024	0.411586441	0.12529311	0.871924391	0.080731822	2.342748098	0.074254412	0.273666352	0.211830515	1.082437513	0.734732493	0.211752143	1.65127372	0.468671105	0.325592301	0.122186366	0.304309498	0.133741005	0.357965146	0.68203404	0.38416063	0.230610667	0.328333492	0.554167061
E07000087	2013	0.530162232	0.661283377	0.690130688	0.3668503	0.20932856	0.210945528	0.704825942	1.488539472	0.327080568	0.420112622	0.245032926	0.369359159	0.430733587	0.900951802	0.851451008	0.282430742	0.980156289	0.020575811	0.12772338	1.025341446	1.08459295	0.819097506	1.293426536	0.391824479	0.588348219	0.431695366	0.135667825	0.929244921	0.077933531	2.443850774	0.074760726	0.2855062	0.22531185	1.13764616	0.746789923	0.219739405	1.838484022	0.506823863	0.334330854	0.106102174	0.315516433	0.134432829	0.37705706	0.732891973	0.387699352	0.245555726	0.343808799	0.569676611
E07000088	2013	0.48258964	0.615173778	0.640196552	0.352387116	0.186177924	0.19191571	0.647088	1.629976899	0.318125665	0.403976489	0.23324277	0.339947825	0.394491087	0.891285905	0.803421374	0.266004818	0.913993491	0.01767793	0.120609003	0.981026609	1.04211347	0.776458531	1.240748626	0.375334216	0.544884003	0.406391702	0.119357809	0.866579787	0.073546538	2.3500891	0.071361443	0.265541444	0.208251686	1.048929376	0.725198992	0.20815123	1.591687584	0.468896183	0.315481521	0.115631158	0.300389408	0.132897463	0.343099339	0.680019843	0.374681508	0.222450112	0.317406697	0.536056394
E07000089	2013	0.529610097	0.668943599	0.682282361	0.358126867	0.212166054	0.204484112	0.715181092	1.326180449	0.319901862	0.413325238	0.2310095	0.357628982	0.443513835	0.866019138	0.827313901	0.272732882	0.969452988	0.021127132	0.133732674	0.991108619	1.067696188	0.78375013	1.257516055	0.365672032	0.561596432	0.417565103	0.139209391	0.89421326	0.082103268	2.300301331	0.076398712	0.285170841	0.210119242	1.129903831	0.720491547	0.213074578	1.833392127	0.468420897	0.33037428	0.122702838	0.291210058	0.126196298	0.375194594	0.687468403	0.384378059	0.24179133	0.348462074	0.575933557
E07000090	2013	0.515127028	0.634078118	0.670631608	0.35891285	0.198848886	0.206989864	0.683340058	1.517244318	0.320868197	0.410159117	0.242157712	0.354115041	0.416765091	0.878431756	0.81567291	0.273058492	0.943883213	0.019097202	0.132451515	1.005357236	1.049006363	0.801019153	1.260782632	0.390418936	0.577665506	0.411443534	0.129062905	0.91076314	0.077666021	2.393865299	0.070707574	0.274402122	0.223350049	1.097922019	0.719197537	0.216027889	1.730022426	0.480000683	0.328363026	0.107984604	0.311767999	0.135730453	0.387554157	0.720348142	0.369151787	0.235919633	0.337921869	0.542178529
E07000091	2013	0.553610432	0.667457397	0.710887303	0.378835004	0.21403722	0.222017565	0.722335434	1.444735985	0.332438684	0.428834304	0.252804511	0.377505398	0.438901719	0.874338444	0.854240526	0.286055312	0.995030708	0.021401562	0.136606219	1.04598416	1.074389796	0.842814943	1.300403505	0.405146082	0.618653928	0.429888029	0.136901027	0.959888706	0.077763118	2.485864532	0.074470466	0.288759045	0.240943574	1.166018083	0.728153365	0.226714136	1.87052565	0.509549761	0.34138343	0.100489894	0.324467045	0.138216211	0.413098975	0.748416678	0.368001836	0.252351147	0.35903687	0.569053171
E07000092	2013	0.451660246	0.601625796	0.618039196	0.329219979	0.187027187	0.175930379	0.644426869	1.480836094	0.292393602	0.375716487	0.209537209	0.302482897	0.396998023	0.877316683	0.756597848	0.248191559	0.834813001	0.016413684	0.121640081	0.920479566	1.030417486	0.702078703	1.169958468	0.335540854	0.500426315	0.366102529	0.116892557	0.765024675	0.089752615	2.05028853	0.071665481	0.258693546	0.188175958	1.013160324	0.687435738	0.204650708	1.400336376	0.402794735	0.313260529	0.144626171	0.269427443	0.124571036	0.343941332	0.609928358	0.357687108	0.223290604	0.312891792	0.531803532
E07000093	2013	0.520057024	0.652955396	0.68407454	0.361613121	0.203476167	0.205778425	0.695866366	1.452610379	0.325575665	0.410184991	0.241539985	0.354485083	0.425260478	0.892117036	0.838695161	0.278157075	0.95425632	0.018664481	0.136314235	1.005507446	1.063970415	0.79624909	1.262647469	0.380550875	0.579088816	0.418173895	0.13510444	0.906764175	0.07930793	2.3582987	0.075918832	0.282299775	0.222174268	1.132104391	0.730907287	0.216310405	1.765321025	0.479175654	0.328394119	0.112113353	0.309977315	0.132579296	0.38453709	0.701303659	0.374067415	0.240834701	0.341183932	0.568152271
E07000094	2013	0.524172478	0.658919397	0.683942086	0.361803042	0.207632782	0.205487377	0.703929218	1.348036555	0.319202821	0.409293332	0.234699285	0.35260007	0.439837578	0.863424316	0.829981257	0.272368599	0.95254753	0.019672008	0.136897388	0.987335357	1.054499802	0.780888993	1.245567616	0.369415619	0.572230112	0.407759532	0.13781151	0.897607126	0.081160878	2.322388674	0.076336236	0.280732522	0.217176733	1.120750286	0.709765242	0.21465976	1.807452941	0.464643186	0.328352384	0.113075941	0.296394054	0.129254187	0.390967434	0.709403605	0.371510781	0.24121984	0.349588917	0.561536212
E07000095	2013	0.491833273	0.622451928	0.649941223	0.346061848	0.196745865	0.187130792	0.672049279	1.377145788	0.304616915	0.390635122	0.220515031	0.319662643	0.406644216	0.883807154	0.780956099	0.25893315	0.889314369	0.018031255	0.134617839	0.947175978	1.029929668	0.732752654	1.190633718	0.348125945	0.536679715	0.390783215	0.125561479	0.831483605	0.081375103	2.182203367	0.07267997	0.270751401	0.201171626	1.066425816	0.690810327	0.208706877	1.608543264	0.428942259	0.317616273	0.13594297	0.282069803	0.123373115	0.368157469	0.651614388	0.362426533	0.229309668	0.322875768	0.545092048
E07000096	2013	0.497807053	0.633049257	0.656941854	0.349787719	0.201668906	0.18892297	0.678608586	1.36007404	0.306775228	0.389597473	0.217915119	0.328770149	0.422445527	0.859582292	0.793484372	0.262541561	0.905868981	0.018960678	0.132094346	0.951425935	1.023357941	0.740631494	1.19331994	0.345463495	0.540851616	0.393973196	0.129318354	0.855022346	0.07952484	2.216236006	0.074401032	0.274364204	0.201352855	1.078809424	0.692533248	0.206938196	1.66504469	0.44032993	0.313042914	0.125907842	0.278501399	0.120371416	0.367672475	0.651839023	0.365305053	0.23123595	0.327454257	0.549499676
E07000098	2013	0.482420475	0.611512358	0.636967143	0.342008783	0.193424649	0.187401865	0.658160163	1.362931183	0.304557967	0.386798121	0.218839591	0.31775776	0.403608069	0.844256524	0.777357034	0.257282641	0.880103902	0.018070759	0.124600651	0.94397937	1.024046354	0.731987094	1.18664219	0.347266802	0.527938536	0.386363584	0.122168174	0.822775225	0.080086856	2.171395175	0.074506003	0.266478836	0.199388039	1.04113244	0.689926734	0.205613236	1.570675055	0.432207297	0.310139402	0.122147663	0.280508903	0.123755889	0.356150584	0.640853611	0.357428861	0.229087523	0.321630614	0.53602299
E07000099	2013	0.495704688	0.63089647	0.652210516	0.343443192	0.202078802	0.192080157	0.677032566	1.375980444	0.304942729	0.394114115	0.222743336	0.330473903	0.418264911	0.849742992	0.788716296	0.260255049	0.902411619	0.019021204	0.130145179	0.955256757	1.02874863	0.748500144	1.208369381	0.35453517	0.537395881	0.392891916	0.126405086	0.84744088	0.082617169	2.223776806	0.073344464	0.271657046	0.204404922	1.064365987	0.690850606	0.208557931	1.647595183	0.440706724	0.319383268	0.121049692	0.283592626	0.125814797	0.367741331	0.672588058	0.363319612	0.231659502	0.33415119	0.542821375
E07000102	2013	0.493150386	0.623367312	0.644398693	0.34084844	0.197276402	0.191263196	0.672914543	1.397477625	0.311822878	0.395058704	0.225918053	0.330139912	0.415277588	0.862370337	0.786274068	0.260917447	0.895347311	0.01893216	0.128442855	0.966244597	1.041211888	0.750938791	1.218602048	0.359494683	0.53746439	0.391932373	0.124001266	0.83983856	0.085065791	2.22883233	0.073847966	0.270461152	0.205300722	1.061042509	0.701922631	0.209394135	1.605007107	0.439018441	0.320067696	0.125506872	0.288373627	0.129146373	0.367500671	0.659442467	0.365320973	0.230467027	0.333309464	0.542873353
E07000103	2013	0.447927086	0.599152644	0.613770858	0.317086708	0.198771311	0.168764852	0.656739052	1.258972845	0.269822621	0.349221975	0.190692894	0.278686493	0.420136254	0.826313266	0.732908584	0.235859904	0.78787599	0.015695027	0.130583582	0.866035652	0.970464441	0.652648445	1.091234115	0.303183102	0.482673257	0.334857788	0.119398039	0.707792892	0.094880781	1.859324385	0.069571889	0.258006737	0.17959804	0.992741774	0.621073873	0.202947842	1.371932122	0.354840643	0.30800466	0.162251685	0.236478371	0.113484296	0.364250944	0.611258515	0.334987161	0.229254021	0.32622689	0.503120163
E07000105	2013	0.49102645	0.619350482	0.653942728	0.349705428	0.197435819	0.193270062	0.669114975	1.451379434	0.311185352	0.395650738	0.226623156	0.330964305	0.408011458	0.873452805	0.796439569	0.264462878	0.89889595	0.01790227	0.129582285	0.961660322	1.036844191	0.753499756	1.211949273	0.362708032	0.542522404	0.399074729	0.125030625	0.845052645	0.081135336	2.217513461	0.072494983	0.271684817	0.207490624	1.074828251	0.702436542	0.211546404	1.603659436	0.448085603	0.318738156	0.125750221	0.289354022	0.126994983	0.369489396	0.656410447	0.359748784	0.232814762	0.323338331	0.543348067
E07000106	2013	0.488337181	0.617084274	0.643944082	0.347367101	0.191945875	0.194600571	0.658762046	1.548067805	0.314639501	0.401868175	0.232900802	0.340140882	0.399748183	0.878775613	0.803485168	0.264429485	0.90443603	0.018724219	0.125340604	0.972230141	1.028449821	0.768024567	1.225928586	0.375238864	0.550341244	0.395330104	0.12032939	0.850984266	0.081746131	2.304526673	0.069879924	0.265972047	0.213147712	1.054031878	0.701473241	0.210082963	1.59567015	0.455066253	0.324630106	0.110732583	0.301327334	0.133577346	0.367699974	0.701812122	0.364678395	0.227916805	0.326714042	0.530973083
E07000107	2013	0.469921052	0.61858644	0.636397872	0.340553278	0.194452394	0.179455507	0.656044523	1.433093028	0.298426664	0.379390675	0.208880975	0.312024008	0.407750697	0.877503904	0.779642844	0.257209702	0.868299383	0.017640426	0.122891481	0.920341309	1.01983328	0.714224543	1.165821209	0.335025715	0.518466793	0.380949748	0.123498845	0.797926566	0.082541654	2.114187865	0.072956572	0.264933586	0.19182637	1.039616574	0.688628352	0.203831157	1.542205218	0.423049667	0.310297212	0.135538976	0.269095098	0.118331677	0.343843211	0.634615305	0.364359523	0.226210174	0.311921699	0.538962406
E07000108	2013	0.521025312	0.648814834	0.678754273	0.364319567	0.199273624	0.206895031	0.683757003	1.52430311	0.325509758	0.414283235	0.24059507	0.357899729	0.419934859	0.882800854	0.828094929	0.278415522	0.968586752	0.019551365	0.133269332	1.003203717	1.047194757	0.80251926	1.263623914	0.384722019	0.584194854	0.422069706	0.131075828	0.922300168	0.073548029	2.433848135	0.072892092	0.27723719	0.223878816	1.121137379	0.72264298	0.214678811	1.7920966	0.49175466	0.327197288	0.103148636	0.308537979	0.133400276	0.380128835	0.724999133	0.374521711	0.235678414	0.341068207	0.554746707
E07000109	2013	0.467705535	0.603003542	0.626838086	0.340300191	0.187162956	0.183829881	0.644393498	1.487365681	0.302475359	0.381472869	0.219894242	0.315392165	0.393271177	0.869346007	0.763340204	0.254377486	0.857779881	0.017788241	0.12292038	0.936960994	1.017207237	0.728501148	1.181308168	0.349762301	0.520628518	0.380914237	0.116735685	0.807976294	0.081043361	2.159985738	0.070466847	0.260139523	0.198340603	1.025421436	0.688452202	0.205523416	1.511153897	0.429506959	0.310813325	0.132084722	0.279014596	0.124430011	0.353781415	0.639767538	0.352545397	0.222004711	0.313424756	0.527260842
E07000110	2013	0.499455489	0.633019694	0.66074549	0.352961271	0.195377896	0.19591942	0.667451285	1.476438961	0.318319448	0.400763734	0.23151426	0.338274619	0.407812631	0.880061869	0.806139625	0.267009354	0.927400697	0.018553038	0.130583046	0.978850113	1.043870106	0.767799751	1.232503545	0.367584082	0.554250159	0.40936332	0.127315593	0.874839671	0.075948984	2.310412652	0.076429741	0.271899267	0.210093693	1.093703641	0.719524991	0.209375221	1.677876455	0.466718898	0.317484197	0.114028424	0.296028082	0.12893111	0.364165078	0.677824957	0.373866612	0.22900239	0.324510001	0.551595756
E07000111	2013	0.523063791	0.646967895	0.673023372	0.362754315	0.201396277	0.204290251	0.690754352	1.476896345	0.328476627	0.418780174	0.24158131	0.357108273	0.419748278	0.885363056	0.83469253	0.276980038	0.965774766	0.020216238	0.132350943	1.016122688	1.070580142	0.804281745	1.278395123	0.384738482	0.575248387	0.422462961	0.131805845	0.906168841	0.077019345	2.417571331	0.076485403	0.280169087	0.218794304	1.115704274	0.737039067	0.214684631	1.76269457	0.484917069	0.327202735	0.115370316	0.30982055	0.133517835	0.372956271	0.704327755	0.385509824	0.237192943	0.337779817	0.563286425
E07000112	2013	0.512071736	0.637139545	0.674459848	0.356420064	0.202322757	0.205295674	0.687673961	1.515212506	0.316103142	0.405107297	0.237050229	0.350416582	0.422179862	0.868445972	0.808950948	0.27160793	0.932972286	0.019033286	0.13234059	0.986367063	1.033106892	0.789917877	1.241387844	0.380004272	0.572877436	0.404767935	0.128632444	0.887863219	0.080112378	2.337189547	0.069926043	0.275283606	0.221753071	1.099964931	0.700296274	0.217075348	1.716756281	0.471498891	0.329891958	0.110104737	0.302412151	0.132587306	0.393298756	0.711731056	0.359466805	0.239832848	0.340652997	0.545624403
E07000113	2013	0.494801971	0.626503039	0.651538282	0.356051494	0.191964534	0.193726323	0.657794239	1.528944554	0.322073408	0.404922466	0.230928417	0.342991224	0.403583573	0.88281315	0.809397526	0.271684928	0.934600473	0.018323839	0.127362481	0.980151549	1.037776481	0.774374543	1.237264653	0.370929731	0.548124038	0.414075707	0.124676132	0.874184653	0.072179416	2.338438026	0.07308078	0.269541594	0.208824264	1.081128016	0.719712481	0.207849101	1.6846551	0.470948737	0.316330181	0.112507283	0.29421535	0.128655969	0.349607923	0.678282744	0.373071447	0.225063201	0.322534191	0.544332417
E07000114	2013	0.494784274	0.606339281	0.650576423	0.360636059	0.186946371	0.200662344	0.651299777	1.671764592	0.327528108	0.414675336	0.246567335	0.348284134	0.388119767	0.888778787	0.80581528	0.27316115	0.923032217	0.018108488	0.128017621	1.014304594	1.047408999	0.80240922	1.266435206	0.400548845	0.568326895	0.410292889	0.1164747	0.889365638	0.074564265	2.440476694	0.069513783	0.265288105	0.221866105	1.059149369	0.730527455	0.214904645	1.593761744	0.481630107	0.323868109	0.105872532	0.317166643	0.14228762	0.369102559	0.710007189	0.370501674	0.226348482	0.324104821	0.528799522
E07000115	2013	0.508265615	0.639757374	0.663699768	0.350432643	0.201165185	0.19789978	0.684826898	1.391334021	0.320349349	0.408526136	0.230565811	0.34376255	0.418828121	0.866229429	0.815468836	0.270251518	0.937606954	0.019475729	0.130641308	0.985670165	1.053828085	0.7730707	1.240895618	0.367797195	0.553189372	0.412670856	0.130960857	0.877325707	0.078384753	2.300451126	0.073960986	0.277278295	0.209033565	1.097187496	0.718925322	0.210798558	1.723459513	0.463016664	0.320490077	0.115142792	0.295205205	0.127821215	0.367127845	0.675113892	0.375232308	0.234554332	0.334014946	0.559832346
E07000116	2013	0.513693766	0.644473923	0.667160619	0.349973673	0.207474324	0.195588964	0.695148438	1.383187054	0.314285681	0.399776653	0.224100531	0.339220329	0.43331229	0.872758416	0.808713447	0.267171842	0.929251252	0.019415606	0.135062896	0.970630689	1.040270872	0.760088988	1.224651288	0.356467445	0.55110287	0.403036756	0.133627714	0.870775778	0.083913219	2.261178631	0.075460679	0.279894873	0.20620644	1.104971817	0.701602512	0.210652213	1.714001364	0.444426487	0.32439631	0.127366159	0.285090635	0.126100492	0.380606464	0.672907324	0.377086996	0.234538387	0.339260557	0.556628423
E07000117	2013	0.438752419	0.573539231	0.603278318	0.324913777	0.175913257	0.180168829	0.61825531	1.626089798	0.294070639	0.37348005	0.219441627	0.313242761	0.375072751	0.855654994	0.742524337	0.246317252	0.827907867	0.016236585	0.114915712	0.914978439	0.991497943	0.721057012	1.164595616	0.356285777	0.507906581	0.370354169	0.107860856	0.789688416	0.082658151	2.14652187	0.065943782	0.249218509	0.196254734	0.994489689	0.678759357	0.201600666	1.395693939	0.427823753	0.309125205	0.120627046	0.282615933	0.12929255	0.347230184	0.616966312	0.345180166	0.214003873	0.301879865	0.504493001
E07000118	2013	0.484598403	0.618835024	0.647455671	0.348731227	0.186926712	0.194132169	0.646689533	1.553043463	0.317539368	0.393537188	0.229981001	0.339239839	0.398944687	0.872271418	0.811345763	0.265920216	0.919940418	0.017717534	0.12242598	0.964976417	1.024561579	0.765990408	1.22318621	0.366256781	0.541379232	0.408485179	0.123526662	0.86579708	0.071770249	2.304274904	0.074113557	0.26545011	0.208602112	1.076393415	0.721788287	0.204604988	1.66694171	0.476861595	0.309874713	0.101196049	0.294134477	0.127400518	0.338825977	0.665730615	0.371255815	0.222323913	0.313823261	0.541408178
E07000119	2013	0.523948903	0.640185191	0.677640954	0.359588587	0.200892379	0.213642961	0.689963467	1.502187414	0.322250132	0.415493007	0.247663933	0.371016674	0.416921249	0.849462458	0.825946151	0.276448917	0.960042304	0.020687353	0.126095069	1.016689951	1.045699957	0.821126699	1.279999814	0.399204151	0.592732215	0.417557388	0.129842016	0.931322501	0.073424989	2.477227232	0.071640709	0.275895734	0.229693938	1.092793736	0.715617189	0.216388122	1.820373345	0.500101581	0.331121484	0.086820521	0.322509559	0.137455659	0.385302137	0.749116186	0.368104859	0.240504608	0.343287269	0.541471092
E07000120	2013	0.434003535	0.566375426	0.598897301	0.318975157	0.174410954	0.178623785	0.617666689	1.578501806	0.289612911	0.365793575	0.21692592	0.298966031	0.375481185	0.844260682	0.726090478	0.241313847	0.807551076	0.015371106	0.122595454	0.904376508	0.977922411	0.700653735	1.143387406	0.34905461	0.502376032	0.358868262	0.106736378	0.767391048	0.084045773	2.075151428	0.065690091	0.248078454	0.195312869	0.9851663	0.660363091	0.201530217	1.340708965	0.405318191	0.304953709	0.122220581	0.277602345	0.128549175	0.356592939	0.611636416	0.331676142	0.213672783	0.299861517	0.495617585
E07000121	2013	0.480475841	0.612998804	0.639884214	0.344788032	0.189610757	0.19155552	0.652186643	1.581948779	0.309225613	0.397154949	0.230444443	0.337119399	0.398026345	0.877877282	0.792382607	0.261670961	0.89866941	0.018102296	0.123051592	0.970751135	1.02399459	0.764586791	1.219308054	0.372875109	0.545240093	0.395988883	0.118783189	0.860879679	0.078730778	2.31287143	0.070191705	0.264562561	0.210509227	1.041470944	0.706483993	0.208312082	1.598572315	0.457175128	0.319681997	0.110515638	0.299918708	0.131611306	0.35914421	0.683453287	0.3662681	0.224130088	0.319738069	0.524701936
E07000122	2013	0.432544845	0.558312736	0.592066514	0.318458979	0.173114049	0.177970231	0.614877578	1.570565879	0.28992945	0.36902333	0.216858615	0.299282452	0.370141782	0.832007642	0.720828818	0.238938939	0.799659612	0.015422335	0.117141478	0.897079645	0.975767287	0.700037405	1.141459325	0.350826232	0.496184857	0.353278176	0.104986941	0.752584965	0.087658575	2.057786357	0.065450419	0.243782766	0.194835719	0.968657369	0.655477062	0.202001738	1.311309325	0.39959219	0.307706154	0.129735348	0.279447963	0.130398422	0.356719683	0.601491405	0.32790578	0.213187778	0.301499941	0.48966998
E07000123	2013	0.40356783	0.53850999	0.576592886	0.300635717	0.17703971	0.168445109	0.607100991	1.425827494	0.268267184	0.334446829	0.192836569	0.268193321	0.372419179	0.805414061	0.691638889	0.227805317	0.731814771	0.014080609	0.115055931	0.85630528	0.942750007	0.645793397	1.072965382	0.318204676	0.467615325	0.320948197	0.098926192	0.681941018	0.095400675	1.828153758	0.059253264	0.237191233	0.182078578	0.932061095	0.620587407	0.198736708	1.192661506	0.357665893	0.298335448	0.136137958	0.248313709	0.118878048	0.34841691	0.562486381	0.306594785	0.216374217	0.298495665	0.463945428
E07000124	2013	0.514633309	0.635663441	0.66957949	0.352975629	0.196247019	0.206171465	0.681363878	1.506416423	0.330805881	0.418986017	0.246365255	0.363292769	0.410514506	0.864731691	0.823005336	0.278810629	0.963818575	0.018630002	0.133492043	1.010504251	1.056559597	0.808124444	1.280538518	0.395199201	0.576743567	0.424149734	0.131648957	0.92448755	0.075044467	2.442342954	0.073711528	0.275728687	0.221748893	1.111214469	0.731935315	0.213275008	1.774855478	0.490467489	0.326006281	0.094248303	0.316709207	0.13664328	0.382258556	0.721683121	0.37589027	0.235136168	0.331726267	0.554408499
E07000125	2013	0.460326249	0.595196746	0.616396127	0.338248178	0.175570313	0.185048177	0.624467268	1.640441583	0.31311946	0.390403696	0.226188621	0.337645699	0.384075553	0.867685613	0.782572197	0.258476348	0.888046707	0.01754746	0.115939623	0.953309315	1.009327852	0.75533203	1.214716136	0.365823195	0.522280001	0.399983088	0.113970174	0.841293645	0.07119392	2.288553542	0.071247401	0.253874855	0.199595031	1.032561698	0.714644724	0.199264879	1.551007588	0.465346474	0.304231616	0.104533724	0.289977542	0.129533345	0.325033195	0.639199295	0.369718553	0.21152746	0.301597084	0.523440705
E07000126	2013	0.486486957	0.615173135	0.645222458	0.34922502	0.190040871	0.194093854	0.652721131	1.599309921	0.317369164	0.401903319	0.235014369	0.340329792	0.397423056	0.881287323	0.801424852	0.266539479	0.909666488	0.017808888	0.127579275	0.983166886	1.040122611	0.772760528	1.239823037	0.37768998	0.547550856	0.403537283	0.121792984	0.862230829	0.077798958	2.314287234	0.072012366	0.264952339	0.211722424	1.063442627	0.720416884	0.209070299	1.608058572	0.464794453	0.318675422	0.111997893	0.301424829	0.133677074	0.359419822	0.680950246	0.36929766	0.224020741	0.321843644	0.536811236
E07000127	2013	0.496032392	0.623435891	0.652387976	0.347237844	0.192488115	0.198208981	0.659208834	1.506004422	0.317858113	0.40272938	0.235686469	0.350970156	0.401731372	0.871506469	0.812537752	0.270031763	0.933692448	0.018473501	0.124994293	0.97823608	1.03292193	0.780977567	1.240806614	0.37893811	0.556141737	0.411351081	0.127300985	0.884651424	0.073665568	2.354689503	0.070848963	0.268405889	0.213204992	1.080772584	0.721288485	0.207806834	1.711965311	0.479575713	0.31658047	0.100259492	0.303542811	0.130605573	0.356831795	0.69884958	0.373830331	0.227303417	0.321474615	0.540297605
E07000128	2013	0.517709511	0.622969494	0.674230437	0.364530131	0.198669155	0.213028643	0.680982816	1.58015235	0.323737101	0.418407413	0.251440413	0.363891302	0.406074286	0.870742278	0.827279043	0.275960847	0.953033856	0.019051816	0.130759025	1.026857297	1.051381686	0.826462128	1.28390663	0.407213308	0.594334794	0.421089258	0.126505764	0.928370112	0.074194908	2.476199435	0.070328425	0.272608013	0.232027627	1.093274659	0.728138762	0.220030299	1.745049401	0.50256998	0.329357039	0.094735218	0.327019526	0.139284949	0.390888001	0.743307492	0.365648204	0.238351167	0.336779863	0.541206512
E07000129	2013	0.495245128	0.629206858	0.661369411	0.348767153	0.2043499	0.197033531	0.682792545	1.410094177	0.303204791	0.391257054	0.227271331	0.336804864	0.417897718	0.868285064	0.795964381	0.265480086	0.896010641	0.018745701	0.12581487	0.964869851	1.04554519	0.759622534	1.217772018	0.363556338	0.552571662	0.394665705	0.128428759	0.843398168	0.084360521	2.205650709	0.070114365	0.273552228	0.210441234	1.072017468	0.701662539	0.214909044	1.643369404	0.453115985	0.324483487	0.123938875	0.292345387	0.127310629	0.374468416	0.675819119	0.358493413	0.241024737	0.331529742	0.545348354
E07000130	2013	0.466238302	0.604858458	0.633215876	0.335349879	0.190072281	0.187324059	0.647384936	1.504721785	0.299083796	0.381956615	0.222133307	0.321765016	0.396691739	0.868341827	0.775495893	0.254872167	0.86334572	0.017281822	0.121862858	0.942221504	1.018602825	0.737505834	1.188399812	0.355874886	0.528633029	0.381926414	0.118490726	0.818520395	0.084685119	2.170395007	0.069932342	0.260788656	0.203719959	1.030181546	0.691330428	0.206621914	1.524159071	0.436798113	0.316120264	0.120049897	0.286319079	0.127450301	0.357855656	0.661653961	0.355508999	0.226744351	0.316931632	0.524191446
E07000131	2013	0.508426271	0.633492534	0.6620393	0.350147091	0.195508189	0.202581028	0.675082826	1.474337623	0.324236496	0.411353893	0.24104996	0.355717899	0.408459412	0.865756338	0.820677782	0.272923202	0.940782607	0.01895298	0.126697535	1.000837542	1.060368143	0.795626609	1.264670124	0.384181848	0.563766052	0.418060296	0.129644809	0.892306783	0.077135209	2.36086526	0.073630527	0.27301362	0.218137966	1.087470187	0.730761336	0.211391139	1.730501797	0.480663798	0.322701503	0.100691435	0.311313281	0.134051287	0.365088204	0.696854602	0.374200972	0.235151612	0.330609966	0.553569627
E07000132	2013	0.494122274	0.623159144	0.656870074	0.348309139	0.192150479	0.20056719	0.663640793	1.599170271	0.320148602	0.407155289	0.24188408	0.352070929	0.402369501	0.871811135	0.809849524	0.269334022	0.927292581	0.017897556	0.127544467	0.990389661	1.043949472	0.792955547	1.256956918	0.389007151	0.557838284	0.412137821	0.124293352	0.884009958	0.07777213	2.363982808	0.073961853	0.267111732	0.217760508	1.082153467	0.723316667	0.211007954	1.657051135	0.477473579	0.324199494	0.10354792	0.311548937	0.13767733	0.369064326	0.701283256	0.372009464	0.229483021	0.327107222	0.538543538
E07000133	2013	0.507542241	0.638871843	0.668352244	0.359293583	0.191903855	0.202879159	0.670784129	1.55888988	0.32521587	0.407089221	0.241187301	0.351676246	0.412832021	0.869119777	0.815530154	0.2709526	0.94786721	0.018750609	0.137581825	1.006909883	1.048812352	0.798138549	1.25968304	0.384122247	0.573544739	0.416557247	0.128826124	0.928875175	0.073387609	2.40633521	0.074425906	0.272453948	0.218324959	1.11528533	0.73015072	0.211275184	1.738462192	0.484195555	0.318932701	0.099905449	0.308751244	0.134126467	0.375566523	0.71131509	0.371037293	0.229351291	0.332184823	0.549693117
E07000134	2013	0.490331091	0.619121546	0.647625319	0.347180289	0.187060876	0.197128669	0.648444731	1.552484204	0.320017023	0.401900288	0.235203011	0.349721516	0.397253865	0.859777185	0.809054661	0.267755283	0.928224565	0.01831366	0.120908491	0.975908413	1.030464274	0.782947692	1.243439668	0.377538948	0.5467315	0.413237415	0.122693241	0.872261601	0.071135835	2.350004268	0.072960124	0.264704081	0.21094152	1.071720251	0.723495468	0.205569811	1.675802083	0.481685568	0.312516071	0.098622948	0.30124692	0.132052698	0.342638825	0.685458758	0.375230101	0.223098221	0.314475004	0.539904348
E07000135	2013	0.462203156	0.589506108	0.647861783	0.323293254	0.211028206	0.193823635	0.695998202	1.281021973	0.278197357	0.35902551	0.215970953	0.291632776	0.420057198	0.843128382	0.732112095	0.246572202	0.780891664	0.016013905	0.132489869	0.939833577	1.034040354	0.711495685	1.157594583	0.345550218	0.548719516	0.343435901	0.114586727	0.734541961	0.111462947	1.905975196	0.058015939	0.261821272	0.209553638	1.017025524	0.647490971	0.223719553	1.330622337	0.377576212	0.338107991	0.148090249	0.276641357	0.130952556	0.403922043	0.625845135	0.311545153	0.254595093	0.347417383	0.512221381
E07000136	2013	0.477125498	0.596576781	0.640010249	0.349143497	0.18219364	0.195096005	0.639233548	1.60020872	0.311398154	0.39187881	0.231970543	0.33352094	0.388596281	0.867002055	0.793868851	0.263436072	0.894293295	0.017298922	0.119888106	0.965818738	1.012531054	0.769626226	1.216412911	0.376223134	0.546876249	0.399181598	0.118266628	0.860997372	0.071928025	2.30060034	0.070715629	0.260873573	0.21151038	1.045941146	0.713411073	0.208429932	1.563092078	0.471084518	0.311420732	0.111589178	0.299636657	0.130976976	0.349428449	0.66850421	0.360609582	0.220996085	0.308275564	0.521011672
E07000137	2013	0.512794037	0.621883825	0.67820717	0.36301886	0.198352443	0.221770625	0.683399135	1.610491101	0.321552299	0.415060586	0.260318087	0.373891159	0.405401518	0.854806331	0.825403273	0.276828863	0.94275197	0.019784514	0.118263687	1.024198516	1.054807283	0.84522503	1.298935125	0.423891709	0.593623858	0.422514147	0.124452358	0.927245562	0.078543815	2.475476897	0.06625824	0.269593704	0.239843342	1.086169694	0.728224633	0.222275015	1.742471026	0.520733235	0.337435815	0.089911934	0.334665438	0.146243395	0.391703197	0.761778666	0.360811572	0.243678227	0.3386635	0.530062367
E07000138	2013	0.440009621	0.590139198	0.609119637	0.330247753	0.176402544	0.173491918	0.609935896	1.620679466	0.293666543	0.369058428	0.211042843	0.305319596	0.381170943	0.884358631	0.758116986	0.245576009	0.841418847	0.016055249	0.119702415	0.908341392	0.98159841	0.704788879	1.149400824	0.338489787	0.503752752	0.370390079	0.110332849	0.808109297	0.076656169	2.170366258	0.070616467	0.250830097	0.190861273	0.992660768	0.684602085	0.197058338	1.437078226	0.423314424	0.299406921	0.115299275	0.27337304	0.122481164	0.326017255	0.646711992	0.360602675	0.207587434	0.299315143	0.505619822
E07000139	2013	0.507306462	0.633796124	0.670880446	0.360109337	0.197065981	0.206391592	0.676993701	1.569414002	0.324653806	0.411340611	0.24518158	0.36173513	0.411732409	0.881236983	0.832621383	0.274896248	0.952284719	0.019247105	0.122981512	1.011989872	1.059113836	0.811829824	1.279641173	0.392898956	0.573547387	0.427323914	0.126699732	0.912570798	0.073117852	2.433259791	0.073918665	0.275371851	0.222021373	1.115063427	0.742125374	0.215442964	1.74676502	0.508276115	0.325651165	0.097758543	0.31326865	0.134602687	0.36616333	0.70950094	0.380487607	0.235655873	0.323597571	0.551731723
E07000140	2013	0.503985673	0.620726288	0.668348053	0.360690215	0.195871175	0.206195108	0.673524364	1.641168427	0.322984804	0.416757445	0.248937097	0.363000293	0.400720877	0.880067972	0.829344533	0.277390531	0.946491306	0.018269231	0.123374444	1.006167747	1.049446536	0.816703979	1.275575496	0.403993097	0.57615154	0.419376775	0.125229893	0.900053235	0.075505859	2.436940638	0.071218809	0.270053839	0.226795687	1.089018079	0.731849959	0.216345035	1.683935257	0.498836925	0.328453881	0.104535872	0.322081025	0.138092846	0.373333775	0.723374315	0.374073183	0.232224814	0.323685866	0.540425422
E07000141	2013	0.504465761	0.635630988	0.669142813	0.354174381	0.197880622	0.203885062	0.679623371	1.495876698	0.317857506	0.404419651	0.237971675	0.353107814	0.417921435	0.871846749	0.818433892	0.271181225	0.935105234	0.019208809	0.12548024	0.991421714	1.048476545	0.791996025	1.254069439	0.38198289	0.5635159	0.413509717	0.127882489	0.888258507	0.078306151	2.343233883	0.073300919	0.271841914	0.217732408	1.096910414	0.722623768	0.213569429	1.714457532	0.480524423	0.326181184	0.105586367	0.306071564	0.133034525	0.370092366	0.695903866	0.371755771	0.23495708	0.331321787	0.548134707
E07000142	2013	0.509137674	0.638638119	0.671078915	0.359798049	0.195577641	0.209369667	0.679277982	1.589231684	0.325697505	0.416138024	0.250360652	0.367173401	0.41027184	0.888768787	0.82812378	0.278099457	0.960442795	0.019322225	0.128614476	1.02368747	1.063429791	0.822658351	1.292944756	0.403698667	0.582119131	0.428112757	0.129208991	0.931788949	0.075627053	2.463225102	0.07140108	0.27324374	0.226290145	1.114174962	0.742344043	0.215384239	1.762660171	0.504654455	0.3294021	0.095392794	0.32509704	0.139898258	0.373434049	0.738996716	0.38016933	0.236124507	0.33437079	0.546875402
E07000143	2013	0.485984681	0.60577939	0.64490941	0.354817436	0.185739918	0.20284461	0.651689073	1.606708259	0.315612029	0.39915644	0.243174167	0.346951234	0.391637168	0.866502612	0.79935595	0.264034395	0.902932075	0.018593854	0.119138618	0.99076136	1.038160169	0.796647952	1.245519067	0.391003523	0.560617982	0.404133085	0.118387465	0.875098704	0.076497462	2.3436556	0.068714201	0.261240281	0.221986964	1.053913571	0.718886955	0.211675925	1.598896954	0.483167935	0.31984904	0.10512369	0.312388281	0.138381328	0.362479017	0.705456915	0.359992243	0.228204825	0.321262321	0.523532631
E07000144	2013	0.525399993	0.646672426	0.683527735	0.365508535	0.20165733	0.214131944	0.688528502	1.519683083	0.327470205	0.417851163	0.248258663	0.369171731	0.419930485	0.871088554	0.83845338	0.277740868	0.968151425	0.020420572	0.129167262	1.026572781	1.062390197	0.827311781	1.290223424	0.399935658	0.591592274	0.427476783	0.13250879	0.93484753	0.075170241	2.452185529	0.072830084	0.276762684	0.231630405	1.12196745	0.736628775	0.217480081	1.796387415	0.508222399	0.330112717	0.095994799	0.3208181	0.137734475	0.380921149	0.732247115	0.372821812	0.240444344	0.342805007	0.554750995
E07000145	2013	0.488732183	0.606266867	0.646484699	0.354944233	0.184739931	0.200521065	0.644530985	1.576004736	0.31439501	0.392731602	0.23534197	0.340964372	0.396690666	0.857315007	0.792870464	0.263201073	0.907148721	0.01834043	0.125313311	0.977575163	1.012091017	0.779899149	1.224645046	0.379035919	0.558988857	0.400135815	0.120856999	0.874952122	0.072388996	2.323940619	0.069177681	0.261254013	0.218707328	1.057409376	0.705504326	0.208712868	1.634299203	0.47429005	0.313566163	0.09665024	0.300476643	0.132470371	0.363150171	0.694419449	0.353831729	0.224440266	0.319922539	0.522567594
E07000146	2013	0.500019258	0.611864723	0.658270506	0.357944143	0.190902361	0.208305864	0.663750681	1.589485491	0.318408597	0.408776335	0.247211288	0.357482098	0.396517708	0.860675943	0.814249765	0.270458479	0.928626857	0.018822484	0.121295745	1.001308552	1.038092275	0.811447108	1.26192855	0.400502451	0.572604437	0.412498139	0.122119805	0.90118724	0.07344735	2.409457843	0.069295561	0.26421664	0.225688251	1.06791064	0.720945735	0.214547812	1.684314449	0.495856225	0.323218939	0.097687086	0.319456188	0.138019073	0.371758253	0.726040452	0.363477253	0.230815515	0.326123547	0.529740935
E07000147	2013	0.548574194	0.641502933	0.702263368	0.374263801	0.209001678	0.231316564	0.708447528	1.513359444	0.328309177	0.428070795	0.263861404	0.382959214	0.424065391	0.834875284	0.84195467	0.28041867	0.985602283	0.020967937	0.132158598	1.053040747	1.056573231	0.865917261	1.309598395	0.42567357	0.628048911	0.424131097	0.133217186	0.975908041	0.074523482	2.531903437	0.069551357	0.277849046	0.249095259	1.125586021	0.717776185	0.228357186	1.873457905	0.523420775	0.344687015	0.085901896	0.338401168	0.145829437	0.42206482	0.788921518	0.353198789	0.251394827	0.356994015	0.541222272
E07000148	2013	0.432477487	0.582202687	0.598916863	0.322751321	0.175011301	0.169041576	0.599462086	1.60178035	0.287595104	0.359864432	0.203357979	0.298110668	0.380777988	0.850934274	0.745665901	0.237981472	0.819058821	0.016436568	0.117774811	0.878479997	0.95207072	0.685286786	1.119740695	0.328465164	0.488281019	0.355350939	0.106278734	0.778457513	0.078771667	2.106131485	0.071989092	0.242987044	0.186390874	0.961966635	0.661237698	0.192897957	1.386836441	0.404404703	0.295932425	0.110778291	0.262514993	0.120102578	0.324610967	0.633190765	0.354313358	0.202988903	0.296578067	0.494900214
E07000149	2013	0.524648652	0.642609351	0.678911809	0.36322135	0.201108122	0.210564635	0.689424293	1.470726843	0.325367759	0.415905986	0.243484005	0.361660993	0.420284684	0.856289717	0.830082046	0.275517747	0.96322259	0.019982334	0.130371732	1.010355147	1.051262813	0.812881484	1.270264339	0.392258709	0.582335014	0.421590283	0.131635408	0.920167122	0.075032169	2.409744476	0.074101165	0.275761977	0.225515585	1.116558484	0.720612736	0.216000706	1.791042657	0.494159032	0.328730491	0.102272786	0.313371255	0.134765228	0.383197443	0.719958487	0.370137558	0.238926063	0.340228954	0.55341751
E07000150	2013	0.442430893	0.584007322	0.603850004	0.333707014	0.170392516	0.176422866	0.602474386	1.589877894	0.301364963	0.373549346	0.214000772	0.312399381	0.374593036	0.867383293	0.75907104	0.248921455	0.855401132	0.016352968	0.113547271	0.914559722	0.99169775	0.718765861	1.164173864	0.343058722	0.502224748	0.384969533	0.110348901	0.81043681	0.068920502	2.19178668	0.070869246	0.248773565	0.187647556	0.998033666	0.704148334	0.193740866	1.476949235	0.445994474	0.290595911	0.111514856	0.274357453	0.120480002	0.308173286	0.627399699	0.362484128	0.205202679	0.291999928	0.513797308
E07000151	2013	0.51035802	0.646444457	0.669144959	0.351067872	0.197843845	0.201493307	0.689274294	1.456156764	0.322638789	0.408246072	0.23643	0.360896854	0.424638346	0.869640919	0.832146541	0.273925746	0.965264409	0.020071497	0.129130484	0.991572197	1.050637337	0.792965328	1.258753526	0.376425492	0.561417548	0.421694879	0.134378314	0.895994637	0.074729738	2.368009705	0.076385341	0.277760295	0.212511667	1.124797879	0.727960885	0.20944195	1.813036264	0.487559462	0.323779695	0.105452387	0.300113005	0.129084217	0.370123487	0.690671604	0.382902075	0.233951834	0.331016978	0.560202296
E07000152	2013	0.501998587	0.636172736	0.661629581	0.349912967	0.19617985	0.196962492	0.669644136	1.477603225	0.319097605	0.405290832	0.233801198	0.344073559	0.410821444	0.870104763	0.809537964	0.269880173	0.935132084	0.018241659	0.132868267	0.975657615	1.038172958	0.774214057	1.235834827	0.371391636	0.554230245	0.412786223	0.130618846	0.875101431	0.077159722	2.303613025	0.072771594	0.271715324	0.212710323	1.095804722	0.715168087	0.209351286	1.719688668	0.464415835	0.318627649	0.111161927	0.298221047	0.12899725	0.367293205	0.687620336	0.370870131	0.231023526	0.329397091	0.548892457
E07000153	2013	0.478988108	0.615530757	0.639944241	0.344743786	0.187772285	0.188005737	0.64574353	1.494843498	0.309690797	0.388085845	0.21982991	0.330089155	0.401037663	0.857004734	0.79197856	0.261512673	0.904610334	0.018148599	0.123073935	0.943357588	1.010562355	0.744339532	1.194062897	0.353848922	0.530101269	0.399096095	0.122035387	0.84663957	0.073239367	2.243450732	0.072592522	0.262308023	0.201585653	1.058450114	0.703176569	0.202374902	1.626767064	0.456415388	0.306516712	0.112449854	0.283490416	0.122657295	0.338736873	0.649199772	0.36481028	0.220480413	0.312168327	0.537091767
E07000154	2013	0.437580505	0.57989312	0.599738677	0.321048305	0.176317576	0.169859501	0.61393794	1.482662013	0.285639603	0.361031434	0.206846618	0.291660625	0.37420231	0.846831543	0.725821357	0.239018763	0.809118293	0.015600698	0.121076632	0.881224118	0.972893531	0.679227441	1.120201477	0.325660212	0.489701903	0.360169708	0.109485463	0.767904775	0.080602724	2.027697424	0.071585538	0.247450175	0.18421271	0.982550521	0.655340829	0.196481377	1.378124456	0.397252819	0.300020324	0.133786779	0.266208559	0.119482442	0.338773787	0.602986804	0.338741035	0.209490948	0.295536632	0.510531452
E07000155	2013	0.543386636	0.681659814	0.694692348	0.367492074	0.2074709	0.203955415	0.706316348	1.367816976	0.33922726	0.421111214	0.233330743	0.362184261	0.444056295	0.895644682	0.857803494	0.283452976	1.006626249	0.020418647	0.140363349	1.020670149	1.066038073	0.798106242	1.265406253	0.369536899	0.584721875	0.434100407	0.140752835	0.931035735	0.073568048	2.38759911	0.081018068	0.286822672	0.218881569	1.193794698	0.740036463	0.212337076	1.892665078	0.486668058	0.323495453	0.105870179	0.296327564	0.124086425	0.369694614	0.68230413	0.384885675	0.239125651	0.345677648	0.589301157
E07000156	2013	0.453514153	0.588201659	0.626898472	0.329201969	0.187774121	0.186929518	0.645946308	1.504031815	0.291398699	0.368614402	0.219510106	0.310353907	0.395849434	0.828880359	0.746686748	0.24949576	0.830574762	0.016733943	0.121496057	0.921678342	0.993175344	0.724248254	1.159253777	0.35284223	0.516004464	0.368722339	0.113904952	0.783694891	0.084065992	2.079684601	0.067549491	0.253765539	0.199677795	1.010958382	0.667105606	0.207450746	1.440197985	0.424702749	0.314428776	0.118687204	0.275948043	0.126041774	0.365320089	0.629525223	0.335190965	0.226772159	0.309405925	0.516598531
E07000163	2013	0.525738394	0.635347785	0.681369443	0.362811408	0.196838498	0.213896523	0.675652075	1.533652075	0.332355925	0.415760003	0.250954154	0.360528524	0.41030682	0.846858583	0.823212585	0.27775837	0.963260273	0.019168446	0.138306504	1.028413503	1.04253602	0.821070989	1.276954064	0.401280132	0.596754611	0.421438157	0.130633357	0.944294322	0.071969658	2.476057573	0.070832098	0.272923072	0.233244741	1.12227944	0.724465408	0.2156238	1.777321866	0.499523736	0.324858902	0.084880034	0.324507227	0.140196463	0.395913395	0.743591622	0.360896592	0.236348578	0.343063181	0.546244411
E07000164	2013	0.511660762	0.624626111	0.667479294	0.353364405	0.195142771	0.209471007	0.674667449	1.485936252	0.322267785	0.406200958	0.245122508	0.354020075	0.407531018	0.845026317	0.814044537	0.271439924	0.938392136	0.018865324	0.133773724	1.003726199	1.033117637	0.805980862	1.259775243	0.391473063	0.576941747	0.412859939	0.128452351	0.91386625	0.074933681	2.386662518	0.071121151	0.269587349	0.225319208	1.104920249	0.714873349	0.213380987	1.741016075	0.486735433	0.323275753	0.092025189	0.318292255	0.135902077	0.385322444	0.710534948	0.357383841	0.234317485	0.333134536	0.542080115
E07000165	2013	0.503623665	0.62755991	0.661381664	0.351362807	0.197036395	0.199976281	0.672143575	1.485651489	0.316789949	0.403013312	0.234914111	0.34526861	0.41056121	0.861822685	0.809373624	0.267343125	0.926628621	0.018937558	0.12947116	0.990804437	1.039427714	0.782528429	1.23997313	0.376168194	0.562753977	0.408313813	0.126535827	0.891262806	0.076423434	2.338088564	0.073386014	0.272223722	0.216044646	1.084270722	0.71499919	0.211822638	1.701720773	0.472281884	0.32019426	0.105782138	0.302724198	0.13066826	0.373649932	0.685100654	0.36697798	0.232524993	0.330092361	0.544748825
E07000166	2013	0.486223856	0.61053078	0.643517818	0.341401304	0.188446805	0.194905024	0.657171193	1.507300347	0.309877675	0.393461797	0.229245863	0.344831723	0.402670289	0.84061416	0.79071043	0.261034231	0.900198381	0.018334723	0.125775576	0.959083269	1.000400598	0.762306953	1.208594908	0.36397823	0.545564286	0.397087008	0.12646827	0.862599389	0.074552627	2.25257653	0.069193474	0.261985171	0.209135644	1.06005647	0.689800204	0.206095953	1.666053241	0.455899678	0.311094647	0.104904494	0.29400297	0.126531088	0.369175511	0.6746039	0.347219537	0.226671338	0.324351302	0.531239486
E07000167	2013	0.517626634	0.635392425	0.681524689	0.364216038	0.198515216	0.215160224	0.681132789	1.520929827	0.323179792	0.409599583	0.249029536	0.367540072	0.415138114	0.841267132	0.831217271	0.276490411	0.955276084	0.019711288	0.125729319	1.015725807	1.038183184	0.823898026	1.265354069	0.398414099	0.590177841	0.423539439	0.126993403	0.928479068	0.072699683	2.439698679	0.070103375	0.272588214	0.23275686	1.106898864	0.726825458	0.217526226	1.791718483	0.516230521	0.324332575	0.084564165	0.318861991	0.134437325	0.378959693	0.726099403	0.359043517	0.238629103	0.336028734	0.547527604
E07000168	2013	0.496233512	0.603923493	0.657735279	0.350558765	0.189866853	0.20732328	0.654712822	1.579571095	0.315262311	0.400097082	0.247230842	0.35288233	0.392519363	0.837892242	0.800294377	0.269352655	0.915903208	0.017939091	0.12576169	0.989115866	1.011328712	0.800180266	1.241230981	0.395999457	0.572006811	0.401822071	0.120740914	0.901480803	0.074004282	2.394223044	0.068399584	0.262545987	0.227902465	1.053326871	0.702308406	0.212458469	1.669117391	0.485305387	0.321098768	0.086385326	0.318666177	0.138944809	0.38067484	0.728781917	0.349406833	0.23069386	0.326736713	0.52043464
E07000169	2013	0.497501521	0.630675815	0.653877288	0.348347502	0.192166162	0.196293339	0.65949173	1.457996831	0.313877555	0.397802921	0.231265986	0.34388026	0.407316215	0.852337471	0.801475429	0.265780232	0.929281209	0.018379099	0.1291761	0.969518543	1.023352792	0.77073561	1.226733613	0.367589757	0.549620185	0.407299796	0.128791468	0.878947622	0.07289892	2.302160693	0.072954875	0.267550236	0.211089617	1.087408197	0.7067947	0.204450474	1.71560277	0.465777255	0.314068813	0.103961353	0.295942542	0.128048316	0.358412753	0.685897724	0.364123409	0.225842278	0.326234005	0.540512071
E07000170	2013	0.466221868	0.601844926	0.632797265	0.345103632	0.178866591	0.188779845	0.633909023	1.710554897	0.31638995	0.394939532	0.23211841	0.33948828	0.385304562	0.891894039	0.803433883	0.265179917	0.90283446	0.017053229	0.119265091	0.970007388	1.030169346	0.774400162	1.234741138	0.376999102	0.533675706	0.409227429	0.115447742	0.863617564	0.071674111	2.352444273	0.071350254	0.259770772	0.205931268	1.049336889	0.736571733	0.204702072	1.559534746	0.479672844	0.308537627	0.10483181	0.301322524	0.131100089	0.332116313	0.662601681	0.376559036	0.214853364	0.302584583	0.531993439
E07000171	2013	0.49099113	0.621079251	0.656285506	0.351879573	0.1891452	0.200266176	0.660336279	1.617261071	0.319977507	0.404882916	0.240551592	0.352075754	0.401148728	0.877244402	0.814523219	0.270386053	0.928870736	0.018324414	0.12133262	0.993337095	1.043137408	0.795310629	1.259051201	0.388352775	0.557973738	0.413375336	0.122268758	0.887391481	0.074142553	2.379301091	0.070943266	0.266654533	0.217014887	1.074759185	0.731336445	0.210921045	1.672893069	0.489547448	0.320114025	0.101740515	0.309237175	0.134368075	0.354309449	0.695316846	0.372357929	0.227625828	0.319595285	0.538439796
E07000172	2013	0.478941803	0.618577257	0.645057201	0.339183298	0.195732764	0.197537795	0.662561477	1.490363628	0.302148444	0.390290406	0.228218002	0.34430518	0.408902224	0.848394888	0.789235295	0.258829752	0.891584265	0.018403031	0.117588135	0.952562702	1.024717197	0.764354593	1.220602979	0.36850898	0.537490184	0.392916848	0.121348095	0.845388887	0.08029566	2.246150841	0.070187283	0.260581707	0.206773971	1.04049711	0.69840319	0.209321656	1.619150552	0.463922178	0.321115664	0.104089904	0.294072545	0.129832213	0.355111059	0.686585573	0.361388806	0.230474431	0.32115265	0.531614169
E07000173	2013	0.481377871	0.619589775	0.652090832	0.341988275	0.19287507	0.196215278	0.667286193	1.509779513	0.305127589	0.391596798	0.232779505	0.335755433	0.403108067	0.871860449	0.789473044	0.259942431	0.887447383	0.017901242	0.122183965	0.963334405	1.041051166	0.763306172	1.220599451	0.368832609	0.548596884	0.396043891	0.121190793	0.855160766	0.082099326	2.255088025	0.072150224	0.26774268	0.210683948	1.054389115	0.703954997	0.212725888	1.588666662	0.45958817	0.323698607	0.11641887	0.302229085	0.131994137	0.370776559	0.674511516	0.358462683	0.232556923	0.32270024	0.537379151
E07000174	2013	0.462336577	0.596078277	0.622104879	0.347695326	0.173400657	0.187381254	0.621238054	1.780329965	0.322383252	0.400405884	0.236920989	0.341631531	0.374124484	0.903191175	0.799915651	0.264809829	0.895557237	0.016927366	0.116863488	0.98409421	1.035599415	0.783055871	1.24798325	0.385923763	0.537868786	0.406952322	0.111740895	0.85518905	0.072757068	2.376712932	0.070986446	0.254481578	0.209471649	1.029676496	0.744081101	0.203999611	1.485422526	0.475297674	0.309716534	0.105013821	0.308639258	0.137705648	0.327627322	0.674514892	0.37959096	0.212261428	0.308121849	0.521987031
E07000175	2013	0.488388614	0.618538209	0.650643594	0.346932845	0.189945543	0.200226556	0.655919396	1.527657923	0.315986112	0.396475054	0.238117003	0.349395165	0.397096537	0.859632166	0.804642073	0.267225841	0.911618427	0.018280478	0.121415732	0.98112636	1.02951396	0.786097528	1.240399477	0.378039181	0.553314722	0.407530922	0.120266162	0.879881791	0.074105873	2.332043385	0.072784054	0.265216029	0.215564772	1.071557466	0.71988671	0.209087246	1.659721021	0.484105961	0.315603385	0.09754432	0.305435958	0.132024914	0.355247761	0.67868172	0.361030029	0.226024417	0.317579464	0.542124456
E07000176	2013	0.509952085	0.638960069	0.664349823	0.348708003	0.202450476	0.199293055	0.687120715	1.398392755	0.31623239	0.403330212	0.231166631	0.345409829	0.418337202	0.863254019	0.809279924	0.267886185	0.9327444	0.019827421	0.128971236	0.979916634	1.051859272	0.77608696	1.235846241	0.368868346	0.556378968	0.411330681	0.130335728	0.884221201	0.080679043	2.304472183	0.074495446	0.274947678	0.211090403	1.090180972	0.711811909	0.212146509	1.72736651	0.467217015	0.324935664	0.113712292	0.297488872	0.128618461	0.372639388	0.681615451	0.372318377	0.236480336	0.332355874	0.557246122
E07000177	2013	0.50146841	0.633309463	0.659850081	0.354842227	0.199641295	0.191792889	0.676977231	1.485973649	0.314531799	0.400322536	0.224666972	0.335190723	0.419038219	0.89210818	0.810762661	0.266928201	0.914131241	0.017738445	0.133379176	0.971264686	1.046759671	0.757428785	1.225070107	0.361005415	0.543461982	0.401936604	0.12855677	0.857662829	0.083154109	2.240566484	0.075106061	0.273254445	0.206177856	1.084991543	0.715778986	0.211807155	1.626747015	0.445777067	0.320343463	0.136029274	0.290624459	0.127283073	0.369206907	0.664280307	0.373000296	0.230571357	0.330074267	0.555316342
E07000178	2013	0.4332262	0.592330119	0.603901896	0.320594315	0.19040925	0.16293661	0.617069203	1.479918927	0.279066116	0.355983708	0.191712524	0.281952773	0.391013705	0.863011909	0.742263862	0.238418085	0.794843475	0.015422469	0.122757735	0.867992622	0.969047216	0.657576584	1.100503621	0.307599753	0.474071115	0.345227445	0.10873352	0.738923732	0.090194396	1.970197668	0.074159185	0.248125685	0.179499699	0.965738131	0.650759221	0.196155917	1.331307761	0.37582427	0.302096105	0.140493508	0.246915754	0.11572877	0.336618332	0.612529029	0.349777023	0.213320986	0.301272718	0.500515984
E07000179	2013	0.530716666	0.662845186	0.686010284	0.367714895	0.205882049	0.205290684	0.703985132	1.400871264	0.323766093	0.414863754	0.236433842	0.357578391	0.438000364	0.885166987	0.844894252	0.275680925	0.967732068	0.019989418	0.136055202	1.006208338	1.068568805	0.792891124	1.267239355	0.374480361	0.576111491	0.42004554	0.138054221	0.915720685	0.078520842	2.369032396	0.077360326	0.282369038	0.216842756	1.132891459	0.730296779	0.214746983	1.811190969	0.475956755	0.327247353	0.115102132	0.302271639	0.130005741	0.37924428	0.70050179	0.384334956	0.238445473	0.343979941	0.573740923
E07000180	2013	0.52167241	0.660725984	0.685929776	0.362595534	0.208793948	0.200788016	0.703237459	1.363237027	0.313364724	0.406186775	0.230431456	0.349454702	0.433810968	0.886448315	0.82428676	0.271476828	0.942323568	0.01988233	0.134495037	0.984059164	1.061256848	0.773951523	1.239407924	0.364444391	0.567689558	0.411554749	0.136539092	0.894330807	0.08028674	2.290873227	0.075914134	0.280974936	0.21420776	1.11483867	0.71090332	0.216689115	1.781604193	0.466592388	0.328974989	0.126405506	0.295370296	0.126530884	0.384660252	0.691129613	0.372791655	0.241897951	0.341388763	0.568554743
E07000181	2013	0.529275927	0.660262933	0.686866183	0.368756872	0.206348182	0.20303727	0.701423196	1.479640037	0.325855273	0.419613426	0.238780906	0.35519653	0.429710699	0.902293582	0.841803632	0.278971948	0.972843568	0.019672105	0.139618196	1.01391084	1.071091355	0.797305022	1.273277327	0.380527277	0.580025224	0.423055929	0.135461677	0.92009526	0.078923256	2.405246851	0.077303287	0.28529576	0.219970755	1.135008959	0.735697336	0.21662874	1.797973092	0.477913757	0.329170793	0.118218816	0.307214449	0.131852594	0.387169681	0.708441861	0.386409699	0.240148863	0.344740371	0.571656259
E07000187	2013	0.522512555	0.652385076	0.686666727	0.368176777	0.199759742	0.210369587	0.694267697	1.587962203	0.332002637	0.422327889	0.248606021	0.363564712	0.426221083	0.905149907	0.842607664	0.278475907	0.965685402	0.019551116	0.136889763	1.039174352	1.080171341	0.820895692	1.300647222	0.39942985	0.588835327	0.425285867	0.131487752	0.93442091	0.079646728	2.457661354	0.074542765	0.278541987	0.22762548	1.126892141	0.746937089	0.220566091	1.766409844	0.494425113	0.334674485	0.108700052	0.319558009	0.140348859	0.388770605	0.725161557	0.381553326	0.240124609	0.345330319	0.562484114
E07000188	2013	0.515735589	0.641115193	0.679531566	0.368018447	0.198302565	0.209113194	0.682717352	1.562974851	0.330728489	0.414648613	0.245085026	0.363066482	0.416082064	0.894017968	0.841204004	0.279774643	0.960760443	0.019525177	0.132886356	1.021794502	1.058965312	0.817517852	1.284154917	0.393817229	0.581869213	0.426573712	0.129530686	0.929838902	0.074806202	2.44743295	0.072923493	0.276348602	0.226110773	1.122474295	0.739354261	0.21726561	1.775645942	0.499057307	0.327854344	0.101907125	0.317586488	0.135593074	0.378009396	0.726167799	0.374900936	0.236156874	0.336008544	0.554711496
E07000189	2013	0.524881903	0.643327851	0.685827925	0.370587721	0.199249038	0.213045677	0.687395894	1.559840546	0.330700519	0.420320622	0.248939407	0.366312845	0.420086265	0.883404972	0.84271778	0.280304004	0.971399624	0.019216825	0.132164432	1.028228209	1.062855576	0.824790817	1.290750418	0.400219423	0.594402015	0.425643677	0.131298871	0.935680807	0.074321813	2.467628865	0.073281528	0.276207022	0.230183234	1.12490381	0.737283445	0.219632324	1.784285586	0.502402431	0.331158428	0.100614055	0.320654322	0.138259524	0.38574684	0.732275153	0.37354023	0.238643325	0.33892006	0.554750687
E07000190	2013	0.516367644	0.639312167	0.680870683	0.369526547	0.202974622	0.206852435	0.68813629	1.576383145	0.327745722	0.414695606	0.244025821	0.354946403	0.419532386	0.895101021	0.842794449	0.280241174	0.956031456	0.019364362	0.126969111	1.018517273	1.073122213	0.812850342	1.281025911	0.390593299	0.580281851	0.420996879	0.128858285	0.913179353	0.076947763	2.426015355	0.074023442	0.281894716	0.222565308	1.112634993	0.743119125	0.219775475	1.729391767	0.499406829	0.329612974	0.110409831	0.312999408	0.134105159	0.375113198	0.702263842	0.378173992	0.238966926	0.330013879	0.562656501
E07000191	2013	0.58100291	0.669785101	0.73291739	0.387383063	0.216765014	0.240110847	0.732187581	1.534685081	0.344917724	0.448964875	0.276063964	0.395669876	0.436857067	0.845163608	0.859468055	0.293648014	1.028336591	0.02151017	0.146681459	1.091825412	1.090661097	0.897909224	1.355512178	0.446142844	0.660221522	0.43536567	0.143083941	1.016185753	0.076101835	2.649687914	0.069939933	0.287643069	0.264794166	1.167095619	0.72797493	0.237291828	1.964426685	0.534554455	0.356469019	0.085736313	0.352169896	0.154439421	0.459791501	0.831478494	0.356747626	0.260214533	0.382906459	0.561494608
E07000192	2013	0.467309743	0.601733062	0.628507726	0.34276171	0.177986448	0.186794949	0.624023515	1.625850226	0.316848276	0.39265008	0.228998813	0.33483067	0.383701493	0.872028534	0.788837978	0.2603256	0.897370269	0.016921656	0.121571862	0.960933998	1.020379107	0.761710278	1.219957749	0.368873775	0.531026278	0.399958573	0.117701487	0.855947965	0.069725409	2.305531498	0.072477733	0.255923574	0.20550592	1.037207508	0.723616274	0.199564985	1.568157996	0.466292073	0.302768902	0.09955252	0.295329726	0.129822722	0.328939195	0.666513971	0.372309194	0.212711692	0.304366343	0.525567365
E07000193	2013	0.463679938	0.59827108	0.62470313	0.338140927	0.183980666	0.187214434	0.636500791	1.475618232	0.297723592	0.376330294	0.218629482	0.321053669	0.39617456	0.842689707	0.769219468	0.251427081	0.858231171	0.016967207	0.12094561	0.928774351	0.996035977	0.729493657	1.176373544	0.350653608	0.524420543	0.378239502	0.11764229	0.820352069	0.076341297	2.152048166	0.069867148	0.254926896	0.200615416	1.021316489	0.681888505	0.201698786	1.537792593	0.435179006	0.305877014	0.114178316	0.280447677	0.124209402	0.347080189	0.643143188	0.346304668	0.219691097	0.309357226	0.51594766
E07000194	2013	0.511622557	0.644413478	0.67241165	0.350611233	0.20052469	0.204526031	0.690792223	1.410568512	0.313201604	0.406375372	0.234553121	0.350500909	0.423511572	0.857634145	0.816631807	0.268910216	0.943704892	0.020648737	0.133314361	0.984347009	1.038601973	0.786294593	1.241438567	0.377523843	0.565578677	0.40810445	0.13308879	0.887817366	0.07805658	2.335153699	0.073030126	0.272152425	0.217065243	1.103046601	0.708003712	0.211139709	1.778619503	0.472268005	0.325072274	0.103286538	0.300140111	0.129600607	0.37955111	0.711734495	0.365314831	0.2393333	0.341751688	0.547570783
E07000195	2013	0.482351081	0.612722404	0.64369484	0.347797988	0.186798194	0.194124979	0.647980425	1.59109274	0.314016742	0.3944059	0.23277008	0.34012051	0.395188428	0.881974548	0.802852657	0.265120101	0.905477368	0.017439015	0.126754123	0.97640918	1.023891223	0.769967161	1.224600402	0.373554797	0.54858915	0.403012089	0.121443825	0.869168786	0.075336057	2.315239673	0.070525993	0.263833748	0.213803349	1.063388346	0.71515607	0.207814535	1.624387208	0.466729145	0.314700381	0.10415809	0.302119105	0.131909595	0.353813149	0.68643346	0.365211707	0.224053015	0.318187439	0.532011272
E07000196	2013	0.5088301	0.637358598	0.672253942	0.349388898	0.198840934	0.208341346	0.681728351	1.461216454	0.317376744	0.403709328	0.241144839	0.359574424	0.416192903	0.844857352	0.817907386	0.270341438	0.945995709	0.019130649	0.130518362	0.993527444	1.038963041	0.801937294	1.25766645	0.38547206	0.572910358	0.417269512	0.131805517	0.914678803	0.075141222	2.366698812	0.071052477	0.272110531	0.223818727	1.100854309	0.715919252	0.211889426	1.79610341	0.487987968	0.323444321	0.087682567	0.311082724	0.13349246	0.380620836	0.72515783	0.362049426	0.237491964	0.336291722	0.542582704
E07000197	2013	0.503814709	0.640295236	0.663616659	0.352599215	0.198623883	0.199801192	0.675962568	1.454395233	0.311779425	0.399613542	0.230648516	0.348443262	0.416422114	0.868016618	0.810412773	0.267302848	0.93257755	0.019176804	0.129063196	0.977430995	1.0346301	0.778514676	1.2305672	0.368318711	0.56128494	0.409858327	0.130380831	0.892303802	0.075009867	2.324674148	0.073236803	0.27466515	0.215586141	1.087344627	0.707143624	0.210463272	1.753446641	0.475713002	0.321166281	0.105257911	0.297180906	0.12777816	0.36893686	0.696188255	0.366869594	0.234001586	0.332474845	0.545634889
E07000198	2013	0.509945673	0.634843603	0.66807433	0.354104163	0.194920062	0.208908988	0.671757076	1.516540681	0.320249113	0.408392343	0.243996843	0.36232531	0.411545264	0.851812743	0.819507391	0.270709524	0.951850071	0.019233859	0.126666074	0.999217491	1.040250185	0.809056547	1.263856177	0.391416518	0.576621989	0.419001297	0.130263492	0.918551151	0.072371802	2.409243421	0.071116084	0.270210523	0.225242291	1.093930724	0.721405698	0.211660273	1.782073911	0.498994815	0.322804583	0.090451049	0.313882072	0.135628351	0.369402351	0.724551908	0.366434796	0.234668504	0.332766558	0.539735981
E07000199	2013	0.467381061	0.608435382	0.623747931	0.341364203	0.177661871	0.184876808	0.628102308	1.566343327	0.312432694	0.390729723	0.226531149	0.328095522	0.385609678	0.875657045	0.78286842	0.257780169	0.898739744	0.016921158	0.126483677	0.954974015	1.017840554	0.746131284	1.205256424	0.361740299	0.528358143	0.399016304	0.120898936	0.854258357	0.070962138	2.26774327	0.073949086	0.259120426	0.201254332	1.054342034	0.710755197	0.197702391	1.575786167	0.452651435	0.302722974	0.108760991	0.289908595	0.129134476	0.3376454	0.651610785	0.371304666	0.21184529	0.30741383	0.525214244
E07000200	2013	0.514635328	0.634069936	0.672065893	0.356025556	0.196254509	0.212403855	0.681058892	1.515362436	0.324636061	0.416921652	0.247085102	0.364947734	0.413720685	0.850685677	0.818562552	0.274110065	0.951843082	0.019733566	0.127577171	1.012609646	1.049736752	0.816938085	1.279627147	0.39870647	0.579085993	0.41916624	0.128140222	0.912428209	0.0763615	2.413024287	0.071082146	0.270464047	0.227402434	1.103161649	0.721127823	0.215035313	1.756085641	0.495531103	0.329279297	0.094916816	0.318469368	0.139168437	0.380816703	0.723580648	0.366143281	0.237275967	0.339986825	0.544475342
E07000201	2013	0.453411815	0.593334082	0.617094964	0.336166877	0.181508376	0.183649743	0.627201268	1.494304323	0.286006672	0.375012279	0.218005272	0.305914248	0.388644381	0.843359033	0.741189117	0.242302664	0.827469686	0.016402105	0.122081069	0.908180484	0.992210628	0.705941592	1.152077541	0.342245988	0.519848645	0.364755272	0.112925785	0.788460882	0.081228135	2.082229611	0.071254268	0.247297323	0.197273612	1.007943414	0.657456827	0.203695887	1.428869357	0.410032736	0.310708272	0.130129398	0.277145485	0.126468802	0.363222716	0.632598029	0.33267265	0.215251728	0.31318354	0.512110456
E07000202	2013	0.440330275	0.580643145	0.604986235	0.332365413	0.177094703	0.175853427	0.616458942	1.535167688	0.291745731	0.367131218	0.211344862	0.300115125	0.378863447	0.866100163	0.742118629	0.245335071	0.82171043	0.01615467	0.11916012	0.90715784	0.990136518	0.701950479	1.149279711	0.339432275	0.502650037	0.366426037	0.108628361	0.78303301	0.080791951	2.100977921	0.070254587	0.250507791	0.191605467	0.991862845	0.676514413	0.199504201	1.374686896	0.41455494	0.302179727	0.131770034	0.272864875	0.122967158	0.338283483	0.618259942	0.347833835	0.211769301	0.300349953	0.507560263
E07000203	2013	0.521591172	0.642463215	0.677271198	0.362055586	0.197808506	0.208184957	0.682724658	1.482235737	0.326196906	0.41462727	0.245158455	0.357276038	0.415558601	0.869914646	0.830088486	0.275963849	0.961406034	0.018966636	0.136460006	1.012712001	1.05238991	0.807611314	1.267515124	0.389635213	0.582854672	0.42057081	0.134938531	0.916334104	0.074999613	2.398743727	0.072739399	0.27532299	0.226191859	1.122269861	0.723906687	0.215215579	1.793922983	0.488264565	0.325782963	0.101287089	0.314859907	0.134251431	0.386554511	0.721507625	0.368120151	0.236802281	0.342608022	0.554418996
E07000204	2013	0.491326681	0.616059686	0.648298157	0.354733561	0.193127307	0.196634594	0.657679023	1.515646195	0.311845007	0.391597512	0.230479331	0.34035984	0.404804936	0.863578047	0.805443441	0.263636085	0.908001743	0.018405098	0.121205128	0.97085568	1.024025829	0.770153297	1.222788419	0.368133055	0.550481338	0.403451173	0.123029701	0.866282101	0.07407082	2.282419744	0.073360391	0.266469647	0.210782469	1.069262583	0.710817882	0.208963607	1.651752947	0.471498359	0.3151983	0.110041842	0.29416673	0.12713197	0.355903398	0.673571518	0.363624428	0.228333969	0.316187823	0.537461954
E07000205	2013	0.531732688	0.644703714	0.687505906	0.359159588	0.208571402	0.214773999	0.70232116	1.392400397	0.323119217	0.415058101	0.246071541	0.368243132	0.42209486	0.853676916	0.824731825	0.280080221	0.956766504	0.020398985	0.130339503	1.012233161	1.056958369	0.814862447	1.267083733	0.392291255	0.590147857	0.421821871	0.13447597	0.920993325	0.078054825	2.397166269	0.07177942	0.280243407	0.23174077	1.117654488	0.711469484	0.22083207	1.818064367	0.492073776	0.333785187	0.103332115	0.318735351	0.135140324	0.397977266	0.727293894	0.357774987	0.246757532	0.347481579	0.552600273
E07000206	2013	0.502863274	0.606962102	0.655080088	0.359000332	0.190909728	0.208091263	0.658357942	1.599290124	0.322364606	0.412233863	0.249839348	0.356143648	0.390991356	0.862800913	0.810819835	0.271958722	0.926456876	0.018610053	0.122333836	1.008730565	1.038166755	0.81481059	1.267785404	0.405141572	0.576673432	0.409944901	0.11928281	0.891121101	0.074459396	2.427441752	0.067123961	0.264323627	0.227981746	1.060178869	0.720113373	0.215586926	1.648632994	0.492083806	0.325427185	0.099510015	0.322357552	0.141492127	0.372279409	0.73002572	0.36175435	0.231173942	0.327057388	0.525475154
E07000207	2013	0.52492483	0.650888975	0.680713386	0.360953787	0.209898284	0.198799039	0.701195635	1.278328765	0.31950931	0.407668804	0.226545493	0.345978715	0.438310571	0.850836994	0.822910116	0.270152161	0.939483283	0.020582073	0.134712018	0.981271958	1.053960935	0.762994725	1.23141144	0.356942726	0.550828122	0.408630245	0.134573437	0.881451643	0.080153983	2.286929935	0.076235966	0.280199523	0.202985944	1.110189674	0.707094736	0.208645765	1.758827568	0.447327227	0.321875918	0.133494883	0.284376445	0.126048213	0.371439912	0.657427355	0.382019087	0.233760303	0.342125787	0.576665779
E07000208	2013	0.504356065	0.638316948	0.662516268	0.344158688	0.209410229	0.195565714	0.696967393	1.328117874	0.304041382	0.396596739	0.223046206	0.331529515	0.427927158	0.854207643	0.796217339	0.261835111	0.901640795	0.019790337	0.130816934	0.962073147	1.050105686	0.75324083	1.214910865	0.354875329	0.544374438	0.389802985	0.131552145	0.837210964	0.089683401	2.184205369	0.073195402	0.276558865	0.206602613	1.070658718	0.690459738	0.214290429	1.65281749	0.434734678	0.327566251	0.130576082	0.284076427	0.126165702	0.383964381	0.674298018	0.362767546	0.243208963	0.342954694	0.551763762
E07000209	2013	0.50867145	0.644877211	0.665305013	0.346827393	0.204371556	0.191882143	0.687347538	1.382205481	0.30935118	0.400647879	0.224808078	0.336058652	0.422707719	0.877029886	0.79827728	0.264102395	0.924422425	0.018859852	0.136231231	0.958153371	1.039045884	0.749109746	1.217074115	0.35348485	0.548067971	0.402214024	0.132379537	0.875385936	0.084471282	2.257213879	0.075756403	0.277820623	0.20509937	1.085845278	0.697578421	0.208786758	1.695527252	0.439239501	0.322776188	0.126929908	0.287053388	0.126594575	0.377664708	0.68422295	0.378412701	0.230609998	0.33498075	0.555575191
E07000210	2013	0.540313281	0.665389104	0.691892438	0.36584022	0.215654956	0.211379224	0.723172788	1.415172015	0.3262679	0.419202513	0.242464219	0.364634363	0.44573461	0.885191963	0.838465811	0.278488167	0.97258803	0.021000077	0.134059464	1.025998201	1.08531334	0.814109849	1.281353419	0.385732184	0.588962925	0.423174274	0.137945053	0.931749979	0.08377843	2.415733882	0.075185723	0.288888435	0.22342399	1.139099032	0.730850172	0.222331354	1.837896119	0.48998928	0.339220121	0.118736003	0.30855393	0.133628155	0.398843953	0.719639015	0.383740634	0.248931132	0.35674378	0.573135613
E07000211	2013	0.529831567	0.660266083	0.683482101	0.358027436	0.218377514	0.196728899	0.712433899	1.276654617	0.314911167	0.405236625	0.221352202	0.344588214	0.445867916	0.869508112	0.819428905	0.268254328	0.948230355	0.020734922	0.137763427	0.973770047	1.047146901	0.756835304	1.21779896	0.349732735	0.55422232	0.406149212	0.138754313	0.877932295	0.083854065	2.255069157	0.076527204	0.283731944	0.205344508	1.124095168	0.694872961	0.211173126	1.77799102	0.445160427	0.32640155	0.133959636	0.277877842	0.122490197	0.382855165	0.681995558	0.377921593	0.242094878	0.34966549	0.567623586
E07000212	2013	0.49862159	0.639277615	0.663830913	0.345440443	0.208521636	0.191596646	0.694706029	1.415469439	0.301023156	0.391313868	0.219937494	0.327678637	0.428639104	0.875827602	0.797671441	0.261052862	0.892362774	0.018126986	0.134416661	0.951274352	1.037836877	0.74568041	1.202883584	0.351681741	0.545694715	0.383939762	0.128731503	0.833601659	0.091015516	2.178888585	0.07129076	0.276656598	0.207785516	1.071628261	0.686596079	0.214901314	1.613651497	0.429898655	0.329095754	0.136440382	0.282851839	0.126500336	0.384981196	0.68341312	0.360358504	0.238947391	0.337913629	0.547794132
E07000213	2013	0.505975826	0.65137158	0.670367973	0.349965813	0.207781554	0.194406043	0.709526198	1.359113089	0.299415691	0.394757305	0.222497205	0.334429221	0.439899749	0.867274024	0.800046235	0.261190843	0.913485351	0.019382008	0.133691248	0.95589387	1.046274347	0.751914531	1.205739383	0.351736958	0.557990869	0.389585996	0.13563327	0.847223446	0.087570764	2.207619222	0.074292814	0.281150573	0.207803796	1.08132441	0.688436259	0.214903962	1.70265423	0.439398505	0.326614984	0.133090939	0.282204982	0.124005754	0.388649695	0.695506233	0.368202746	0.246871452	0.34693153	0.553411892
E07000214	2013	0.512119533	0.647128285	0.671355897	0.34745621	0.209454359	0.198687468	0.703384555	1.380875042	0.313878505	0.406684308	0.230250432	0.344081007	0.431783045	0.885163931	0.810631657	0.270239077	0.924186313	0.019622201	0.131809576	0.987465801	1.070690563	0.77035111	1.248562292	0.366050898	0.55156506	0.405642771	0.133446533	0.851831446	0.091645734	2.247322552	0.074208057	0.279113061	0.210563218	1.096870564	0.713128871	0.215445645	1.68233956	0.445578232	0.33443166	0.133841761	0.294755606	0.130635581	0.381695686	0.682585205	0.373875462	0.241617571	0.347523579	0.561363652
E07000215	2013	0.539784177	0.679486695	0.697516563	0.372101829	0.211298559	0.207000952	0.712605139	1.35337939	0.328745607	0.421611264	0.237494922	0.353111369	0.446347839	0.894226588	0.847702922	0.277889427	0.981174696	0.020003166	0.147563078	1.021812374	1.077418184	0.793945871	1.271210542	0.373062858	0.588570759	0.42097902	0.139182097	0.923404067	0.079425735	2.37565534	0.078223659	0.28787542	0.221753603	1.171061476	0.725231173	0.217195691	1.84322834	0.467332436	0.331332495	0.115603719	0.30111995	0.131827118	0.400079246	0.703671782	0.377266445	0.243295829	0.363704498	0.575122243
E07000216	2013	0.52742131	0.644782898	0.680513072	0.353603147	0.210057453	0.206527105	0.707032571	1.399402339	0.321802096	0.415140827	0.239016859	0.35150932	0.430051772	0.868234304	0.820294828	0.27382814	0.947209674	0.01970216	0.13217866	1.008572773	1.073290011	0.795619593	1.266120563	0.381037467	0.575394416	0.413150786	0.132766338	0.894022129	0.085528873	2.347398088	0.073718925	0.282640023	0.218741289	1.107182218	0.722127745	0.219161018	1.746204681	0.470388083	0.33478522	0.121589216	0.308244744	0.132852159	0.391660207	0.698541918	0.377197434	0.244723575	0.34870865	0.564727212
E07000217	2013	0.499834266	0.635232508	0.651707212	0.347048187	0.20609778	0.186903583	0.685242818	1.367883878	0.303466857	0.392129885	0.213559123	0.324908299	0.429277336	0.873830711	0.792686785	0.260832588	0.896640432	0.018658019	0.128011866	0.945994161	1.042662684	0.7346522	1.198765554	0.342300287	0.529715564	0.388845098	0.128401134	0.818917312	0.088781061	2.160866561	0.07585435	0.275254794	0.198511895	1.068537019	0.693861067	0.210413277	1.598834725	0.426570316	0.322859336	0.150104938	0.27406086	0.122571283	0.364900458	0.641091132	0.374480323	0.232896054	0.334139178	0.554838369
E07000218	2013	0.493539807	0.620951988	0.653127434	0.349086871	0.189871026	0.198023074	0.656412071	1.584192707	0.318139176	0.403115966	0.236156628	0.356922489	0.401287625	0.864671184	0.816751868	0.269769477	0.93613278	0.018554069	0.119724716	0.981513607	1.035887675	0.790189796	1.250562477	0.381323106	0.551432865	0.420269348	0.125060085	0.880480846	0.073147253	2.360354901	0.071486245	0.264856607	0.213701394	1.069919795	0.725747331	0.208307075	1.693072242	0.488418235	0.315031491	0.097576235	0.307025811	0.130610881	0.344357201	0.692389777	0.371189413	0.226296833	0.318255381	0.542297202
E07000219	2013	0.465207599	0.600093802	0.630518613	0.338129841	0.185862684	0.186910032	0.641435905	1.53106592	0.30128012	0.3803986	0.222411441	0.32184278	0.394188578	0.868163411	0.772267048	0.255073976	0.869896193	0.017014842	0.123810463	0.941147179	1.009553214	0.737970415	1.185103246	0.356758557	0.52876669	0.38547942	0.118791701	0.827075905	0.078080308	2.196563474	0.069390865	0.259108709	0.20188741	1.031689211	0.695103609	0.205071366	1.542194396	0.442892027	0.309572007	0.117749551	0.284651246	0.126091817	0.351209491	0.655222295	0.355566155	0.222100479	0.310923986	0.519135445
E07000220	2013	0.473604216	0.610667904	0.636959149	0.334746372	0.194073711	0.187148919	0.661297483	1.421208354	0.294822129	0.383854316	0.219930606	0.319536822	0.404947639	0.850157039	0.768382952	0.253278764	0.868345311	0.017835728	0.127292629	0.93239579	1.012297475	0.731342786	1.181374879	0.351343807	0.529117804	0.379058969	0.122164401	0.81751943	0.0844463	2.157603172	0.070641792	0.264412731	0.20166347	1.031446421	0.67521898	0.206623009	1.56392811	0.42571228	0.316092165	0.123912717	0.281074376	0.126163553	0.369081525	0.663379464	0.351215995	0.230659311	0.325660104	0.524538811
E07000221	2013	0.532573023	0.652218086	0.689500158	0.361327066	0.2064172	0.2127555	0.703039131	1.430975612	0.323176572	0.417808447	0.245357626	0.364472857	0.431030774	0.859972807	0.830674937	0.276040767	0.968436905	0.019764134	0.137431359	1.013389054	1.056964842	0.812465595	1.271554437	0.39106281	0.5927134	0.419071548	0.137849499	0.931844592	0.078146208	2.407344258	0.073569246	0.278978052	0.227672307	1.127589043	0.716213889	0.218616343	1.826059032	0.488172366	0.333502492	0.101336287	0.313904575	0.135683376	0.401216609	0.730471394	0.368455139	0.243581948	0.349804939	0.557553792
E07000222	2013	0.474759805	0.61604739	0.635751272	0.331769849	0.198529711	0.185105725	0.658431357	1.406855361	0.289870403	0.373742182	0.21235426	0.31925188	0.411429422	0.842658779	0.770193717	0.25087531	0.860138134	0.017814704	0.121612715	0.917727014	0.999445833	0.719543332	1.162521662	0.338998695	0.523927653	0.373352379	0.123421626	0.811329625	0.085607218	2.109467485	0.069799582	0.263048719	0.198141855	1.023958244	0.668971599	0.205047009	1.563415775	0.423614423	0.314460621	0.120138924	0.271749013	0.121242899	0.358939583	0.65721773	0.35513094	0.228677781	0.321744948	0.527167054
E07000223	2013	0.517562228	0.629186209	0.682858109	0.363741833	0.202856516	0.206624501	0.689060286	1.536355289	0.326627459	0.407903199	0.238944465	0.353541437	0.422422694	0.859596332	0.830328534	0.27191542	0.938350473	0.019028013	0.132790911	1.001167131	1.040553926	0.79750623	1.245813628	0.383586013	0.577478284	0.410092174	0.123975357	0.901226378	0.077875034	2.368961632	0.073253471	0.274661773	0.224686339	1.104257514	0.720814511	0.220312765	1.677464687	0.480043352	0.326077892	0.108183794	0.305640377	0.131819132	0.387571387	0.688791065	0.357352098	0.239621181	0.332470583	0.552652609
E07000224	2013	0.53397026	0.640426979	0.693192499	0.378262405	0.206900975	0.220085606	0.702068711	1.588116631	0.328564338	0.424918745	0.254686589	0.372887533	0.422893519	0.874664601	0.842412864	0.280840941	0.965090308	0.020822953	0.125579139	1.048013571	1.077366828	0.847173288	1.302481452	0.414189234	0.606510834	0.421936522	0.126495399	0.941315513	0.077498707	2.502322087	0.071539375	0.280341729	0.238143597	1.108153622	0.736120778	0.227866177	1.764269299	0.519887904	0.340963834	0.103216339	0.326918566	0.141958633	0.396830591	0.749626402	0.369276803	0.247210245	0.344693592	0.552568657
E07000225	2013	0.546574232	0.658559506	0.704412247	0.375717978	0.210668213	0.219757516	0.712486849	1.50018604	0.333274903	0.426302382	0.251573191	0.373278683	0.43506697	0.876979899	0.853288298	0.282656482	0.985174701	0.021204093	0.133941952	1.045785235	1.076089653	0.841673453	1.299911401	0.40557569	0.611214905	0.427591312	0.133490457	0.961490122	0.077880699	2.501244606	0.073438081	0.286101075	0.237817739	1.140953669	0.735764828	0.225596261	1.846178848	0.512406263	0.339655182	0.099142414	0.324718333	0.138586765	0.405238071	0.750807068	0.37291907	0.250448553	0.355122597	0.565290008
E07000226	2013	0.441240073	0.587140156	0.607884085	0.327556193	0.183784084	0.171540871	0.630051439	1.483467842	0.287516481	0.365616921	0.203846729	0.293235684	0.388330774	0.85840063	0.741423408	0.243948927	0.80849575	0.01613516	0.118887704	0.897862169	1.001219287	0.686262469	1.136708878	0.327036564	0.493298858	0.359431717	0.10913577	0.750138922	0.087002927	2.006584289	0.071802899	0.25130594	0.186112893	0.988600527	0.666756835	0.202844367	1.338451092	0.393683236	0.30813703	0.146034313	0.263277237	0.119879257	0.342691944	0.59164761	0.342621965	0.216788101	0.304405212	0.519024021
E07000227	2013	0.550557907	0.671280044	0.705882514	0.368577013	0.21883638	0.212039365	0.727732049	1.362689303	0.330978312	0.420444647	0.241774925	0.371753389	0.449341189	0.886123787	0.847140839	0.281955621	0.987567344	0.020970476	0.138336549	1.027720663	1.074249283	0.807272298	1.276768631	0.38064217	0.588904646	0.428516028	0.141173535	0.939540436	0.082845663	2.400845237	0.074845319	0.288815259	0.222992857	1.168406285	0.728482478	0.2184295	1.872583818	0.485829896	0.336134477	0.11500769	0.305167634	0.13154323	0.397742916	0.721767532	0.380268029	0.247107331	0.357512842	0.581100673
E07000228	2013	0.528856076	0.663462967	0.685403453	0.369500403	0.210805609	0.204216979	0.706462585	1.41752921	0.322819299	0.415276375	0.232802613	0.35848948	0.43875291	0.894774091	0.843023608	0.277179543	0.966085431	0.02072922	0.131507421	1.0058264	1.07117165	0.789942458	1.265515696	0.372225082	0.571385542	0.421762252	0.136694465	0.90529754	0.08044542	2.357695221	0.076206274	0.284229443	0.215176988	1.132888919	0.731247116	0.216182953	1.793784689	0.480345543	0.330609587	0.122636533	0.297091113	0.128774047	0.372663416	0.688686991	0.387610349	0.238795996	0.342328263	0.575160723
E07000229	2013	0.506159462	0.627317172	0.667354629	0.357041012	0.196828275	0.199926596	0.677021793	1.616755108	0.324804424	0.414374398	0.241351117	0.344724478	0.409120574	0.887005768	0.814394232	0.271181415	0.926432447	0.018624555	0.131254507	1.007404517	1.059910721	0.792697069	1.263661493	0.389785714	0.568677894	0.405965371	0.122416691	0.884344847	0.081822017	2.392899284	0.075033435	0.274460771	0.220572268	1.077099859	0.727797021	0.218116454	1.623639023	0.468872457	0.330732213	0.115796501	0.311976813	0.139047717	0.383902193	0.705495174	0.374376778	0.233569958	0.334760141	0.546858285
E07000234	2013	0.516465711	0.643087692	0.673245324	0.351098423	0.204451366	0.205363819	0.688839157	1.35944394	0.316696918	0.405028775	0.234064515	0.356817456	0.422489256	0.844311248	0.819772086	0.270619957	0.952839218	0.02021724	0.128333443	0.982625704	1.041054134	0.788324851	1.242764856	0.374409637	0.566382805	0.419352861	0.134285572	0.909831667	0.074445217	2.35123327	0.072438909	0.276251454	0.215939636	1.106585827	0.714604575	0.210637444	1.82047564	0.485937474	0.320853156	0.097775744	0.300629685	0.12730027	0.369596721	0.70071332	0.369582246	0.2367348	0.332630238	0.554684026
E07000235	2013	0.527195603	0.640141905	0.687944678	0.359936441	0.205677524	0.215664918	0.698018688	1.46412178	0.321429279	0.411542463	0.247110333	0.366527751	0.423275063	0.853057765	0.826457369	0.275157645	0.951023702	0.020479503	0.132844014	1.018617847	1.043112037	0.821144313	1.270835568	0.395832844	0.589418404	0.418242087	0.131065073	0.923752145	0.077629487	2.399317652	0.070265543	0.278550584	0.234305744	1.11509494	0.714077114	0.220478521	1.789707731	0.494521363	0.329431267	0.095181809	0.316942741	0.136060958	0.399942628	0.726985018	0.35390871	0.245337839	0.349366195	0.548303218
E07000236	2013	0.441164262	0.582850484	0.611025958	0.325875828	0.178695816	0.180366223	0.626775752	1.480056991	0.285988763	0.358177628	0.208506094	0.303899596	0.391459636	0.829738299	0.737616713	0.24228076	0.819222202	0.016400849	0.121765306	0.898429451	0.976669844	0.69886559	1.133540417	0.335616734	0.502466579	0.367466392	0.113747132	0.774292686	0.078972378	2.032166567	0.069443877	0.24633242	0.191288242	1.00184731	0.66168997	0.199122294	1.429779845	0.415417158	0.299757766	0.120851177	0.264603345	0.120474196	0.341737317	0.605238719	0.333816057	0.217893889	0.301262086	0.509990631
E07000237	2013	0.452834784	0.594561273	0.611734786	0.330890776	0.180020191	0.177885756	0.620942409	1.544518316	0.301330052	0.37482026	0.21411103	0.315864829	0.384772878	0.854460465	0.766759622	0.250317775	0.855315923	0.016992575	0.115309278	0.918403975	0.992472051	0.720458838	1.166674237	0.343568127	0.505665684	0.378819592	0.112326848	0.801850097	0.076177195	2.163230698	0.073244731	0.25200889	0.193443012	1.002682519	0.689559483	0.197778688	1.483553588	0.432460387	0.301884967	0.112819853	0.275616144	0.122284693	0.322404892	0.626640621	0.362147644	0.211524209	0.301112965	0.5177335
E07000238	2013	0.515141195	0.635799438	0.67418964	0.35888961	0.197962622	0.208996149	0.677570891	1.484387645	0.32293894	0.409902937	0.244276654	0.359752698	0.41226075	0.85707839	0.82309888	0.272509098	0.951221477	0.019551151	0.130304465	1.007655424	1.045398358	0.807974566	1.262625369	0.390684926	0.580557346	0.420451623	0.130654683	0.922977249	0.074087184	2.404447282	0.072591549	0.272583658	0.225759505	1.10614595	0.724357683	0.214305644	1.786747481	0.494414672	0.323182624	0.093605088	0.314898917	0.134364562	0.376856506	0.720387643	0.36502294	0.236905339	0.33569094	0.545377685
E07000239	2013	0.48954133	0.615454232	0.654037231	0.353065159	0.190658407	0.202133527	0.655963492	1.55902127	0.312480403	0.395152135	0.236283623	0.346791107	0.403016272	0.846729161	0.800101262	0.262817882	0.914762384	0.018880843	0.123304295	0.976456867	1.016751329	0.784189407	1.227128066	0.380374939	0.558463703	0.40523749	0.120685113	0.886544378	0.07372268	2.332732206	0.071937915	0.263254308	0.21810295	1.060440812	0.708385955	0.209790209	1.672382269	0.483940677	0.316367986	0.094793012	0.298997831	0.131726358	0.36131062	0.693790547	0.356025577	0.229063106	0.321734964	0.528779208
E07000240	2013	0.514951642	0.639094456	0.663740339	0.343797437	0.215253654	0.189233021	0.698764614	1.19365436	0.303100014	0.394874771	0.215038341	0.326365496	0.432976369	0.852219188	0.790752808	0.261737743	0.908253176	0.020428414	0.136399307	0.945409005	1.028111016	0.730017467	1.184321123	0.336787839	0.528872193	0.392572334	0.134199377	0.843075594	0.08521228	2.165910982	0.074591682	0.280283765	0.194030243	1.086290705	0.675609944	0.205734753	1.688069034	0.41949256	0.318892165	0.150146999	0.268778124	0.120158073	0.371676517	0.643158176	0.37439996	0.235150824	0.336435018	0.559755612
E07000241	2013	0.451988703	0.589984371	0.616107571	0.320222548	0.187045059	0.176173583	0.650239308	1.296680424	0.279841768	0.362964178	0.204754316	0.29249842	0.389813557	0.819840446	0.72754733	0.241380283	0.809411598	0.016603721	0.1260413	0.879633514	0.978691163	0.681250682	1.118082449	0.323738796	0.502091447	0.35249352	0.117917433	0.765637137	0.086689476	1.99653332	0.069523525	0.254775421	0.189812343	0.986415615	0.638123945	0.200954563	1.430542839	0.387594854	0.305508424	0.130784748	0.262978932	0.119366198	0.366295206	0.637382275	0.330714442	0.226552874	0.310384205	0.511377245
E07000242	2013	0.514682987	0.652311107	0.670903037	0.355069835	0.204766497	0.194362009	0.688335957	1.40306818	0.322804962	0.406290179	0.226057518	0.342933928	0.429013396	0.896865583	0.824936794	0.272110192	0.948080605	0.02009066	0.136124524	0.9889145	1.057413147	0.767181092	1.241963229	0.360356527	0.549196869	0.418509116	0.133127323	0.892455835	0.079968746	2.31620292	0.077924998	0.28055675	0.205963779	1.116576919	0.727437928	0.208855563	1.752099832	0.461763504	0.321440419	0.120339325	0.291400779	0.125690336	0.361568336	0.670301717	0.388515448	0.232514909	0.333742883	0.569571805
E07000243	2013	0.440330153	0.586532651	0.611180251	0.324952038	0.183941094	0.175446789	0.629849676	1.423665553	0.287980986	0.360760994	0.205204224	0.301210857	0.389006305	0.836845818	0.73938528	0.245569256	0.815044571	0.016234566	0.118315003	0.8909136	0.983927292	0.693045518	1.132836814	0.32876673	0.497421753	0.363239904	0.113429092	0.764693459	0.080488341	2.035038809	0.069742699	0.25272024	0.18598225	0.99346719	0.663042974	0.200138653	1.432515766	0.40868616	0.300855903	0.126349769	0.266610781	0.117650075	0.338520613	0.606469823	0.338009461	0.218107706	0.298347246	0.515431167
E08000001	2013	0.429829656	0.559448602	0.598423045	0.313241729	0.181811635	0.177890624	0.623046164	1.487809907	0.283928453	0.356409378	0.209543024	0.291935098	0.379256403	0.818885569	0.720502219	0.239780035	0.790649307	0.015360715	0.119459686	0.892515315	0.972511278	0.691097376	1.12824381	0.340745936	0.490907332	0.347971938	0.106412562	0.736557757	0.089579831	1.988410207	0.063621358	0.247359636	0.192517963	0.969242604	0.650182841	0.202449817	1.322961395	0.391309358	0.304773053	0.124598669	0.265273756	0.124986847	0.357499951	0.602519845	0.32586971	0.220125195	0.303705235	0.488952531
E08000002	2013	0.46556192	0.597754422	0.627626873	0.334537159	0.188384234	0.184029616	0.641226846	1.498658595	0.301542943	0.380702879	0.218442086	0.31950374	0.393583199	0.85099511	0.769954794	0.256477839	0.866103262	0.016963027	0.12273684	0.931740823	1.001075631	0.729026419	1.177376956	0.351155619	0.519932563	0.382438156	0.1172803	0.811651972	0.07901266	2.169008386	0.070176766	0.260094999	0.198017145	1.026834525	0.687686366	0.203502993	1.52908799	0.434720215	0.308349241	0.117838594	0.279288348	0.12378872	0.349126786	0.636667097	0.354467749	0.221964072	0.310275129	0.523221573
E08000003	2013	0.352418281	0.502462172	0.523941946	0.270194674	0.154867907	0.142837752	0.558901813	1.369191224	0.240998355	0.303708468	0.172606584	0.22762898	0.332298249	0.789257717	0.625594738	0.199388183	0.645127511	0.011450143	0.109998621	0.754824716	0.871993177	0.555865898	0.968117847	0.273872074	0.410069632	0.282563198	0.088399822	0.608437228	0.101339426	1.627345664	0.062103524	0.216210421	0.156806531	0.848754444	0.565225348	0.183822844	0.965183384	0.298833964	0.280606882	0.151534507	0.225402855	0.111101505	0.332996603	0.519222736	0.285775222	0.195030517	0.265286808	0.439438557
E08000004	2013	0.414600236	0.538070542	0.579207363	0.30994576	0.174190197	0.171441787	0.606845667	1.490187292	0.280745032	0.349289773	0.20409739	0.279969313	0.366087932	0.81384018	0.700908569	0.235526555	0.762810989	0.014463916	0.118085418	0.875910387	0.956060658	0.669660648	1.099480015	0.33230053	0.476309183	0.335778778	0.100544452	0.703122841	0.089078821	1.920956683	0.062009674	0.241495271	0.186916136	0.943563339	0.638156602	0.198851527	1.233389856	0.373511845	0.297686042	0.134212244	0.259737827	0.122953255	0.347395131	0.570132297	0.314858735	0.212286934	0.29470831	0.474794424
E08000005	2013	0.423436371	0.551514231	0.588507997	0.30948925	0.177008543	0.174320525	0.614678779	1.512698507	0.285192106	0.357525943	0.209644921	0.289857704	0.37016979	0.824966884	0.713363565	0.239702859	0.784074612	0.015040687	0.117065262	0.891815318	0.974558052	0.687224833	1.125953633	0.340336508	0.482369259	0.346502818	0.103114438	0.724966826	0.089938009	1.995556144	0.064118742	0.245696614	0.190817337	0.958048637	0.650553585	0.200743141	1.279936045	0.387748632	0.302268927	0.126000774	0.267960559	0.126445564	0.353609784	0.58678532	0.326458258	0.216506276	0.301319389	0.486185269
E08000006	2013	0.416735743	0.557292193	0.580508646	0.311848694	0.167639337	0.166380088	0.588914625	1.573228875	0.282479251	0.352132815	0.206445403	0.287127003	0.358183696	0.84300848	0.712661924	0.233881086	0.786053693	0.014372251	0.116070739	0.868288029	0.952066727	0.674754288	1.107352794	0.327982558	0.480120765	0.349302746	0.10220029	0.75426659	0.080725769	2.040195101	0.069482741	0.23832545	0.183449723	0.941760268	0.653219666	0.19244771	1.304848213	0.392562883	0.292157739	0.119282039	0.266830265	0.122156389	0.328352336	0.612833873	0.336916233	0.203188287	0.285990254	0.485344372
E08000007	2013	0.482168618	0.610072783	0.641009375	0.339349476	0.195931549	0.191503015	0.661736751	1.463856103	0.305011502	0.388190358	0.224301708	0.326226478	0.405230632	0.850452016	0.780443633	0.25924886	0.882501627	0.018120889	0.125697337	0.958821648	1.021631627	0.752507194	1.202249141	0.361650542	0.536963504	0.387486591	0.120210831	0.833928124	0.082236568	2.223559117	0.0708223	0.267547556	0.207027694	1.041069067	0.69393242	0.209182179	1.582789309	0.444048383	0.316434891	0.115773087	0.287281994	0.12750571	0.366819258	0.662130239	0.357660017	0.231773425	0.325724389	0.528135568
E08000008	2013	0.449137387	0.581271713	0.612297266	0.333320338	0.175699063	0.179783801	0.617678774	1.65990836	0.305367209	0.379488402	0.222344514	0.317356065	0.377210529	0.872595914	0.763933273	0.252495204	0.850870481	0.01574224	0.121574826	0.93419138	1.000320377	0.733404874	1.184221891	0.358601217	0.513611318	0.381902196	0.11042245	0.80927094	0.077705115	2.202418079	0.069926166	0.252668125	0.198429468	1.007435885	0.698128366	0.201134151	1.431726002	0.434259477	0.304982763	0.117166582	0.28643361	0.129593446	0.340027999	0.635817154	0.355338259	0.211821084	0.300040057	0.510792914
E08000009	2013	0.468366549	0.599102255	0.624015333	0.329038851	0.192531628	0.18361106	0.65064125	1.408038061	0.299969717	0.3792693	0.215783595	0.312493673	0.398054776	0.838478384	0.760028863	0.252243473	0.855108187	0.01753691	0.124318204	0.931424537	1.006871775	0.724625953	1.175541267	0.346138297	0.514729345	0.374601998	0.116769718	0.797382965	0.084361586	2.140141309	0.071413645	0.262259785	0.196467872	1.018796537	0.680572932	0.204438107	1.509367485	0.420237561	0.309789185	0.123646352	0.277943288	0.124732337	0.355865346	0.634907573	0.352789578	0.225574786	0.317829711	0.523474064
E08000010	2013	0.468650464	0.606398463	0.630441239	0.341794167	0.182366478	0.187310701	0.633660878	1.615153075	0.311393951	0.392874515	0.227377476	0.334263438	0.39009585	0.874605651	0.790522446	0.26094144	0.898923304	0.017245025	0.120313795	0.954080269	1.017742857	0.757350399	1.215432202	0.366183975	0.528513823	0.400670815	0.117955602	0.846777083	0.072676098	2.288641077	0.070627797	0.258851583	0.202584843	1.040327382	0.714326663	0.202060168	1.584705815	0.462655527	0.307969485	0.10649688	0.290326743	0.128413262	0.333232719	0.664848475	0.36997975	0.216460621	0.308049532	0.528620433
E08000011	2013	0.45733131	0.594588819	0.619458398	0.338589124	0.17754722	0.182619631	0.620388988	1.610919986	0.313696922	0.391267352	0.228237629	0.32603061	0.377316862	0.882858261	0.782656355	0.25902667	0.88037077	0.016299658	0.118577419	0.955541941	1.019162906	0.750292403	1.211015778	0.365820866	0.52608948	0.395963008	0.113030325	0.842882423	0.071801514	2.300261146	0.071657039	0.255068182	0.200897426	1.019529798	0.720161846	0.200877592	1.503952475	0.452487719	0.303703464	0.105857905	0.295360266	0.130029348	0.327501479	0.653840715	0.367199155	0.211514998	0.300281625	0.519872029
E08000012	2013	0.423137273	0.572975613	0.592228803	0.313394322	0.171444071	0.169783132	0.596035759	1.599393566	0.289244133	0.359530029	0.2099503	0.299427855	0.368017931	0.858359221	0.737340565	0.239428087	0.80977699	0.015135886	0.115634207	0.884361613	0.965381786	0.691069602	1.132631752	0.33569525	0.488356429	0.360352257	0.1060133	0.779078524	0.080215865	2.113544457	0.070284991	0.241390387	0.187317202	0.954297416	0.670353744	0.192639142	1.368305746	0.409560347	0.29510265	0.103638638	0.27390747	0.123795865	0.3252344	0.64032313	0.348669977	0.204387416	0.290982757	0.492738237
E08000013	2013	0.473533031	0.604169618	0.633183436	0.344580777	0.18136583	0.192090755	0.636557001	1.627157663	0.315289829	0.394127047	0.232354662	0.339984289	0.388913451	0.871998648	0.793956037	0.262778036	0.90288965	0.017698976	0.119146563	0.968463163	1.018644432	0.772684965	1.227071469	0.375672278	0.539081559	0.403785461	0.116616765	0.86276847	0.072241799	2.329119651	0.071159403	0.258909943	0.209387203	1.043177776	0.71869519	0.203718567	1.595644483	0.471215824	0.310054646	0.101153312	0.299925456	0.132128402	0.337704458	0.67553066	0.36957732	0.218083238	0.309537184	0.523212908
E08000014	2013	0.488914409	0.611636237	0.653678036	0.350752532	0.192025706	0.200121051	0.656116526	1.552279298	0.314212431	0.398466248	0.238023188	0.343767105	0.399887477	0.865383738	0.803895542	0.266521409	0.908763395	0.017883699	0.122400364	0.982270254	1.030341047	0.783982794	1.239581879	0.382387869	0.559437553	0.403274211	0.120444809	0.878013096	0.075722707	2.344583457	0.070264444	0.264355026	0.217052798	1.053768489	0.715791933	0.211655688	1.636565898	0.474881498	0.318797553	0.099043105	0.306164949	0.133263894	0.363287938	0.698814061	0.361423761	0.229170029	0.319712696	0.529796406
E08000015	2013	0.481798192	0.607122162	0.641212851	0.344364102	0.187981177	0.194114748	0.646070769	1.552909727	0.314060141	0.396347335	0.233342015	0.339897415	0.394952203	0.858709156	0.793126436	0.264135067	0.904170351	0.017948927	0.122794952	0.970398525	1.021584742	0.770156751	1.223425055	0.374255174	0.547165259	0.399809707	0.119055742	0.871011106	0.073850423	2.33277162	0.071637285	0.26363799	0.210980684	1.042312214	0.708456465	0.20635481	1.617962763	0.467169739	0.313009863	0.099511678	0.299520298	0.131365056	0.355960327	0.681793262	0.362649787	0.223304351	0.316426379	0.52727242
E08000016	2013	0.463471318	0.596195365	0.625802643	0.339257586	0.179409981	0.186852325	0.627868729	1.627697315	0.309206168	0.389023815	0.229529798	0.332454777	0.381712853	0.874168087	0.781471152	0.258994467	0.886859082	0.016852016	0.118133841	0.953934968	1.010040393	0.758318425	1.210146047	0.37028958	0.530239418	0.397131146	0.115388619	0.847351774	0.072854752	2.296672	0.069065598	0.255587298	0.205232496	1.026780337	0.713140656	0.202472137	1.554145852	0.462142502	0.306781812	0.104027281	0.296083083	0.129734123	0.333352545	0.671663201	0.366220013	0.215261325	0.304799304	0.518004725
E08000017	2013	0.452057746	0.581645356	0.608880721	0.334119812	0.174255926	0.183776785	0.613703565	1.604041344	0.302934858	0.382336071	0.225588189	0.323083956	0.372712971	0.856340661	0.760081598	0.252623669	0.864349503	0.016707836	0.116037559	0.936527243	0.994845353	0.743609078	1.188385808	0.364479993	0.520339221	0.386631124	0.111778419	0.8280355	0.071953986	2.250511657	0.067523394	0.248418196	0.200494365	1.001371739	0.699796452	0.198671403	1.496823774	0.451056438	0.300346541	0.104592343	0.290753328	0.128343385	0.328958132	0.661631319	0.357000149	0.210417912	0.300266461	0.505476588
E08000018	2013	0.451853541	0.579939138	0.61288051	0.330893906	0.17807439	0.184997053	0.622934744	1.58202984	0.302212366	0.379961455	0.224497889	0.321846626	0.377139688	0.852077385	0.758282116	0.252312014	0.853616793	0.016695043	0.117151662	0.935928217	0.996307151	0.742512221	1.186228603	0.364060979	0.51743266	0.383075768	0.110854449	0.812567053	0.077644321	2.207012	0.066390125	0.250291138	0.201527409	1.004475996	0.693158829	0.201968011	1.468866513	0.442800072	0.305854108	0.108060638	0.288539307	0.128628248	0.340868584	0.648824351	0.350709693	0.215382978	0.303732471	0.506402773
E08000019	2013	0.419053081	0.55375677	0.584440295	0.30462606	0.175335978	0.169612991	0.601094638	1.429529643	0.275918603	0.344447631	0.202113018	0.281501325	0.364349302	0.816625171	0.706851402	0.231342395	0.767765445	0.014852943	0.115702013	0.858380061	0.943164113	0.664002914	1.087492048	0.323526558	0.478277523	0.338898998	0.104172195	0.728431214	0.086132734	1.943822118	0.064405871	0.239038593	0.185185187	0.937273302	0.633704374	0.195601249	1.297134355	0.382876351	0.295296921	0.120743431	0.259962021	0.118941042	0.340322191	0.608131558	0.320401572	0.211367808	0.291759761	0.482309894
E08000021	2013	0.402795425	0.545925475	0.571516786	0.296921302	0.16688413	0.166355578	0.58947873	1.472362526	0.275477018	0.341578384	0.197325413	0.279239258	0.36044423	0.805625911	0.704901671	0.227471428	0.763716784	0.014205641	0.111143507	0.841022721	0.929138636	0.65353067	1.079927192	0.319289035	0.460479574	0.336117263	0.103309134	0.71859495	0.085283581	1.950451618	0.065663181	0.232020006	0.179313247	0.916239848	0.631107073	0.189932897	1.270652406	0.379241791	0.289891532	0.105431616	0.25764749	0.119547189	0.3312322	0.61125299	0.325079494	0.204794476	0.283369811	0.477258139
E08000022	2013	0.476616012	0.611879567	0.643668303	0.344996466	0.186674078	0.193026101	0.645944394	1.627725674	0.31513167	0.397744504	0.234551048	0.337378524	0.395185199	0.873682436	0.79377973	0.26382734	0.901097407	0.017807449	0.120162299	0.975215047	1.0338533	0.773901812	1.234818745	0.377235209	0.542196574	0.400875135	0.115580265	0.861561761	0.07670174	2.335433964	0.073558261	0.262003475	0.210562621	1.041180381	0.721695347	0.207611816	1.568776558	0.470246605	0.315718566	0.101888784	0.302389063	0.133467281	0.34670901	0.677637016	0.369411578	0.222060494	0.315999234	0.531099594
E08000023	2013	0.469682313	0.604076902	0.636757584	0.342501147	0.184388408	0.192074335	0.639859257	1.634276587	0.313717048	0.391186454	0.233245969	0.336116998	0.390520115	0.874101303	0.786591409	0.262551246	0.891064937	0.01725307	0.121091061	0.965471811	1.019867073	0.770509305	1.225481858	0.376715963	0.540305012	0.39862628	0.114567946	0.859082903	0.076531005	2.329653438	0.070421849	0.260603872	0.210703596	1.038880385	0.714912405	0.206177104	1.558181283	0.463311562	0.313348415	0.099349711	0.302749385	0.132724119	0.348108725	0.687494434	0.364487875	0.220737694	0.312582906	0.519179123
E08000024	2013	0.460444676	0.59453536	0.628566328	0.338512335	0.179221991	0.188436326	0.629817185	1.694142177	0.313153352	0.390697998	0.233746949	0.332948916	0.380841113	0.885591062	0.784567766	0.260403386	0.88265421	0.016566465	0.119028804	0.962294593	1.02205835	0.765828346	1.22154116	0.378294142	0.532457253	0.397512453	0.112975605	0.847055209	0.077040257	2.314726297	0.069211816	0.255500277	0.208208185	1.027292307	0.720662536	0.205037868	1.502653669	0.463385562	0.311087084	0.101595879	0.302734726	0.133928749	0.342395101	0.675649788	0.367383402	0.216989865	0.305821677	0.51795143
E08000025	2013	0.367589461	0.486768961	0.540684783	0.262546252	0.171338351	0.154981296	0.594308116	1.200455837	0.237722439	0.300000654	0.175963104	0.221998836	0.349152129	0.750447186	0.605622591	0.203769905	0.62868259	0.011870013	0.114694817	0.775264552	0.889395289	0.564366813	0.973177594	0.284863014	0.427189425	0.274302571	0.089344353	0.573559027	0.10833461	1.532170888	0.054378757	0.225024782	0.167040022	0.855294384	0.544271649	0.195980094	0.944104984	0.28345213	0.290745134	0.158755621	0.226649156	0.115169757	0.368468545	0.50214265	0.260339216	0.216757345	0.286599891	0.432047615
E08000026	2013	0.40623682	0.535393973	0.574199302	0.290785259	0.17762014	0.165165958	0.61066282	1.335430508	0.260933766	0.332508419	0.192363554	0.26185348	0.366365131	0.795704152	0.676483376	0.223975911	0.723012232	0.013968036	0.116807975	0.83588282	0.933369313	0.632234744	1.053981545	0.310790796	0.463277532	0.315962522	0.101227258	0.671575148	0.097825135	1.795467143	0.060128926	0.237800399	0.180004014	0.919004965	0.601211748	0.198564687	1.179013022	0.345129098	0.299349264	0.141267065	0.248805147	0.118464777	0.358116794	0.569998899	0.3010243	0.218551987	0.297629557	0.468958304
E08000027	2013	0.458586141	0.584799464	0.621557224	0.332623561	0.183161978	0.188844129	0.63327033	1.500867217	0.298936488	0.375664679	0.222492013	0.320318977	0.386151559	0.841674371	0.76230008	0.250761973	0.851895603	0.016976965	0.116344721	0.929125764	0.997585885	0.737895789	1.177217682	0.358415221	0.524167451	0.379937767	0.113863414	0.811287269	0.078291547	2.167035144	0.068053155	0.253249231	0.202316987	1.006355626	0.685254558	0.203887149	1.502866627	0.441842297	0.307060151	0.110092949	0.285568582	0.126854804	0.346051362	0.651447769	0.346872489	0.22176456	0.306302197	0.510073419
E08000028	2013	0.395126987	0.519444326	0.567696732	0.291639334	0.173592356	0.166322016	0.602989534	1.370463809	0.264107492	0.328997452	0.193958014	0.257322183	0.359142316	0.800175712	0.659923662	0.222606831	0.706036802	0.013175169	0.114905532	0.83960567	0.939535286	0.628576925	1.053438798	0.315773082	0.465920738	0.311078342	0.095059463	0.653554669	0.098387702	1.770184847	0.058255808	0.234319361	0.180370525	0.915728633	0.607072892	0.200778585	1.100724336	0.339960124	0.300000464	0.14561482	0.253122055	0.121269447	0.354723444	0.538173622	0.291670523	0.215534311	0.28917983	0.460099606
E08000029	2013	0.485621352	0.607290116	0.641715475	0.334009549	0.19886589	0.194886523	0.667886866	1.380249133	0.301738611	0.386350038	0.225573174	0.328995859	0.405545462	0.836545482	0.771419783	0.258281461	0.880142178	0.018689482	0.12378859	0.952097586	1.01885189	0.750882341	1.199256508	0.363214789	0.536837269	0.386765268	0.122778837	0.832972697	0.08456902	2.193228042	0.067749306	0.265330519	0.207947689	1.040480277	0.684226989	0.209126672	1.59624833	0.442533467	0.319045193	0.112239198	0.288876042	0.128017055	0.372222407	0.671950816	0.350638721	0.233958364	0.328508676	0.527024394
E08000030	2013	0.417425682	0.538864259	0.584513832	0.307427551	0.174384745	0.175617896	0.611148847	1.473567889	0.280438925	0.351577877	0.210307344	0.286512867	0.361926227	0.818239345	0.697940313	0.233835388	0.766659882	0.014768913	0.113313331	0.882566514	0.963331685	0.681943017	1.112022047	0.341092015	0.488429479	0.339926738	0.101639107	0.722924491	0.090960033	1.959507032	0.061344737	0.239774203	0.191163614	0.943313541	0.641536737	0.201928989	1.242000693	0.386888342	0.302703294	0.126073661	0.272671868	0.126237337	0.35536697	0.588624585	0.31485549	0.216053585	0.295649461	0.479089599
E08000031	2013	0.408062695	0.533425853	0.578058132	0.294948133	0.174012726	0.17028667	0.611410293	1.440104464	0.267768173	0.337528023	0.203215098	0.269638622	0.361301791	0.809629016	0.677041805	0.226334877	0.732572506	0.014070653	0.118236941	0.852899805	0.942953292	0.652249121	1.078356805	0.32602702	0.477093079	0.324673564	0.098355281	0.694336509	0.096402626	1.866662704	0.060177163	0.238421993	0.18771882	0.927723592	0.615151711	0.201430998	1.177740704	0.357479729	0.301459099	0.132598353	0.264260067	0.124327684	0.365417104	0.58098514	0.299322671	0.217005306	0.295830658	0.467695529
E08000032	2013	0.394563356	0.510531012	0.556733325	0.294031367	0.172195705	0.162638571	0.592341486	1.392936786	0.264029663	0.329649519	0.190678334	0.25505581	0.354046151	0.784338417	0.659233545	0.224295472	0.712505775	0.013531492	0.115112413	0.833652229	0.924365068	0.626835461	1.04387957	0.311984596	0.450722837	0.312554104	0.095177653	0.648273796	0.092130876	1.767611941	0.058302918	0.234477671	0.175848529	0.90657035	0.602421998	0.194776795	1.119230431	0.338868243	0.288945056	0.147581474	0.242109433	0.116968214	0.343009513	0.539284374	0.296479248	0.209175887	0.287456317	0.450686293
E08000033	2013	0.457175923	0.587297062	0.620912895	0.327691884	0.184270689	0.184094362	0.630099029	1.539290472	0.300090111	0.376591805	0.220280639	0.315315809	0.385918212	0.838784248	0.757379064	0.25114416	0.854637034	0.0166007	0.122951102	0.929628705	0.993016563	0.729634186	1.176366802	0.354745427	0.516445514	0.380373173	0.114013928	0.810855535	0.07858347	2.178779177	0.067974993	0.256331941	0.199405996	1.011826495	0.682441685	0.202391569	1.493197876	0.433802032	0.30549962	0.11040755	0.28150744	0.126481902	0.351374226	0.642872971	0.349109685	0.2199275	0.309866717	0.511374639
E08000034	2013	0.428483586	0.557586871	0.59420051	0.309981031	0.181837972	0.176050596	0.623077794	1.46295139	0.279223204	0.353962637	0.207800869	0.289472107	0.378215236	0.815441391	0.711196164	0.235747747	0.781677745	0.015424113	0.118975409	0.886177895	0.968016057	0.683627632	1.117781274	0.336967849	0.487499698	0.34299637	0.106052095	0.730969035	0.091472064	1.96114297	0.062748514	0.246849087	0.190744935	0.964885334	0.641129289	0.201545075	1.308739926	0.386331285	0.30624543	0.129990803	0.26424604	0.1238812	0.35931937	0.59467047	0.321722953	0.220269694	0.304291276	0.48811673
E08000035	2013	0.423306899	0.563552225	0.590247533	0.307472476	0.176731192	0.169516821	0.60797352	1.438859657	0.275971221	0.350065047	0.20295155	0.285408159	0.371501284	0.822843067	0.714225253	0.232562646	0.777937843	0.015021143	0.116527657	0.86053489	0.951284167	0.666661477	1.096050548	0.32266491	0.480932017	0.342493715	0.105918182	0.735261713	0.086664389	1.961526599	0.066584658	0.240739054	0.184438463	0.946311689	0.635241352	0.196102414	1.309578551	0.383439064	0.298937177	0.122864796	0.260652008	0.119614776	0.34153686	0.608353111	0.326270973	0.211785783	0.295498402	0.490105652
E08000036	2013	0.456870697	0.589294568	0.622752834	0.332631275	0.180658916	0.186044456	0.628738377	1.603284412	0.303570701	0.379609042	0.22491817	0.325257893	0.383572919	0.85182341	0.767726451	0.253616711	0.864365515	0.016543238	0.119404391	0.93667908	0.997651595	0.744960794	1.187628056	0.363473127	0.522411025	0.385921444	0.114152205	0.828145044	0.076479285	2.221573734	0.068611714	0.253272698	0.202976228	1.01657366	0.696054706	0.202813491	1.511548805	0.44781236	0.306858177	0.104990008	0.289151895	0.127908815	0.34368687	0.654465131	0.353604162	0.216936953	0.303630236	0.511913196
E08000037	2013	0.46780408	0.603471972	0.631315543	0.340410762	0.183069469	0.188795064	0.635240832	1.637227955	0.31027297	0.390050381	0.230116853	0.332698611	0.388518227	0.872526353	0.785757925	0.260223198	0.887713569	0.017094786	0.116656048	0.955496999	1.017221712	0.761724634	1.215337889	0.371191562	0.531460888	0.395955377	0.1148682	0.847153963	0.075580409	2.303315289	0.073524837	0.257942394	0.207166003	1.02350564	0.71307676	0.204018791	1.549119639	0.461695834	0.311003973	0.10247236	0.299026012	0.131306942	0.337092504	0.677582293	0.370065227	0.217905882	0.309810138	0.521605449
E09000001	2013	0.483948943	0.690741683	0.695655699	0.349105874	0.198833608	0.194538018	0.669075695	2.017748101	0.311681291	0.385592177	0.226576658	0.366555004	0.439246793	0.903599485	0.836264852	0.256541975	0.943371077	0.019676357	0.113660502	0.966915576	1.01526417	0.784839219	1.251487482	0.354070374	0.554749166	0.415971984	0.134443205	0.927953664	0.083088956	2.469378224	0.087396106	0.279793014	0.210347095	1.062086064	0.732156004	0.209577934	1.745107204	0.491178281	0.332322026	0.069565007	0.300052804	0.135350328	0.356083276	0.784981306	0.404641459	0.235519874	0.344628078	0.550063876
E09000002	2013	0.380507509	0.506200034	0.55108146	0.269447545	0.163862014	0.146318111	0.606510793	1.180831858	0.24073357	0.313655816	0.18162059	0.21394804	0.332169969	0.802072037	0.586679629	0.207122297	0.628654333	0.011394858	0.121646856	0.777416773	0.922907709	0.555510912	0.971994937	0.275217094	0.427597251	0.285283989	0.090232143	0.593889628	0.104019312	1.541149681	0.062022015	0.235312803	0.161531281	0.879982939	0.554578162	0.199356073	0.946184138	0.281329977	0.293358797	0.201890345	0.239271076	0.11315027	0.372997914	0.493652831	0.263391828	0.213531722	0.275503992	0.466461168
E09000003	2013	0.453709038	0.596105477	0.62595558	0.309587908	0.202388923	0.174002042	0.688188415	1.240012125	0.26309648	0.348548424	0.198264007	0.272540332	0.417854638	0.802345722	0.716041526	0.231456273	0.770895354	0.015943081	0.136866632	0.867261246	0.976201483	0.658121154	1.096186912	0.308342554	0.484167942	0.329781972	0.12083364	0.713484184	0.101472336	1.832162218	0.069820001	0.25968786	0.184554657	0.992416901	0.605846835	0.210574828	1.336008871	0.343470197	0.317189487	0.166014268	0.246665596	0.120231021	0.396930983	0.615053616	0.316203894	0.239362203	0.329427554	0.507006375
E09000004	2013	0.478767083	0.617921192	0.646117181	0.337444539	0.191172605	0.183693625	0.674492327	1.361996327	0.296341911	0.382879064	0.220715672	0.309800169	0.398400326	0.882935777	0.749278953	0.25346696	0.84852352	0.017975101	0.131117821	0.931236973	1.036669015	0.716390361	1.173795019	0.343954731	0.532484922	0.377202706	0.122707169	0.808215895	0.089037332	2.1195007	0.07290882	0.267913205	0.19905924	1.043690889	0.675928569	0.212498669	1.529624972	0.414735769	0.321269296	0.149532558	0.28674963	0.125781654	0.379910143	0.648456036	0.348246953	0.232638316	0.319050011	0.542392938
E09000005	2013	0.380048072	0.506401889	0.57413933	0.244925815	0.19484623	0.153584377	0.670555213	1.062701891	0.202924748	0.278701302	0.171855878	0.195556309	0.385020309	0.757306827	0.586370586	0.194465955	0.563122612	0.010433862	0.143493599	0.76467166	0.905319096	0.527929396	0.949528228	0.267031837	0.429367609	0.245535774	0.092915192	0.521121485	0.138783981	1.27809201	0.050077074	0.24083526	0.172386548	0.875068855	0.492062107	0.218187636	0.800099328	0.214730736	0.322348099	0.219921402	0.217662303	0.120440585	0.424666614	0.532327235	0.232310856	0.262467438	0.320578571	0.446892041
E09000006	2013	0.517086294	0.653735665	0.680350791	0.347249288	0.21697158	0.195393289	0.722261729	1.315352464	0.304541396	0.399732098	0.224188885	0.330056238	0.44119016	0.870345804	0.798322084	0.264235851	0.910267945	0.01974301	0.14011968	0.966599362	1.052488568	0.751082789	1.215608733	0.353127633	0.553556463	0.390256613	0.135084053	0.849022816	0.092052637	2.202557868	0.075918759	0.285897955	0.207624529	1.095483441	0.6841256	0.21827755	1.68338172	0.430027044	0.333864794	0.142117916	0.281731982	0.127449566	0.40288725	0.687132298	0.366616673	0.24795871	0.351140333	0.560231391
E09000007	2013	0.4389251	0.601108089	0.619929477	0.28561034	0.207853977	0.166058985	0.683542605	1.364471135	0.248088041	0.340448962	0.187841966	0.263946656	0.42818579	0.798317432	0.743612012	0.223048126	0.747040261	0.015925526	0.131204345	0.826464322	0.933271083	0.633500644	1.080511854	0.29829024	0.464255228	0.30329188	0.117510051	0.687080047	0.118473097	1.818467819	0.068589977	0.259111707	0.179918032	0.954236476	0.583197246	0.208329293	1.256763032	0.321110607	0.325698308	0.171533747	0.231798268	0.123137844	0.412110395	0.632644351	0.329580638	0.238895822	0.327501818	0.495748836
E09000008	2013	0.427552947	0.572136372	0.610370944	0.28899273	0.190070492	0.164201439	0.67119807	1.190663797	0.243918183	0.325796634	0.194034412	0.246939044	0.387779112	0.828052297	0.644145095	0.220814414	0.679503841	0.01339214	0.137936741	0.82108917	0.973238301	0.603033534	1.037775995	0.291842528	0.481886544	0.305346212	0.111248853	0.653138384	0.112772674	1.633425406	0.063577638	0.250649631	0.176948211	0.953176355	0.570705403	0.213199586	1.143373207	0.303680488	0.323232652	0.192717859	0.249527731	0.119926407	0.409204467	0.579501913	0.284780838	0.239221308	0.313531737	0.505019961
E09000009	2013	0.401158199	0.535659364	0.592360504	0.259931	0.204711797	0.161732362	0.683867218	1.125229047	0.22238924	0.301864944	0.176475335	0.219166204	0.403086152	0.762604851	0.635030843	0.206876991	0.626574476	0.01168403	0.136301381	0.800522599	0.932740472	0.574967448	1.003429146	0.280509546	0.444244805	0.271063249	0.104729397	0.566749838	0.130263764	1.447129427	0.055761558	0.247831028	0.173078979	0.911030532	0.532489321	0.217197635	0.952309824	0.253607909	0.324184881	0.198611216	0.223624065	0.121080943	0.420204338	0.573091632	0.262558932	0.259256504	0.323710729	0.46145073
E09000010	2013	0.425716847	0.564949827	0.59890204	0.2978968	0.182211518	0.16430448	0.651956057	1.28790087	0.261779033	0.341834828	0.197616514	0.255313321	0.373788196	0.836314166	0.667211333	0.225789655	0.720240103	0.01420668	0.131453045	0.847571243	0.973876311	0.62502972	1.064999105	0.305557706	0.472822823	0.321063101	0.106955047	0.681817611	0.105931051	1.762281073	0.067906168	0.250324231	0.178994903	0.959024306	0.604326396	0.207919833	1.185622543	0.329697337	0.313243651	0.177840459	0.255223036	0.120933315	0.382064061	0.570424776	0.303052276	0.229719197	0.304776437	0.50069179
E09000011	2013	0.412649195	0.556328635	0.58626829	0.289386191	0.180937181	0.15638101	0.638005127	1.255369602	0.24810084	0.333277193	0.186275421	0.242416253	0.370064705	0.825599596	0.649948085	0.215532652	0.692166443	0.013169843	0.124345534	0.811338424	0.962502055	0.597934332	1.035348216	0.286288644	0.454001467	0.305122764	0.102275986	0.661802793	0.110934563	1.691427199	0.066946797	0.246234914	0.170437899	0.933977619	0.581917895	0.205073233	1.111055105	0.310145299	0.311524017	0.19091192	0.238683547	0.117097341	0.382015162	0.555669341	0.29657556	0.226236724	0.299608914	0.495081796
E09000012	2013	0.369394402	0.537182809	0.548584743	0.277011738	0.167993155	0.140489005	0.630678613	1.185485678	0.211994189	0.298219151	0.16939416	0.209294372	0.360444023	0.784433086	0.605625495	0.188269549	0.610681012	0.011726333	0.128667086	0.718471386	0.882365813	0.531175489	0.939970031	0.248661541	0.419314155	0.265479161	0.095217268	0.623151124	0.120081159	1.494280045	0.069585052	0.22661764	0.15464295	0.855857839	0.515606243	0.195366827	0.957902965	0.25718763	0.30185967	0.206792404	0.20401853	0.109160302	0.360010433	0.523757295	0.274739773	0.220299181	0.279281251	0.460914112
E09000013	2013	0.452499316	0.628871786	0.628677429	0.306509694	0.209895277	0.163449979	0.689507399	1.300156797	0.251256499	0.341502479	0.182948186	0.270367959	0.440776161	0.819871621	0.747530716	0.224361326	0.777598244	0.016166336	0.132578269	0.820106455	0.961737476	0.631269395	1.073746284	0.283779484	0.470684676	0.326076996	0.118739168	0.747743109	0.108590347	1.8471107	0.076210931	0.25676232	0.170187994	0.981765303	0.595237206	0.202073767	1.341721616	0.338030973	0.326525622	0.156196498	0.226917123	0.115319285	0.368151918	0.623374141	0.344231606	0.229287769	0.320666086	0.519030462
E09000014	2013	0.404531519	0.567290733	0.584245166	0.282296785	0.184357579	0.155704637	0.664671987	1.291749166	0.238299059	0.318373506	0.184090362	0.236437363	0.389547842	0.805638156	0.667172955	0.212626722	0.682612049	0.012779559	0.133913423	0.792405397	0.935662968	0.588305433	1.01769594	0.275751982	0.444211598	0.301219584	0.107052131	0.658893389	0.109707542	1.646848691	0.070552541	0.24298768	0.167550367	0.92348158	0.564237114	0.204421224	1.12042094	0.297033353	0.31444458	0.179153846	0.228492138	0.116412927	0.377883869	0.565512844	0.297356771	0.231854066	0.300344566	0.490610345
E09000015	2013	0.418216152	0.536961452	0.609242797	0.273197028	0.21822306	0.171626692	0.698102952	1.084342871	0.232595659	0.309074282	0.188395473	0.226888204	0.415651523	0.778444476	0.637121585	0.214150101	0.650922777	0.012904711	0.137336307	0.850775123	0.975025613	0.609432545	1.046416064	0.298916335	0.466407527	0.279213002	0.100935108	0.575084879	0.134595067	1.486535561	0.051356137	0.256187332	0.1904035	0.936442896	0.550843666	0.22552464	0.97788991	0.267035017	0.332226139	0.197698095	0.238260006	0.129059577	0.415303241	0.568883403	0.262145107	0.269421918	0.355110257	0.466571069
E09000016	2013	0.494184844	0.624893196	0.65918558	0.343043052	0.201305843	0.195191663	0.683790411	1.443990128	0.306989471	0.395275262	0.228625638	0.328827273	0.413749114	0.869449921	0.790065488	0.263474473	0.898438271	0.018653554	0.129052891	0.963359264	1.042965048	0.757263587	1.216853798	0.365774143	0.547794708	0.392212157	0.124751994	0.839749792	0.087049687	2.230559175	0.071997137	0.272200137	0.209536448	1.064138337	0.697626216	0.214498667	1.614029948	0.44217831	0.326760522	0.122512261	0.29333985	0.129880922	0.381007892	0.690362707	0.363049705	0.238202125	0.332807012	0.540994412
E09000017	2013	0.434185526	0.562759992	0.611900458	0.289792024	0.211530999	0.168949977	0.671487109	1.129861607	0.250309848	0.330400092	0.18551851	0.250681088	0.411326013	0.79975456	0.680543227	0.227458329	0.703012535	0.014053742	0.133900843	0.857796423	0.973603452	0.626431229	1.062690266	0.303768273	0.479175389	0.302030606	0.109948552	0.616570606	0.116532054	1.644349028	0.057381344	0.257098699	0.183367806	0.956478364	0.585508245	0.21566575	1.138561982	0.307496721	0.319637425	0.182096897	0.233166257	0.120278423	0.398959367	0.596213347	0.293341572	0.253340973	0.336327087	0.486959399
E09000018	2013	0.413463842	0.538792308	0.596612256	0.271630761	0.205826065	0.161473832	0.670531786	1.210448978	0.237964967	0.315753972	0.179181343	0.228841703	0.401250145	0.792253378	0.659273309	0.21850399	0.6610009	0.012810711	0.137198387	0.829940508	0.945873743	0.596321182	1.026202413	0.292981435	0.453636045	0.28380167	0.100515525	0.574484813	0.123905432	1.53926283	0.055099597	0.252620862	0.179841436	0.940168617	0.561077631	0.216122364	1.008853222	0.273608224	0.320989056	0.201193248	0.223877586	0.11935706	0.393912912	0.574953204	0.281305368	0.254850163	0.324850798	0.457555997
E09000019	2013	0.431726792	0.609320096	0.608151977	0.294532509	0.198722297	0.158577977	0.666043055	1.271148638	0.238897535	0.327714008	0.181187943	0.261745076	0.417241258	0.815994032	0.719372975	0.215845927	0.730846625	0.015558622	0.131332508	0.792230574	0.935455367	0.608153467	1.042269372	0.276157909	0.464709184	0.309940009	0.113157337	0.728240757	0.114889111	1.778368698	0.072242662	0.249943285	0.166023686	0.957948664	0.575438344	0.201342081	1.257605348	0.318070081	0.323237729	0.163117695	0.224666031	0.114938982	0.36883961	0.614806553	0.329648751	0.229464312	0.308901101	0.502003667
E09000020	2013	0.481103798	0.643824374	0.665881055	0.301533611	0.221329158	0.180442117	0.750884296	1.309355132	0.253425748	0.349245406	0.202427333	0.290518571	0.470330922	0.796099613	0.811458592	0.24205128	0.807386258	0.016417948	0.145531061	0.863252547	0.963282705	0.664134657	1.131046725	0.30852895	0.508400015	0.329188377	0.138697159	0.787356173	0.113217193	1.95698543	0.070902722	0.272850322	0.18887697	1.010455281	0.587168872	0.215796717	1.455401813	0.342620529	0.3441193	0.189739175	0.243366036	0.131369473	0.440192853	0.669859412	0.339839392	0.247009607	0.34341604	0.540396183
E09000021	2013	0.482072708	0.621585653	0.641202556	0.318581633	0.221448387	0.180409386	0.69779608	1.241750048	0.278124216	0.369523952	0.196223711	0.29658661	0.43983323	0.824285839	0.762340972	0.246500874	0.832747578	0.018494262	0.129781925	0.90641419	1.00540314	0.690678282	1.146682039	0.319605778	0.497894459	0.350874335	0.128908987	0.736635241	0.102713443	1.960675133	0.071010322	0.274007003	0.188563184	1.027320111	0.64274723	0.21094612	1.476790046	0.37791119	0.323436463	0.155524602	0.249842055	0.118510785	0.386235335	0.643953715	0.35134393	0.246961684	0.342555266	0.537065999
E09000022	2013	0.431661317	0.621692836	0.608661936	0.304545798	0.189151161	0.148774108	0.679004284	1.318029345	0.237903888	0.329357916	0.183185434	0.250666828	0.41548137	0.847203456	0.684530816	0.211755015	0.731950799	0.015572673	0.138858685	0.783364649	0.952191495	0.599980308	1.040484367	0.263871612	0.463116651	0.316863444	0.112710919	0.730339706	0.104823717	1.758585837	0.079060297	0.246688239	0.16387129	0.962453551	0.581234507	0.195399148	1.277972586	0.314282665	0.315870607	0.180113965	0.220178122	0.10890892	0.357183633	0.610806544	0.333815299	0.222492965	0.307731395	0.509631428
E09000023	2013	0.426631974	0.592626898	0.601569032	0.299105393	0.184322225	0.154643068	0.664371665	1.255712337	0.246148303	0.336787741	0.188268579	0.248221843	0.391227521	0.84643565	0.671619599	0.217879553	0.716019401	0.014406537	0.132836195	0.810331149	0.966284117	0.607107043	1.047550453	0.27954978	0.469763876	0.314592382	0.110132975	0.695660098	0.104878029	1.737464098	0.071881947	0.250615677	0.170353644	0.955436089	0.587410827	0.20374256	1.212496269	0.317537661	0.314648239	0.188393034	0.233695873	0.114269961	0.365265244	0.583794051	0.313495032	0.227736603	0.304174124	0.509727332
E09000024	2013	0.467764015	0.608672695	0.632345143	0.312399504	0.210803844	0.170861994	0.700133341	1.232902505	0.260974565	0.350509121	0.196644494	0.272496853	0.424152395	0.832626742	0.720480642	0.233535661	0.771631261	0.01582556	0.139094184	0.86624536	0.990088768	0.652633527	1.100299211	0.300418581	0.489601834	0.333145897	0.123840747	0.722269674	0.106635514	1.831151203	0.071819544	0.266207263	0.182117784	1.007790486	0.609956675	0.212373506	1.335790898	0.338301839	0.3256874	0.189762115	0.246429297	0.118551483	0.392741122	0.618500343	0.328755692	0.241778432	0.329732488	0.518941315
E09000025	2013	0.322738353	0.434552862	0.513387698	0.216831431	0.173692955	0.139484955	0.614193501	0.984287615	0.187338428	0.247488253	0.147748972	0.156318892	0.350040472	0.720280912	0.530529454	0.172448608	0.484276678	0.008192395	0.128767914	0.686637558	0.854623076	0.442510019	0.869998776	0.240288419	0.366968748	0.208969234	0.080296741	0.421768113	0.143157828	1.066569379	0.044492351	0.221429126	0.151928171	0.825063042	0.45367263	0.206114424	0.592763579	0.168046579	0.304141439	0.242214574	0.188472848	0.110591792	0.405932578	0.425488019	0.203167243	0.241655397	0.288231638	0.390655868
E09000026	2013	0.409444702	0.524283231	0.591163506	0.264172705	0.208331881	0.161984029	0.670851963	1.059554893	0.228729876	0.306456773	0.177429885	0.217132764	0.39962146	0.77319819	0.620054602	0.209020439	0.62552864	0.012197455	0.135569245	0.823909414	0.953552577	0.579917311	1.010217918	0.284443326	0.451073813	0.267866866	0.098039485	0.544929747	0.131293442	1.433777406	0.052083609	0.251923804	0.175864807	0.915520278	0.540031114	0.217899733	0.943983379	0.254630188	0.319745781	0.208256091	0.221010391	0.12130048	0.412496752	0.548852848	0.261376962	0.257715982	0.337688376	0.461323945
E09000027	2013	0.531023107	0.678933772	0.698915002	0.348931509	0.231183941	0.193367249	0.731459779	1.287183586	0.304556519	0.402606732	0.212543322	0.332294544	0.472837292	0.852404083	0.836483421	0.266572226	0.942390933	0.022167161	0.14052286	0.959031776	1.043920022	0.73624449	1.216224032	0.339771151	0.542766237	0.39212125	0.141921779	0.855051274	0.091114681	2.213525284	0.080031696	0.289819387	0.195724977	1.115786455	0.678851062	0.212306515	1.760189407	0.419190223	0.331928043	0.154604688	0.263741405	0.122819523	0.39458849	0.671650425	0.391949838	0.24425093	0.357134642	0.583080359
E09000028	2013	0.397012293	0.571317952	0.575040383	0.291877808	0.173884632	0.149104321	0.647104293	1.258607608	0.230323448	0.319011038	0.185102947	0.235795385	0.379729921	0.820375906	0.64131427	0.201638924	0.673945411	0.012860514	0.129587176	0.761885826	0.931535324	0.575384648	1.00585165	0.26407986	0.451156941	0.294899571	0.103210764	0.700001537	0.112607617	1.656214495	0.074230514	0.23874092	0.159535886	0.923888268	0.553347443	0.199508367	1.112772132	0.293568061	0.314797272	0.188442174	0.22507232	0.114206556	0.362983342	0.565329854	0.298570921	0.220334576	0.292503614	0.494873497
E09000029	2013	0.480298904	0.624608965	0.65239239	0.33123284	0.210411304	0.183341389	0.692720002	1.33465681	0.285832485	0.374782034	0.209749046	0.301130098	0.42492469	0.853541989	0.760059978	0.252814392	0.841247107	0.017245489	0.135849503	0.927264715	1.031753634	0.708651234	1.166687675	0.333027664	0.523933689	0.363477161	0.125352307	0.771804776	0.096092274	2.024487398	0.07087731	0.274059636	0.196690659	1.038276135	0.661907479	0.214539977	1.494353548	0.3927827	0.323091044	0.149942056	0.264982194	0.123153181	0.388069771	0.653909837	0.346758779	0.245590919	0.336238601	0.534971493
E09000030	2013	0.355770722	0.482642788	0.527533363	0.220227257	0.184108976	0.139294242	0.613083016	1.059972525	0.197466978	0.268559105	0.146273213	0.187353116	0.368798365	0.700337878	0.631453757	0.181073512	0.561457618	0.009730852	0.122707866	0.692914082	0.812742708	0.493426466	0.893730649	0.240025642	0.375563035	0.230173024	0.098408547	0.483960093	0.12394269	1.30596788	0.054323015	0.22356469	0.147024616	0.825941074	0.471525224	0.198408901	0.789773761	0.210469618	0.296536884	0.204268294	0.182860871	0.105507034	0.393566117	0.514139762	0.259726717	0.231454262	0.278404742	0.403824565
E09000031	2013	0.396210715	0.537419663	0.573948207	0.270507756	0.183791979	0.152752627	0.647561853	1.223998092	0.231216115	0.307442823	0.180657776	0.223429025	0.369043335	0.798536657	0.621749962	0.209923727	0.639088686	0.011791774	0.135214486	0.78775454	0.926257372	0.568936551	0.992094226	0.277793308	0.443025367	0.284186084	0.101127307	0.601102266	0.11467867	1.527754716	0.060617845	0.243254582	0.168483651	0.905481797	0.547388721	0.207830219	0.996268104	0.273967301	0.313150785	0.203253962	0.235091123	0.115181573	0.388484492	0.544782593	0.272123245	0.233508049	0.296793792	0.476210541
E09000032	2013	0.476049778	0.655516816	0.654695713	0.323537273	0.221119304	0.163291027	0.699491217	1.290130278	0.258276853	0.361304799	0.184658938	0.275402127	0.450836183	0.853348483	0.774484693	0.231945451	0.821465358	0.01964779	0.139740418	0.845359652	0.982185594	0.645049679	1.10277901	0.289416664	0.481944093	0.340476496	0.121979137	0.765048752	0.106639157	1.919379672	0.082560536	0.267434317	0.171423776	1.012844636	0.616778201	0.202614158	1.440646629	0.345596513	0.327848962	0.17510712	0.224602222	0.115087116	0.37460953	0.625261821	0.376133768	0.231557397	0.327733023	0.535799218
E09000033	2013	0.449585438	0.605573646	0.627936627	0.274398456	0.223587722	0.170527703	0.707733908	1.226279805	0.233807029	0.329372165	0.183763004	0.265196452	0.443316307	0.765139499	0.796084394	0.231903007	0.744145647	0.015112057	0.13570195	0.818992772	0.918328838	0.627487513	1.075533238	0.286886804	0.478857119	0.298409792	0.129286874	0.691694126	0.120093546	1.803852558	0.065692642	0.264137982	0.184743025	0.945214511	0.552007332	0.215502098	1.258641515	0.310001565	0.334619869	0.186024711	0.226176422	0.128109715	0.426568594	0.637461863	0.319474513	0.252255628	0.331878872	0.499746135
S12000005	2013	0.494189709	0.618222791	0.662371597	0.346906644	0.19363247	0.204592994	0.668314776	1.576403172	0.317239601	0.402834371	0.244151513	0.353379254	0.403034459	0.870398998	0.811830826	0.267375899	0.918836343	0.018366132	0.12210509	0.989181084	1.037367211	0.801153943	1.250443554	0.393618417	0.567532915	0.409155223	0.121780612	0.899766714	0.077572759	2.391047449	0.069678602	0.268502757	0.226021468	1.050159166	0.725990835	0.21399479	1.670889868	0.490604337	0.320596369	0.095770248	0.316482779	0.134851601	0.368730213	0.71000321	0.363556112	0.233449918	0.325894416	0.53051305
S12000006	2013	0.469852469	0.601140595	0.629785326	0.346505612	0.179442255	0.186075827	0.617290228	1.702741811	0.316348335	0.3942776	0.228770469	0.332272248	0.383790264	0.869303628	0.783641483	0.264109246	0.897903498	0.016885816	0.119767855	0.959559832	0.997413904	0.749279573	1.212007576	0.370273827	0.534432297	0.393742499	0.112175246	0.842908742	0.071701537	2.32605638	0.072759338	0.253410473	0.204333527	1.041517902	0.699704345	0.201719841	1.528428452	0.455398857	0.312146773	0.093130048	0.29501699	0.135529498	0.337832373	0.690834096	0.365812383	0.210708845	0.311019113	0.513837724
S12000008	2013	0.496143157	0.623344352	0.662033761	0.351023589	0.192469317	0.20278721	0.66700261	1.55584645	0.326885281	0.407054287	0.246858783	0.352467995	0.400079955	0.892930007	0.825110231	0.273827716	0.935949468	0.018485593	0.126335769	1.008504561	1.062741594	0.805496129	1.270497027	0.392804451	0.564672664	0.42054207	0.123198384	0.898223583	0.077236762	2.403084832	0.072017208	0.270321235	0.220915831	1.080076212	0.748037847	0.212939433	1.675659324	0.492005171	0.320874666	0.095967789	0.317538525	0.136245493	0.359474619	0.711344786	0.377932553	0.232553077	0.324101799	0.549404092
S12000010	2013	0.509914893	0.637031233	0.668681296	0.35977637	0.197004663	0.200481171	0.675073075	1.478916979	0.332393527	0.417056022	0.239869191	0.348008531	0.409519372	0.894796994	0.835546624	0.277920083	0.957503466	0.018467087	0.131329623	1.021705935	1.073473648	0.799811992	1.273513657	0.383109607	0.568339622	0.428150864	0.127104059	0.909013275	0.074493836	2.408260021	0.074601715	0.279585318	0.216700875	1.117386682	0.749697764	0.21471615	1.729650838	0.485375336	0.322222986	0.10786207	0.310156624	0.132540079	0.362148659	0.686490695	0.383788736	0.234704801	0.326964094	0.563006731
S12000011	2013	0.463123353	0.615943403	0.624971371	0.327259522	0.194975855	0.177047665	0.632361402	1.462982895	0.294022895	0.375411619	0.207239449	0.315730108	0.403564658	0.828306286	0.764139268	0.249760117	0.866829504	0.017795783	0.116722128	0.899138406	0.973394238	0.70231058	1.145019274	0.332392544	0.502852438	0.372219193	0.115123268	0.816201981	0.078835483	2.148518526	0.075349656	0.253217903	0.190242744	0.993975312	0.660560806	0.194519353	1.546237657	0.422257525	0.307950407	0.097517113	0.265629727	0.121103629	0.333447278	0.651418868	0.358935982	0.212256482	0.311402015	0.516869653
S12000013	2013	0.503892933	0.630234976	0.675681882	0.355593848	0.198084322	0.207668917	0.673913054	1.648334156	0.326097741	0.412464958	0.247294881	0.363351083	0.411286389	0.860564695	0.817633651	0.272667322	0.945203773	0.018487799	0.132467258	1.01171483	1.048141138	0.817372536	1.273084229	0.39995604	0.57680387	0.420583002	0.124673373	0.937171839	0.075366889	2.47422925	0.073806678	0.275653375	0.226197302	1.083402586	0.724287374	0.217520956	1.723439712	0.500547098	0.327251592	0.092453764	0.320611314	0.138803242	0.391512679	0.717439144	0.365730031	0.23591813	0.331606647	0.543200351
S12000014	2013	0.486618516	0.631125055	0.654589782	0.350676911	0.189991159	0.192862764	0.654658278	1.627253011	0.321095155	0.404452237	0.235192735	0.343373896	0.403653446	0.903735909	0.819532911	0.268969832	0.932100221	0.01771668	0.122397484	0.987748756	1.054773334	0.782437277	1.25304003	0.376304291	0.549182889	0.415534281	0.121537374	0.883096367	0.074485914	2.384562452	0.075481428	0.27015788	0.209979235	1.073531329	0.744522338	0.208612469	1.641887807	0.484214255	0.315660125	0.106535594	0.301902823	0.13187487	0.339374105	0.686407259	0.388244134	0.224915108	0.318768176	0.548388352
S12000015	2013	0.485930699	0.622131575	0.653705708	0.349891855	0.18876155	0.196365201	0.653863713	1.634290918	0.319391703	0.403165624	0.237639151	0.34868735	0.400974534	0.886636124	0.815870064	0.268688216	0.92614165	0.017886752	0.11987053	0.983501797	1.042058564	0.787417846	1.250031252	0.382545455	0.550345527	0.412887472	0.120978062	0.881896889	0.074623888	2.37731578	0.072363773	0.26598302	0.212921227	1.064993902	0.733080261	0.209524691	1.638972998	0.485562451	0.318455987	0.10140275	0.305853587	0.133452141	0.345254909	0.694029995	0.377843511	0.225295766	0.317634607	0.539370884
S12000017	2013	0.506338595	0.636227476	0.671664413	0.357611987	0.193322588	0.203738735	0.67054123	1.61893509	0.324477213	0.41163105	0.244279889	0.356233337	0.409687875	0.885564443	0.826228061	0.272508826	0.948824098	0.018326148	0.131599994	1.011501721	1.054170851	0.802890582	1.271396424	0.391238643	0.573850377	0.418050843	0.127748375	0.922561625	0.074933	2.435434311	0.074138762	0.272921939	0.221605256	1.092167728	0.736669432	0.214086495	1.72181857	0.490126941	0.323413022	0.098981659	0.315166681	0.137188495	0.372980724	0.712616704	0.377105107	0.232522173	0.333442916	0.547439799
S12000018	2013	0.487338063	0.627658957	0.660444408	0.353912279	0.190211194	0.198122619	0.658110861	1.737837525	0.327948471	0.411982683	0.244599622	0.355932404	0.402278327	0.912392091	0.822578146	0.272303741	0.935216294	0.017627828	0.12209037	1.01662094	1.067284818	0.807677251	1.283381946	0.394897615	0.562428554	0.418030815	0.118743292	0.909534378	0.075722403	2.467766207	0.073543607	0.268823356	0.218380734	1.068026484	0.758610275	0.213505187	1.627775297	0.498931227	0.321663587	0.096320287	0.317212167	0.138143735	0.346204588	0.700872672	0.387347277	0.226374614	0.320898933	0.542683873
S12000019	2013	0.491303024	0.626982137	0.654988952	0.351764303	0.187193767	0.195536378	0.656855895	1.588783751	0.32268226	0.405036712	0.236638743	0.345484733	0.4026707	0.891769863	0.817553654	0.26703419	0.933695237	0.017907859	0.127800359	0.991113165	1.050543026	0.786091867	1.248138232	0.37970299	0.554211308	0.414873617	0.124085556	0.895304335	0.074147089	2.370846597	0.075063095	0.26805608	0.212132477	1.07878111	0.735540415	0.208076825	1.650721795	0.478673603	0.316274872	0.105880313	0.304658193	0.13318533	0.352562182	0.676952643	0.378893672	0.224935747	0.319897259	0.542450978
S12000020	2013	0.496084527	0.629359437	0.659780846	0.35947042	0.19041237	0.201135689	0.666270183	1.633868518	0.321831552	0.406619249	0.239044786	0.355134218	0.408358012	0.892485559	0.824065176	0.269217263	0.938074749	0.018894443	0.125558785	1.005930547	1.051408225	0.802403281	1.266016271	0.38671562	0.564945405	0.416583791	0.123602774	0.909984507	0.073556858	2.424847058	0.073373272	0.270827462	0.21691821	1.09358512	0.739900446	0.212029128	1.676907822	0.494839048	0.321098003	0.103602376	0.310763677	0.133666456	0.358733251	0.696506297	0.380037195	0.228166691	0.324335068	0.54578556
S12000021	2013	0.489368558	0.620502125	0.659402303	0.35114178	0.189244313	0.200663416	0.65593069	1.688292993	0.328205511	0.413708957	0.248785652	0.355410442	0.395548279	0.897502379	0.820061679	0.274034483	0.937889724	0.01761212	0.12439517	1.007402745	1.060012218	0.808189096	1.280345097	0.401435436	0.560557786	0.420934907	0.118886667	0.899602852	0.075652273	2.457043452	0.070751179	0.266985081	0.218870984	1.072201112	0.746012082	0.213363278	1.625417269	0.493885906	0.324208635	0.095983891	0.320103827	0.141191566	0.356374175	0.718755371	0.382102356	0.22787394	0.322928118	0.537828188
S12000023	2013	0.508191914	0.635934305	0.672758373	0.353646141	0.194739461	0.204324581	0.675523927	1.590719182	0.31718634	0.404248385	0.240946597	0.356210674	0.415739196	0.86690692	0.817953153	0.266825896	0.936695953	0.019154338	0.137738968	1.011749455	1.052150186	0.799981528	1.261093025	0.386380944	0.581102895	0.413420533	0.125859157	0.937214445	0.075740299	2.419802084	0.072240474	0.273924736	0.224259908	1.082282728	0.71815961	0.215646764	1.740549658	0.488968632	0.323431252	0.0969203	0.305762956	0.137277387	0.38567899	0.732893596	0.365362803	0.237048884	0.346995837	0.539555443
S12000024	2013	0.510437159	0.639268607	0.679060028	0.361630449	0.199300192	0.208175528	0.683412758	1.612133719	0.326085656	0.413985868	0.246709049	0.361273163	0.417227909	0.888843266	0.835496865	0.274724196	0.95722959	0.018985522	0.128238737	1.019740166	1.066114198	0.816877388	1.282230684	0.395567806	0.580865227	0.423516592	0.126948575	0.933188327	0.076333585	2.462334691	0.075057777	0.277221314	0.224806136	1.106105908	0.741370795	0.218335466	1.740662346	0.503423979	0.329372452	0.098625097	0.319037816	0.13753714	0.37878845	0.716692334	0.379188382	0.23822849	0.333276836	0.552340902
S12000026	2013	0.521628859	0.643647923	0.687203655	0.361957343	0.200093319	0.211870412	0.685713842	1.595827779	0.331549551	0.420213094	0.251052722	0.369233238	0.41760363	0.877968058	0.840154074	0.278666403	0.970784938	0.018835381	0.132116533	1.031558722	1.066267053	0.827655832	1.292859635	0.403330071	0.592657945	0.42874432	0.130911981	0.948069998	0.07465665	2.492573939	0.073453957	0.278326311	0.230806843	1.116126047	0.742049507	0.219980699	1.79519085	0.508584314	0.33092733	0.093441765	0.323276802	0.140175097	0.383919227	0.738887722	0.375972888	0.240558541	0.340913468	0.554823803
S12000027	2013	0.487564126	0.628133059	0.648435683	0.343056653	0.192374255	0.191745842	0.657605797	1.492227124	0.310320953	0.393967638	0.224620658	0.340673061	0.40504154	0.873879151	0.798296641	0.264580414	0.920026149	0.018514601	0.123426383	0.955569175	1.018832946	0.758108311	1.213947872	0.355228052	0.546042117	0.410878552	0.124459801	0.876899895	0.073082166	2.313766647	0.072786403	0.269396644	0.205528821	1.060556949	0.711370065	0.204320457	1.729460914	0.468104663	0.30988978	0.104894505	0.289766397	0.125082385	0.348924018	0.674861615	0.368901744	0.228297568	0.318767892	0.547057917
S12000028	2013	0.518972184	0.645391854	0.688215551	0.364100861	0.203993062	0.211188178	0.693489875	1.591924435	0.32781109	0.421170839	0.252190354	0.366967917	0.419393898	0.892579718	0.838690223	0.280666379	0.967737698	0.019156081	0.129670497	1.029418041	1.077780688	0.828190218	1.295299037	0.404659186	0.589969219	0.426825923	0.129699608	0.938448421	0.077922576	2.494245761	0.073046846	0.280517777	0.229613797	1.10562197	0.742181992	0.221495726	1.768858579	0.506315332	0.335975382	0.099016368	0.323893935	0.139996307	0.384501042	0.740970327	0.379519701	0.2427433	0.340530929	0.553318744
S12000029	2013	0.494656322	0.63820702	0.665715846	0.353565834	0.19523009	0.196797578	0.668293962	1.619277582	0.323015324	0.409933243	0.238576875	0.35134131	0.409867967	0.906906653	0.827234473	0.273292732	0.943128462	0.01797352	0.125084812	1.000695159	1.063878739	0.792671504	1.26786056	0.382982656	0.557738249	0.421568354	0.124061457	0.901690435	0.076468073	2.411714363	0.07478372	0.27464127	0.2130242	1.088625994	0.747927984	0.211942628	1.678897637	0.488180917	0.322331895	0.10494715	0.308458521	0.133358995	0.350679099	0.694907824	0.387994484	0.22968724	0.323180535	0.553826621
S12000030	2013	0.496598118	0.632449533	0.665652645	0.348288569	0.195621499	0.197179591	0.670661569	1.568628857	0.322345965	0.405357275	0.238968083	0.34790806	0.408083668	0.898374555	0.823067782	0.272921438	0.931932321	0.017856185	0.127863511	0.993673347	1.058304827	0.785816706	1.253543193	0.381720095	0.560072841	0.413969877	0.127149118	0.889054974	0.080746451	2.367468457	0.074259712	0.273994207	0.216002413	1.080361578	0.735894195	0.212684137	1.660836946	0.47861077	0.323371903	0.103058279	0.308373525	0.133068776	0.365489106	0.700332009	0.379732153	0.233324609	0.326210641	0.55112249
S12000033	2013	0.46451232	0.630527995	0.637738628	0.336652907	0.193659828	0.179885016	0.646455776	1.588598333	0.298264071	0.381278235	0.214298566	0.323232588	0.411733297	0.894028561	0.793782466	0.25429759	0.878065627	0.01752421	0.12115031	0.930888626	1.012941338	0.727576807	1.186076642	0.343419738	0.521185017	0.383043983	0.11809739	0.833632442	0.083882	2.217294122	0.076668846	0.262912096	0.198577705	1.027787036	0.696730371	0.202941134	1.547545205	0.436229657	0.31582274	0.114451862	0.27853312	0.124830019	0.340474039	0.664184155	0.376709091	0.220338303	0.320342884	0.527976072
S12000034	2013	0.508339187	0.648926448	0.665974013	0.358439253	0.196721534	0.197667905	0.678926048	1.508368332	0.323338748	0.409186425	0.232443997	0.354755301	0.421043964	0.892768556	0.827909076	0.273060058	0.956185256	0.019519438	0.129317901	0.995086643	1.056894424	0.788453816	1.258131281	0.372235086	0.556187901	0.421429465	0.131272929	0.898809485	0.075247762	2.368501604	0.074799655	0.276564846	0.212172185	1.105337414	0.733676068	0.209878188	1.753482914	0.481086517	0.321405429	0.115219489	0.299395086	0.129389849	0.354955163	0.680732526	0.384947257	0.229819899	0.330177245	0.560871515
S12000035	2013	0.522929248	0.642000622	0.690612481	0.360190022	0.2012854	0.215395482	0.688602068	1.613137685	0.328203802	0.417669503	0.252952518	0.369524863	0.418134418	0.873076113	0.836609597	0.277494712	0.968639343	0.019162338	0.133444152	1.034905743	1.066506292	0.830828983	1.298926385	0.406958593	0.599385698	0.425921059	0.128916302	0.962545378	0.074792844	2.523837331	0.072311378	0.278861517	0.23451125	1.111805347	0.738292557	0.220801591	1.80783906	0.513200301	0.331438957	0.087987125	0.327601337	0.141579057	0.398246825	0.747498948	0.369953778	0.242596606	0.340885191	0.549713301
S12000036	2013	0.49785506	0.65530427	0.679368751	0.347444283	0.202539884	0.199666458	0.693402895	1.572987037	0.315285553	0.406307507	0.235094349	0.351577698	0.428237341	0.90287857	0.829117181	0.269564879	0.940570095	0.018511289	0.135076433	0.991066034	1.0675562	0.788901046	1.265051492	0.377625938	0.561588933	0.411968809	0.130590934	0.897005999	0.082870717	2.380294512	0.073416365	0.279640748	0.216725108	1.088893641	0.734644463	0.216037211	1.701682718	0.478063922	0.327554533	0.108952021	0.302710287	0.13335852	0.37237986	0.704336283	0.384038376	0.239090435	0.337831922	0.557105671
S12000038	2013	0.484987574	0.63045721	0.659667728	0.344102158	0.19531928	0.194192471	0.666784369	1.604442918	0.315963883	0.398980664	0.233761571	0.341431391	0.410120507	0.893272828	0.812607158	0.267310301	0.916815835	0.017606735	0.124692428	0.982075215	1.04880806	0.775446157	1.2443589	0.37518495	0.548569956	0.40632295	0.121607419	0.877736349	0.080952	2.347001918	0.073641531	0.271551315	0.210572963	1.065735138	0.728372918	0.211622071	1.631370338	0.47128212	0.322051309	0.103268592	0.302022965	0.132254384	0.359745289	0.690791343	0.378016096	0.230700384	0.324711686	0.544990987
S12000039	2013	0.473942689	0.615245749	0.647565677	0.347537074	0.184586017	0.191815547	0.643252097	1.716735754	0.320572911	0.401788315	0.237534347	0.344442887	0.393388578	0.901798391	0.813402178	0.269203155	0.914290077	0.017075078	0.117299139	0.982847085	1.046955061	0.784280207	1.24978308	0.382330096	0.543036971	0.407101273	0.115177814	0.870606512	0.076042754	2.389277547	0.071758144	0.264462833	0.210712984	1.04719586	0.739964032	0.208405866	1.572651724	0.479861397	0.316543135	0.096321179	0.30794857	0.134354708	0.333813417	0.683879422	0.380926178	0.220035921	0.313293676	0.537607273
S12000040	2013	0.476522255	0.62434187	0.639673461	0.347711782	0.183328407	0.186149437	0.642373708	1.603779677	0.319009569	0.396058622	0.227447989	0.33378247	0.399111417	0.898379906	0.807907232	0.263470914	0.915472287	0.017683393	0.124970573	0.972899838	1.040610274	0.759503561	1.230641921	0.36239549	0.530814412	0.408746542	0.119873037	0.862760403	0.072987133	2.315734015	0.075493608	0.264832419	0.200963321	1.066980211	0.736013724	0.202730695	1.604583097	0.465975338	0.30826244	0.110933268	0.290199322	0.12786575	0.330278754	0.655089283	0.383243525	0.217154985	0.314101968	0.545922007
S12000041	2013	0.501985353	0.626413811	0.667226409	0.356074141	0.192434165	0.204690844	0.667415123	1.621640895	0.326345593	0.410862821	0.244676686	0.356835749	0.405061072	0.879764528	0.827165778	0.27426727	0.946079263	0.018325911	0.126312696	1.007878965	1.049369449	0.808404001	1.273423443	0.394351834	0.571426235	0.419310868	0.125376279	0.909940267	0.074142141	2.426356601	0.072363778	0.270263095	0.222842042	1.093642538	0.734722824	0.213868847	1.699391816	0.495190491	0.324136619	0.097485272	0.316371769	0.136872662	0.366680913	0.706706061	0.374404752	0.23106801	0.32570383	0.543815296
S12000042	2013	0.475210514	0.614299118	0.653561103	0.346649472	0.189590898	0.196123802	0.66060046	1.716540412	0.32024267	0.404220406	0.24343873	0.344950642	0.397925868	0.91326188	0.810191601	0.268189853	0.905393762	0.016775597	0.121625375	0.995088171	1.062913388	0.791760931	1.26636277	0.391946681	0.55323276	0.407023561	0.116818701	0.868058507	0.084527162	2.358779055	0.071078482	0.266513574	0.216827138	1.066393545	0.742184157	0.214893167	1.529839335	0.475040194	0.327165802	0.111689322	0.315737456	0.138845982	0.363356389	0.685489706	0.374736134	0.229186801	0.317659444	0.539212752
S12000044	2013	0.475302818	0.617642639	0.642666365	0.345903524	0.186687064	0.18743041	0.641699423	1.649502829	0.319918876	0.400648472	0.230681123	0.33724549	0.394322769	0.902003274	0.80968214	0.267150445	0.916091688	0.017110642	0.121491212	0.974978799	1.042982745	0.768421771	1.239543875	0.37136597	0.532787533	0.410635973	0.118067162	0.863926965	0.073618639	2.347649357	0.073923959	0.265616812	0.202692343	1.057024401	0.740116138	0.205207053	1.582680118	0.472455806	0.31077512	0.106999661	0.297039115	0.129836329	0.32861172	0.665395534	0.384203014	0.218586113	0.308700016	0.544227727
S12000045	2013	0.519253641	0.653338459	0.682543058	0.358308042	0.204685493	0.205808537	0.698562835	1.482500701	0.322698522	0.416197912	0.241753611	0.3588032	0.426862721	0.880471967	0.828772315	0.277886913	0.957344809	0.019430381	0.126883828	1.009270848	1.074072004	0.798390683	1.276800981	0.385950356	0.576051396	0.421462512	0.132482116	0.908480029	0.080155288	2.398357467	0.073855597	0.282722526	0.218821806	1.115891265	0.732064286	0.217623053	1.773082112	0.485835387	0.334053301	0.109328013	0.310620104	0.133636424	0.383415649	0.716400626	0.377688872	0.243952232	0.34241539	0.563239343
S12000046	2013	0.431343507	0.595436083	0.613149551	0.318363903	0.179036297	0.173162785	0.616499089	1.674802375	0.297788071	0.370578258	0.213165104	0.308079749	0.384583035	0.87794221	0.762544966	0.245345705	0.834100854	0.015163276	0.117166996	0.910035348	0.992933755	0.709061744	1.162701486	0.344795694	0.496543383	0.366265181	0.105590378	0.795328694	0.084850021	2.180260731	0.074546056	0.24881926	0.19167992	0.973108229	0.692412304	0.199308713	1.377691684	0.420291915	0.305161825	0.100349311	0.279958109	0.127553317	0.331616064	0.648162868	0.362357901	0.210484817	0.30023635	0.505842183
W06000001	2013	0.508579869	0.616936994	0.6702052	0.358116237	0.195818543	0.207953786	0.66775907	1.63775143	0.323642982	0.410825065	0.247218542	0.358663362	0.399282208	0.87335999	0.815335143	0.276901844	0.939129482	0.017804751	0.126159118	1.003521647	1.039769251	0.812664817	1.268634863	0.401023333	0.577685931	0.414091702	0.125792565	0.907121379	0.074955711	2.430891051	0.068566156	0.271093924	0.226945009	1.082026423	0.726656524	0.217152606	1.714370752	0.494203093	0.326011286	0.104035886	0.321740171	0.139113805	0.379811791	0.742201435	0.367383366	0.234406804	0.327451835	0.53384227
W06000002	2013	0.488285744	0.604602305	0.644485073	0.351509171	0.186730493	0.198204276	0.643053233	1.640646386	0.31708526	0.397807018	0.238454566	0.339841472	0.390925106	0.860335978	0.790981076	0.263327995	0.904348184	0.017875208	0.130439656	0.983361092	1.016540694	0.780497681	1.232699077	0.382385562	0.559924647	0.397522842	0.11938193	0.883658858	0.073780615	2.367574994	0.068801259	0.261332444	0.219218641	1.046655148	0.704113771	0.209737694	1.64392165	0.467972109	0.315859136	0.098879753	0.30646234	0.136411897	0.37366835	0.724424141	0.356833298	0.224525521	0.324740457	0.52216906
W06000003	2013	0.516574256	0.624541739	0.671556083	0.360353803	0.197284047	0.213823468	0.677374843	1.567709532	0.323378647	0.412682302	0.250290195	0.363457889	0.406885952	0.851411381	0.819064085	0.273983862	0.941151642	0.019715742	0.125120364	1.014910433	1.044243301	0.821603074	1.27568204	0.403468573	0.588570524	0.414829336	0.124977436	0.922184135	0.074657098	2.450907091	0.069898813	0.271388095	0.232275348	1.081941585	0.718649657	0.218073817	1.760790331	0.500783538	0.328680483	0.091025245	0.324352343	0.14021926	0.386264033	0.751084438	0.359993035	0.237689585	0.337576169	0.536056857
W06000004	2013	0.499396188	0.615410318	0.66073732	0.357707423	0.191240619	0.203447698	0.661422855	1.617407796	0.322799609	0.410488431	0.244148448	0.351630964	0.398393561	0.873951122	0.805968217	0.271358792	0.930690125	0.017939768	0.130586709	1.005686871	1.037690271	0.800890104	1.25868711	0.395067357	0.57141048	0.409326597	0.123152943	0.899375746	0.07392409	2.408367882	0.068836753	0.265374225	0.22128513	1.076571065	0.723810424	0.214958323	1.713899474	0.481596227	0.322983549	0.101301846	0.31450055	0.136646877	0.374625497	0.724379536	0.364992838	0.231083382	0.322826888	0.534573552
W06000005	2013	0.487810418	0.620895488	0.64741353	0.351418455	0.187700805	0.197485161	0.650734193	1.590757448	0.321791178	0.401114705	0.237661582	0.34570924	0.396457536	0.878918136	0.812116782	0.267760399	0.919150325	0.018357839	0.12214734	0.98714411	1.038650109	0.78364169	1.247982169	0.379009197	0.545933641	0.41153619	0.120822433	0.877567335	0.073288022	2.348481734	0.073008422	0.264987243	0.213233742	1.06988107	0.728164334	0.207925216	1.666461772	0.479561008	0.316186385	0.10464837	0.304381465	0.133703367	0.344944091	0.696305673	0.372343479	0.224422711	0.320546358	0.539021469
W06000006	2013	0.479276208	0.611088488	0.638287195	0.34741627	0.185335032	0.190474867	0.645311302	1.580418737	0.310935696	0.391632541	0.227832405	0.331580621	0.396524766	0.870770857	0.791176916	0.261679417	0.901686665	0.017588966	0.120588809	0.960066807	1.023275271	0.759858255	1.212170673	0.365832289	0.538160993	0.398286865	0.121008638	0.852052067	0.073834772	2.282304375	0.072615161	0.262805806	0.205420713	1.0493451	0.711975071	0.20539457	1.632494825	0.463252009	0.311063979	0.111883247	0.290355958	0.127926481	0.342329097	0.677701261	0.370698571	0.222029238	0.311437711	0.531952427
W06000008	2013	0.491716702	0.608258903	0.65516619	0.347108691	0.190128795	0.203897214	0.65615026	1.617151567	0.314720119	0.398947287	0.23990585	0.347091618	0.396237441	0.835295604	0.793577333	0.262896028	0.911616472	0.017743951	0.129265398	0.97479936	1.01658859	0.787264649	1.234937239	0.387403102	0.564841272	0.396662359	0.123733217	0.889765589	0.077096882	2.355308678	0.066729971	0.261913282	0.221697006	1.053511849	0.69364633	0.210803169	1.678517115	0.470762045	0.321943139	0.090655656	0.31200949	0.137708159	0.38714485	0.740644636	0.349695966	0.229423303	0.326839473	0.525793299
W06000009	2013	0.508555689	0.622157712	0.664954776	0.359042284	0.193646014	0.207784701	0.669575235	1.608726147	0.325315025	0.412438672	0.246538538	0.356869144	0.402571524	0.868166826	0.813962886	0.273522724	0.942832439	0.0185546	0.132816131	1.015979162	1.042955102	0.813002135	1.270517165	0.400005383	0.580509188	0.41600184	0.127034573	0.92224067	0.073581216	2.437960631	0.069290303	0.269612184	0.226815586	1.090874307	0.722897621	0.215942103	1.746576198	0.490774003	0.325102358	0.098018739	0.319910722	0.139222456	0.385531628	0.737752474	0.364396823	0.234491568	0.331473722	0.536479354
W06000010	2013	0.496932791	0.618393763	0.659574355	0.354079587	0.193013911	0.203553131	0.663070188	1.624538866	0.318716004	0.407759558	0.244077498	0.35130122	0.399075705	0.870341864	0.81021482	0.270427515	0.928771021	0.018303148	0.125468968	0.995087067	1.042915258	0.799548103	1.259851772	0.392943898	0.569402714	0.411168479	0.124802512	0.892874542	0.075245329	2.399361298	0.068970916	0.267936481	0.221670535	1.071623816	0.720760517	0.214599986	1.698633741	0.485449414	0.324044539	0.102162118	0.313025802	0.136618804	0.371804241	0.727428862	0.365391062	0.231649828	0.325620876	0.535780801
W06000011	2013	0.463330863	0.596728876	0.628715108	0.334091104	0.184655366	0.190248169	0.636183975	1.626197627	0.307007977	0.386764895	0.228550555	0.328934424	0.388277964	0.858102297	0.77928549	0.255719017	0.875382283	0.017123923	0.118535919	0.950102761	1.011835145	0.753203101	1.206133996	0.368799895	0.530693815	0.38611066	0.114640199	0.840707098	0.078528532	2.264243726	0.070061054	0.256504334	0.206298439	1.016724939	0.699839652	0.20544343	1.54484477	0.453047846	0.312780546	0.100041391	0.294473535	0.131478451	0.352187858	0.685908175	0.358994237	0.221045542	0.311701199	0.517247202
W06000012	2013	0.483252118	0.615068023	0.652147115	0.350790603	0.189463863	0.198577913	0.653971715	1.720022221	0.321777107	0.406002275	0.241362402	0.350708626	0.397152288	0.894233629	0.816487295	0.269331058	0.925606684	0.017634242	0.121153783	0.992489639	1.051640621	0.798511792	1.263978746	0.389815027	0.556985484	0.415381331	0.120345797	0.88946748	0.074441854	2.406393902	0.072731784	0.265723968	0.215398668	1.071220197	0.737459456	0.211605529	1.646774767	0.488949415	0.321178228	0.10440751	0.31191771	0.136806581	0.352724402	0.70754516	0.377459854	0.226002556	0.3161037	0.535904166
W06000013	2013	0.488113444	0.621788209	0.653219654	0.355199377	0.187799682	0.196969068	0.65761985	1.693141224	0.323794407	0.406977898	0.239651802	0.348200674	0.400526701	0.901319101	0.818540936	0.270146322	0.930051308	0.018249601	0.1237357	1.000314849	1.053867328	0.793717159	1.262719523	0.386804602	0.556704669	0.415486393	0.121120431	0.891359482	0.07423676	2.402400072	0.073233456	0.267123189	0.21464149	1.073599294	0.74283346	0.21051779	1.658885902	0.486306295	0.319128134	0.103810362	0.308108947	0.134905037	0.349554891	0.703701523	0.381018623	0.224793005	0.318925454	0.540495402
W06000014	2013	0.502155572	0.632103429	0.663087484	0.356454926	0.195806118	0.200461069	0.674058334	1.579665758	0.3231696	0.409160405	0.237839949	0.350763135	0.413837642	0.890420856	0.822548082	0.271617648	0.937098515	0.018646581	0.128928195	1.001116552	1.053854981	0.792204486	1.262985074	0.382850622	0.560341614	0.414769962	0.126054043	0.895076626	0.076808546	2.381477812	0.073243291	0.27196377	0.21412196	1.091615347	0.732150551	0.213244604	1.719736768	0.480122989	0.324608263	0.110668539	0.304600798	0.134100122	0.367554936	0.706629007	0.377998574	0.230723261	0.32660955	0.549231028
W06000015	2013	0.428219094	0.578089832	0.598143262	0.312514123	0.18069465	0.169800752	0.614409672	1.483524129	0.281039653	0.354652296	0.200369956	0.288137018	0.383587328	0.839854413	0.735058753	0.236430593	0.794252353	0.015459702	0.117685554	0.869928875	0.963648305	0.670722265	1.112505242	0.321726756	0.481313525	0.34673043	0.109643368	0.744931908	0.087754324	1.987754776	0.069750374	0.243474726	0.182635602	0.963670943	0.650246246	0.196493713	1.357355048	0.38697982	0.301557959	0.122111561	0.257765337	0.119451491	0.339651543	0.626586062	0.340100482	0.212892522	0.299355786	0.498135613
W06000016	2013	0.471633635	0.604570777	0.633566398	0.345748568	0.181647571	0.189832007	0.63105219	1.686366432	0.318199331	0.398879908	0.233376542	0.338611024	0.384589626	0.887103607	0.796257695	0.264530905	0.904841353	0.016935237	0.12254145	0.968010649	1.027606774	0.770542461	1.231439986	0.37703539	0.537558315	0.403879332	0.117437197	0.856646475	0.072573211	2.342514988	0.071161543	0.2588343	0.207405178	1.043353252	0.723927056	0.204920052	1.58659949	0.467876687	0.310204956	0.105236197	0.29918585	0.133620465	0.337188499	0.693890619	0.372782832	0.217118209	0.309145694	0.525255199
W06000018	2013	0.477522622	0.612486936	0.64072323	0.351828809	0.182279533	0.191387578	0.642555696	1.671934194	0.322010989	0.402653028	0.23426897	0.340634501	0.391914348	0.898547528	0.808254593	0.268593502	0.913616529	0.017433978	0.120693267	0.977824853	1.039653432	0.776657079	1.244199492	0.378567574	0.540163755	0.409471809	0.119014742	0.857835415	0.073531052	2.341621799	0.072502044	0.26312075	0.209256901	1.05821676	0.734033396	0.20625271	1.609528542	0.472171745	0.314199542	0.111846594	0.301144482	0.133075126	0.336875072	0.678947313	0.378348652	0.218566918	0.310147907	0.53393836
W06000019	2013	0.458865579	0.593850399	0.628868587	0.346624732	0.175159733	0.188969552	0.626250641	1.843449422	0.32187656	0.399192533	0.239007929	0.341569079	0.375586423	0.913966475	0.799728829	0.267551281	0.900188439	0.016347503	0.117224073	0.980511191	1.033004725	0.786633427	1.247853085	0.388861416	0.539083592	0.410641033	0.110284131	0.858714114	0.073107804	2.403232151	0.070011614	0.256255612	0.209291772	1.041675751	0.746342809	0.206328363	1.531985373	0.48253676	0.310943287	0.102188714	0.311934998	0.1368469	0.329732518	0.699051759	0.38150239	0.21341296	0.301102893	0.522836111
W06000020	2013	0.475067291	0.601373004	0.638381521	0.347273023	0.183659241	0.192741193	0.641356673	1.683390837	0.319672482	0.399699466	0.236038012	0.34064072	0.386350554	0.885745991	0.799025249	0.268790666	0.903937754	0.017237983	0.118596934	0.972674835	1.031678667	0.778790093	1.240710374	0.383085033	0.539641325	0.406860342	0.118722431	0.856702405	0.074557091	2.336501222	0.070182267	0.261932834	0.210720876	1.052460057	0.727782205	0.20810374	1.587263687	0.472940369	0.314075697	0.107382111	0.306728207	0.133973923	0.342179175	0.687647302	0.370478156	0.221127128	0.304375512	0.529502216
W06000021	2013	0.526013117	0.650493411	0.683664925	0.361286881	0.202402216	0.212421111	0.698638196	1.470719098	0.326171696	0.415481808	0.247147708	0.366411269	0.422775779	0.876210383	0.835191623	0.279186292	0.972792957	0.020202043	0.132999994	1.020351264	1.069067071	0.816562828	1.284132224	0.394046054	0.591764806	0.425066248	0.136593756	0.941454638	0.077056776	2.439924613	0.072774372	0.280880171	0.228189293	1.126827763	0.734762466	0.215888126	1.870414325	0.497033954	0.329251835	0.09563702	0.319145285	0.135611649	0.389175872	0.750658651	0.375371991	0.242764939	0.346639609	0.557649038
W06000022	2013	0.450879028	0.583041449	0.612719292	0.332703323	0.178870988	0.182152766	0.625283489	1.581465445	0.305202469	0.378707552	0.220926807	0.314223068	0.380275936	0.865672471	0.763700893	0.253081451	0.845218033	0.016206737	0.117321225	0.931242077	1.006988836	0.729033057	1.181840055	0.355502905	0.513560451	0.377603262	0.110045443	0.800084083	0.080355379	2.166537454	0.07081355	0.253231776	0.198504617	1.007256189	0.693747831	0.202969246	1.452612646	0.42967631	0.307036438	0.119459683	0.2870206	0.1283305	0.340921338	0.641727235	0.351418596	0.215709495	0.301782347	0.513868306
W06000023	2013	0.523600818	0.638319785	0.685625814	0.365993357	0.199235747	0.214626862	0.685710061	1.590035482	0.331581756	0.418875768	0.2512441	0.365426661	0.414274163	0.873692281	0.831204461	0.279784925	0.967854881	0.019007238	0.139459218	1.033094886	1.051971472	0.828214607	1.287686816	0.404170187	0.597572537	0.424681467	0.13118468	0.948989994	0.074440769	2.490038606	0.072393142	0.276634885	0.233404966	1.131960782	0.730932876	0.219602798	1.822628713	0.502737539	0.329515045	0.094741286	0.325996729	0.140258403	0.401788455	0.747544122	0.366031014	0.240552249	0.342181246	0.551985284
W06000024	2013	0.45950062	0.591873357	0.623090122	0.341602548	0.175593761	0.186274479	0.625836941	1.745377537	0.31453439	0.393315594	0.230557657	0.333592892	0.379454353	0.883043233	0.788354707	0.260755252	0.884174737	0.016636132	0.117175176	0.958084149	1.021029218	0.764130257	1.22027285	0.374505588	0.527001397	0.397699124	0.112028056	0.844083386	0.074647852	2.309488615	0.071439721	0.25212962	0.204969936	1.02431725	0.722351509	0.202343585	1.519372736	0.462487956	0.306662726	0.104162546	0.299727399	0.132924688	0.332189877	0.667749844	0.366524034	0.213074753	0.302896549	0.51813571
[truncated: 58 more columns]
